# Supplementary material for: Ruthenium-catalysed synthesis of chiral exocyclic allylic alcohols via chemoselective transfer hydrogenation of 2-arylidene cycloalkanones
Source: Royal Society of Chemistry journal article supplement (doi:10.1039/d1gc00026h), 2021-01-01
Supplement: d1gc00026h1.pdf [file d1gc00026h1.pdf]

*Supporting Information for*

**Ruthenium-catalysed synthesis of chiral exocyclic allylic alcohols via chemoselective transfer hydrogenation of 2-arylidene cycloalkanones**

Kaili Zhang, Qixing Liu, Renke He, Danyi Chen, Zhangshuang Deng, Nianyu Huang, and Haifeng Zhou\*

Hubei Key Laboratory of Natural Products Research and Development, Key Laboratory of Functional Yeast, China National Light Industry, College of Biological and Pharmaceutical Sciences, China Three Gorges University, Yichang 443002, China

|                                                                                  |    |
|----------------------------------------------------------------------------------|----|
| 1. General Information.....                                                      | 2  |
| 2. Preparation of 2-Arylidene Cycloalkanones .....                               | 2  |
| 3. General Procedure for the Synthesis of Racemic 2-Arylidene Cycloalkanols..... | 2  |
| 4. Asymmetric Transfer Hydrogenation of 2-Arylidene Cycloalkanones.....          | 3  |
| 5. Gram-Scale Synthetic of Compound <b>3m</b> .....                              | 3  |
| 6. Gram-Scale Synthetic of Compound <b>7</b> .....                               | 4  |
| 7. Analytical Data of the Products .....                                         | 4  |
| 8. <sup>1</sup> H NMR & <sup>13</sup> C NMR Spectra of the Products .....        | 22 |
| 9. HPLC Spectra of the Products .....                                            | 74 |

## 1. General Information

Unless otherwise noted, all reagents, catalysts and solvents were purchased from commercial suppliers and used without further purification. Column Chromatography was performed with silica gel. NMR spectra were recorded on Bruker AVANCE III (400 MHz) spectrometers. CDCl<sub>3</sub> was used for the NMR analysis with tetramethyl silane as the internal standard. Chemical shifts were reported up field to TMS (0.00 ppm) for <sup>1</sup>H NMR and relative to CDCl<sub>3</sub> (77.0 ppm) for <sup>13</sup>C NMR. HPLC analyses were conducted on a Waters 2489 Series instrument with chiral column OJ-H and OD-H. Optical rotations were measured on a MCP-500. Melting points were determined using X-4 made by Peking Taiké Apparatus Co., Ltd. HRMS spectra were acquired using an Agilent 6540 ESI/TOF mass spectrometer.

## 2. Preparation of 2-Arylidene Cycloalkanones <sup>[1]</sup>

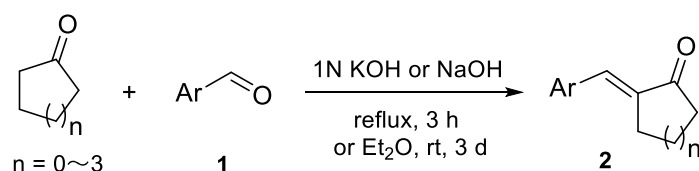

A mixture of aldehyde **1** (30 mmol), cycloalkanone (45 mmol), and 1N KOH solution (30 mL) was refluxed for 3 h (method A) or a mixture of aldehyde (30 mmol), cycloalkanone (36 mmol), diethyl ether (30 mL), and 1N NaOH solution (30 mL) was stirred at room temperature for 72 h (method B). After reaction, the mixture was diluted with 50 mL of diethyl ether and the aqueous layer was separated and extracted with ether (3 × 20 mL). The combined ethereal solution was washed to neutral with water and dried over Na<sub>2</sub>SO<sub>4</sub>. The solvent was evaporated, and the product was purified by silica gel column chromatography with PE/EA to yield the corresponding 2-arylidene cycloalkanone as a yellow solid.

Method A is for the synthesis of 2-arylidene cycloalkanone **2a-2w** and **4a-4i**.

Method B is for the synthesis of 2-arylidene cycloalkanone **4j-4a'**.

## 3. General Procedure for the Synthesis of Racemic 2-Arylidene Cycloalkanols

The cycloalkanone (0.2 mmol) was dissolved in 1.0 mL MeOH, and NaBH<sub>4</sub> (0.4 mmol) was added slowly. The mixture was stirred at room temperature until the starting material was disappeared. And then 5.0 mL of H<sub>2</sub>O was added slowly, the residue was extracted 3 times with

ethyl acetate. The combined organic layer was dried over Na<sub>2</sub>SO<sub>4</sub> and evaporated under reduced pressure. The product was further purified by silica gel column.

#### 4. Asymmetric Transfer Hydrogenation of 2-Arylidene Cycloalkanones

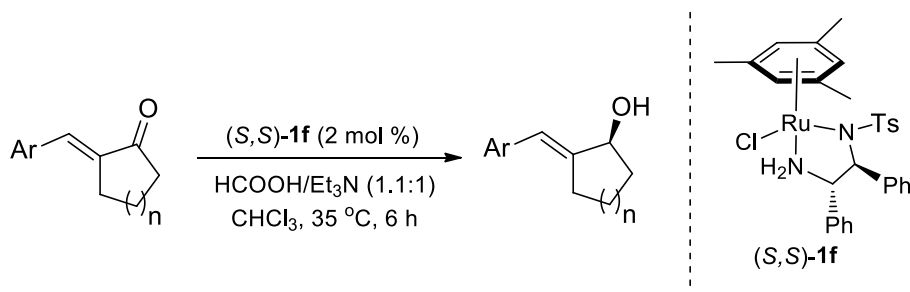

In a 10 mL Schlenk tube, formic acid (1.1 mmol, 42  $\mu$ L), triethylamine (1.0 mmol, 139  $\mu$ L), and 1.0 mL CHCl<sub>3</sub> were added. After stirring for 1 h, (S,S)-**1f** (0.004 mmol, 2.49 mg), 2-arylidene cycloalkanone (0.2 mmol) were added. And then the mixture was stirred at 35 °C for 6 h. The solvent was removed under reduced pressure. Saturated sodium bicarbonate (5 mL) was added and extracted 3 times with ethyl acetate. The combined organic layer was dried over Na<sub>2</sub>SO<sub>4</sub> and concentrated under reduced pressure. The residue was further purified by silica gel column to give the desired 2-arylidene cycloalkanol.

#### 5. Gram-Scale Synthesis of Compound **3m** <sup>[1]</sup>

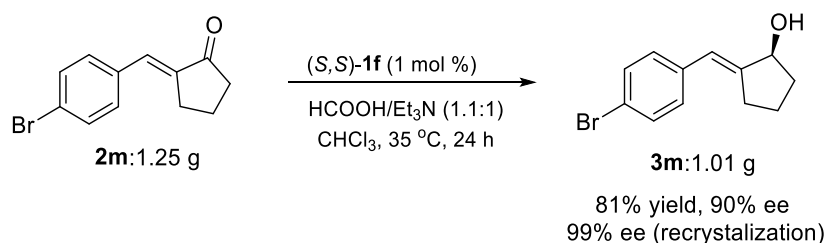

In a 30 mL Schlenk tube, formic acid (5.5 mmol, 208  $\mu$ L), triethylamine (5.0 mmol, 695  $\mu$ L), and 10 mL CHCl<sub>3</sub> were added. After stirring for 1 h, (S,S)-**1f** (0.025 mmol, 6.2 mg), compound **2m** (1.25g, 5 mmol) were added. And then the mixture was stirred at 35 °C for 24 h. The solvent was removed under reduced pressure. Saturated sodium bicarbonate (5 mL) was added and extracted 3 times with ethyl acetate. The combined organic layer was dried over Na<sub>2</sub>SO<sub>4</sub> and concentrated under reduced pressure. The residue was further purified by silica gel column to give compound **3m** (1.01 g, 81% yield, 90% ee). The ee value was improved to 99% by recrystallization from ethyl acetate/petroleum ether.

## 6. Gram-Scale Synthesis of Compound 7<sup>[2]</sup>

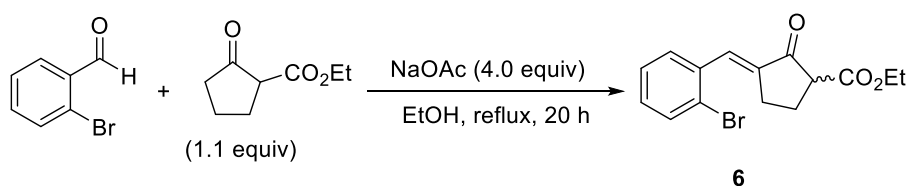

To a flame-dried three-neck flask, NaOAc (2.0 g, 24 mmol), anhydrous ethanol (10 mL), 2-bromobenzaldehyde (1.1 g, 6 mmol) and ethyl 2-oxocyclopentanecarboxylate (1.0 g, 6.6 mmol) were added. The reaction mixture was refluxed for 20 h. And then the reaction mixture was acidified with 2 M HCl at 0 °C. The mixture was extracted with EtOAc (20 mL × 3). The combined organic layers were washed with brine and dried over anhydrous Na<sub>2</sub>SO<sub>4</sub>. Then filtered and concentrated under reduced pressure. The residue was purified by a column chromatography on a silica gel with ethyl acetate/petroleum ether (1:50→1:20) as an eluent to give compound **6** as pale-yellow solid (1.7 g, 88% yield).

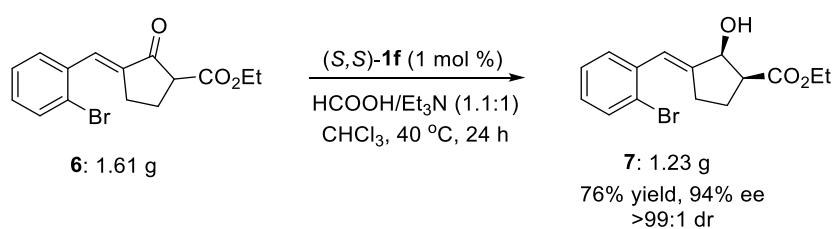

In a 30 mL Schlenk tube, formic acid (5.5 mmol, 208 μL), triethylamine (5.0 mmol, 695 μL), and 10 mL CHCl<sub>3</sub> were added. After stirring for 1 h, *(S,S)*-**1f** (0.025 mmol, 6.2 mg), compound **6** (1.61g, 5 mmol) were added. And then the mixture was stirred at 40°C for 24 h. The solvent was removed under reduced pressure. Saturated sodium bicarbonate (5 mL) was added and extracted 3 times with ethyl acetate. The combined organic layer was dried over Na<sub>2</sub>SO<sub>4</sub> and concentrated under reduced pressure. The residue was further purified by silica gel column to give compound **7** (1.23 g, 76% yield, 94% ee).

## 7. Analytical Data of the Products

*(S, E)*-2-benzylidenecyclopentanol (**3a**, known compound)<sup>[1]</sup>

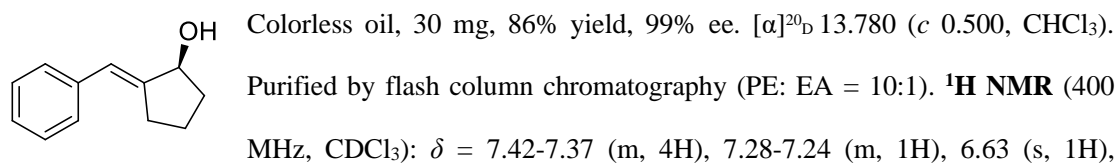

4.66-4.63 (m, 1H), 2.83-2.75 (m, 1H), 2.66-2.59 (m, 1H), 2.06-1.96 (m, 2H), 1.84-1.66 (m, 3H) ppm;  $^{13}\text{C}$  NMR (100 MHz,  $\text{CDCl}_3$ ):  $\delta$  = 147.83, 137.77, 128.43, 128.34, 126.62, 123.69, 77.39, 34.89, 29.39, 22.59 ppm. HPLC (Chiracel OD-H column, n-hexane/2-propanol = 90:10 (v/v), 1.0 mL/min, 254 nm, temp, r.t.),  $t_{\text{R}}$  = 8.98 min (minor),  $t_{\text{S}}$  = 10.13 min (major).

**(S, E)-2-(2-fluorobenzylidene)cyclopentanol (3b, unknown compound)**

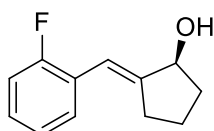

Yellow oil, 79% yield, 99% ee.  $[\alpha]_{\text{D}}^{20}$  16.037 (*c* 0.222,  $\text{CHCl}_3$ ). Purified by flash column chromatography (PE: EA = 8 :1).  $^1\text{H}$  NMR (400 MHz,  $\text{CDCl}_3$ ):  $\delta$  = 7.48-7.44 (m, 1H), 7.26-7.21 (m, 1H), 7.17-7.06 (m, 2H), 6.78 (s, 1H), 4.67-4.65 (m, 1H), 2.76-2.68 (m, 1H), 2.59-2.52 (m, 1H), 2.05-1.97 (m, 2H), 1.81-1.69 (m, 3H) ppm;  $^{13}\text{C}$  NMR (100 MHz,  $\text{CDCl}_3$ ):  $\delta$  = 160.18 (d,  $J_{\text{C-F}}$  = 246.7 Hz), 150.04, 129.13 (d,  $J_{\text{C-F}}$  = 3.2 Hz), 128.18 (d,  $J_{\text{C-F}}$  = 8.3 Hz), 125.54 (d,  $J_{\text{C-F}}$  = 12.7 Hz), 123.68 (d,  $J_{\text{C-F}}$  = 3.6 Hz), 115.40 (d,  $J_{\text{C-F}}$  = 9.7 Hz), 115.27 (d,  $J_{\text{C-F}}$  = 7.2 Hz), 77.09, 34.84, 29.17, 22.39 ppm. HRMS (ESI) calcd for  $\text{C}_{12}\text{H}_{13}\text{OFNa}$  ( $[\text{M} + \text{Na}]^+$ ): 215.0843; Found: 215.0847. HPLC (Chiracel OD-H column, n-hexane/2-propanol = 90:10 (v/v), 1.0 mL/min, 254 nm, temp, r.t.),  $t_{\text{R}}$  = 7.03 min (minor),  $t_{\text{S}}$  = 7.94 min (major).

**(S, E)-2-(2-chlorobenzylidene)cyclopentanol (3c, known compound) <sup>[3]</sup>**

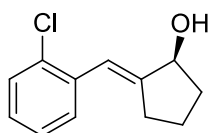

Colorless oil, 30 mg, 73% yield, 97% ee.  $[\alpha]_{\text{D}}^{20}$  16.201 (*c* 0.250,  $\text{CHCl}_3$ ). Purified by flash column chromatography (PE: EA = 10:1).  $^1\text{H}$  NMR (400 MHz,  $\text{CDCl}_3$ ):  $\delta$  = 7.46 (dd,  $J$  = 7.6, 1.6 Hz, 1H), 7.41 (dd,  $J$  = 8.0, 1.2 Hz, 1H), 7.27 (td,  $J$  = 7.6, 1.2 Hz, 1H), 7.19 (td,  $J$  = 7.6, 1.6 Hz, 1H), 6.87 (q,  $J$  = 2.4 Hz, 1H), 4.67 (s, 1H), 2.75-2.61 (m, 1H), 2.58-2.45 (m, 1H), 2.11-1.89 (m, 3H), 1.81-1.65 (m, 2H);  $^{13}\text{C}$  NMR (100 MHz,  $\text{CDCl}_3$ ):  $\delta$  = 150.12, 135.67, 133.61, 129.50, 129.38, 127.84, 126.39, 120.05, 76.84, 34.76, 28.89, 22.34. HPLC (Chiracel OD-H column, n-hexane/2-propanol = 90:10 (v/v), 1.0 mL/min, 254 nm, temp, r.t.),  $t_{\text{R}}$  = 7.77 min (minor),  $t_{\text{S}}$  = 9.81 min (major).

**(S, E)-2-(2-methylbenzylidene)cyclopentanol (3d, known compound) <sup>[3]</sup>**

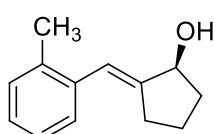

Yellow oil, 31 mg, 82% yield, 97% ee.  $[\alpha]_{\text{D}}^{20}$  23.019 (*c* 0.480,  $\text{CHCl}_3$ ). Purified by flash column chromatography (PE: EA = 10:1).  $^1\text{H}$  NMR (400

MHz, CDCl<sub>3</sub>):  $\delta$  = 7.39-7.33 (m, 1H), 7.25-7.14 (m, 3H), 6.72 (s, 1H), 4.65 (t,  $J$  = 5.6 Hz, 1H), 2.72-2.59 (m, 1H), 2.54-2.43 (m, 1H), 2.35 (s, 3H), 2.07-1.89 (m, 2H), 1.84 (s, 1H), 1.76-1.65 (m, 2H) ppm; <sup>13</sup>C NMR (100 MHz, CDCl<sub>3</sub>):  $\delta$  = 147.67, 137.84, 137.70, 129.25, 128.23, 127.44, 125.47, 123.78, 77.44, 34.89, 29.41, 22.61, 21.54 ppm. HPLC (Chiracel OD-H column, n-hexane/2-propanol = 90:10 (v/v), 1.0 mL/min, 254 nm, temp, r.t.),  $t_R$  = 7.11 min (minor),  $t_S$  = 8.54 min (major).

**(*S, E*)-2-(2-methoxybenzylidene)cyclopentanol (3e, known compound)** <sup>[3]</sup>

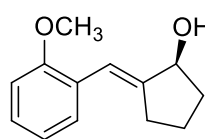

Colorless oil, 31 mg, 77% yield, 98% ee.  $[\alpha]_D^{20}$  34.153 ( $c$  0.165, CHCl<sub>3</sub>). Purified by flash column chromatography (PE: EA = 10:1). <sup>1</sup>H NMR (400 MHz, CDCl<sub>3</sub>):  $\delta$  = 7.41 (dd,  $J$  = 7.6, 1.2 Hz, 1H), 7.24 (td,  $J$  = 8.0, 1.6 Hz, 1H), 6.97 (td,  $J$  = 7.6, 1.2 Hz, 1H), 6.92-6.87 (m, 2H), 4.65 (s, 1H), 3.87 (s, 3H), 2.77-2.66 (m, 1H), 2.59-2.49 (m, 1H), 2.01-1.92 (m, 2H), 1.75-1.64 (m, 3H); <sup>13</sup>C NMR (100 MHz, CDCl<sub>3</sub>):  $\delta$  = 156.79, 147.98, 128.80, 127.94, 126.70, 120.21, 117.90, 110.40, 55.44, 34.77, 29.75, 29.12, 22.62. HPLC (Chiracel OD-H column, n-hexane/2-propanol = 90:10 (v/v), 1.0 mL/min, 254 nm, temp, r.t.),  $t_R$  = 11.64 min (minor),  $t_S$  = 24.24 min (major).

**(*S, E*)-2-(3-fluorobenzylidene)cyclopentanol (3f, known compound)** <sup>[3]</sup>

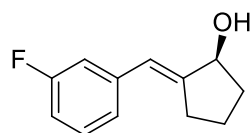

White oil, 27 mg, 71% yield, 98% ee.  $[\alpha]_D^{20}$  26.742 ( $c$  0.240, CHCl<sub>3</sub>). <sup>1</sup>H NMR (400 MHz, CDCl<sub>3</sub>):  $\delta$  = 7.36-7.28 (m, 1H), 7.15 (d,  $J$  = 7.8 Hz, 1H), 7.10 (d,  $J$  = 10.5 Hz, 1H), 6.95 (td,  $J$  = 8.2, 2.2 Hz, 1H), 6.58 (s, 1H), 4.62 (s, 1H), 2.73 (ddd,  $J$  = 8.7, 6.1, 3.0 Hz, 1H), 2.67-2.54 (m, 1H), 2.07-1.95 (m, 2H), 1.87 (s, 1H), 1.77 (dd,  $J$  = 8.2, 6.1 Hz, 1H), 1.72-1.63 (m, 1H); <sup>13</sup>C NMR (100 MHz, CDCl<sub>3</sub>):  $\delta$  = 162.8 (d,  $J_{C-F}$  = 243.1 Hz), 149.2, 140.2 (d,  $J_{C-F}$  = 7.7 Hz), 129.7 (d,  $J_{C-F}$  = 8.5 Hz), 124.3 (d,  $J_{C-F}$  = 2.7 Hz), 112.6 (d,  $J_{C-F}$  = 2.5 Hz), 114.8 (d,  $J_{C-F}$  = 21.7 Hz), 113.4 (d,  $J_{C-F}$  = 21.2 Hz), 77.2, 34.8, 29.4, 22.4 ppm. HPLC (Chiracel OD-H column, n-hexane/2-propanol = 90:10 (v/v), 1.0 mL/min, 254 nm, temp, r.t.),  $t_R$  = 7.62 min (minor),  $t_S$  = 8.24 min (major).

**(S, E)-2-(3-chlorobenzylidene)cyclopentanol (3g, known compound)** <sup>[3]</sup>

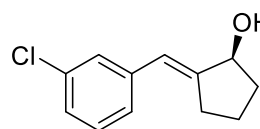

Yellow oil, 35 mg, 83% yield, 98% ee.  $[\alpha]_D^{20}$  14.570 (*c* 0.500, CHCl<sub>3</sub>).  
Purified by flash column chromatography (PE: EA = 10:1). **<sup>1</sup>H NMR**  
(400 MHz, CDCl<sub>3</sub>):  $\delta$  = 7.37-7.29 (m, 4H), 6.56 (d, *J* = 2.1 Hz, 1H),  
4.62 (td, *J* = 5.4, 4.6, 2.6 Hz, 1H), 2.84-2.52 (m, 2H), 2.08-1.97 (m, 2H), 1.87-1.62 (m, 3H) ppm;  
**<sup>13</sup>C NMR** (100 MHz, CDCl<sub>3</sub>):  $\delta$  = 148.40, 136.24, 132.20, 129.61, 128.48, 122.51, 77.29, 34.87,  
29.37, 22.46 ppm. HPLC (Chiracel OD-H column, n-hexane/2-propanol = 90:10 (v/v), 1.0  
mL/min, 254 nm, temp, r.t.), *t<sub>R</sub>* = 7.31 min (minor), *t<sub>S</sub>* = 8.13 min (major).

**(S, E)-2-(3-bromobenzylidene)cyclopentanol (3h, known compound)** <sup>[3]</sup>

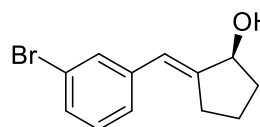

Yellow oil, 38 mg, 76% yield, 99% ee.  $[\alpha]_D^{20}$  18.315 (*c* 0.125, CHCl<sub>3</sub>).  
Purified by flash column chromatography (PE: EA = 10:1). **<sup>1</sup>H NMR**  
(400 MHz, CDCl<sub>3</sub>):  $\delta$  = 7.53 (t, *J* = 2.0 Hz, 1H), 7.36 (dt, *J* = 8.0, 1.6 Hz,  
1H), 7.31-7.28 (m, 1H), 7.25-7.19 (m, 1H), 6.53 (q, *J* = 2.4 Hz, 1H), 4.61 (s, 1H), 2.80-2.68 (m,  
1H), 2.66-2.55 (m, 1H), 2.05-1.95 (m, 2H), 1.82-1.62 (m, 3H) ppm; **<sup>13</sup>C NMR** (100 MHz, CDCl<sub>3</sub>):  
 $\delta$  = 149.4, 139.9, 131.1, 129.8, 129.5, 127.0, 122.5, 122.3, 77.2, 34.8, 29.4, 22.4 ppm. HPLC  
(Chiracel OD-H column, n-hexane/2-propanol = 90:10 (v/v), 1.0 mL/min, 254 nm, temp, r.t.), *t<sub>R</sub>* =  
8.09 min (minor), *t<sub>S</sub>* = 8.74 min (major).

**(S, E)-2-(3-methylbenzylidene)cyclopentanol (3i, unknown compound)**

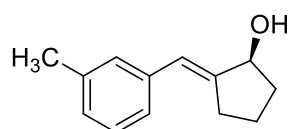

Yellow oil, 28 mg, 75% yield, 99% ee.  $[\alpha]_D^{20}$  9.998 (*c* 0.225, CHCl<sub>3</sub>).  
Purified by flash column chromatography (PE: EA = 10:1). **<sup>1</sup>H NMR**  
(400 MHz, CDCl<sub>3</sub>):  $\delta$  = 7.38-7.36 (m, 1H), 7.23-7.17 (m, 3H), 6.72 (s,  
1H), 4.66-4.66 (m, 1H), 2.71-2.63 (m, 1H), 2.53-2.45 (m, 1H), 2.36 (s, 3H), 2.05-1.92 (m, 3H),  
1.76-1.69 (m, 2H) ppm; **<sup>13</sup>C NMR** (100 MHz, CDCl<sub>3</sub>):  $\delta$  = 148.26, 136.59, 136.20, 130.01, 128.01,  
126.79, 125.56, 121.65, 76.86, 35.03, 28.81, 22.43, 20.04 ppm. HRMS (ESI) calcd for C<sub>13</sub>H<sub>16</sub>ONa  
([M + Na]<sup>+</sup>): 211.1093; Found: 211.1095. HPLC (Chiracel OD-H column, n-hexane/2-propanol =  
90:10 (v/v), 1.0 mL/min, 254 nm, temp, r.t.), *t<sub>R</sub>* = 7.63 min (minor), *t<sub>S</sub>* = 8.57 min (major).

**(S, E)-2-(3-methoxybenzylidene)cyclopentanol (3j, known compound)** <sup>[3]</sup>

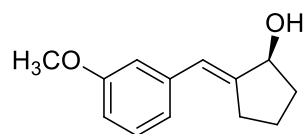

Colorless oil, 31 mg, 77% yield, 98% ee.  $[\alpha]_D^{20}$  34.153 (*c* 0.100, CHCl<sub>3</sub>). **<sup>1</sup>H NMR** (400 MHz, CDCl<sub>3</sub>):  $\delta$  = 7.30 (t, *J* = 7.9 Hz, 1H), 7.03-6.93 (m, 2H), 6.82 (ddd, *J* = 8.2, 2.7, 0.9 Hz, 1H), 6.59 (q, *J* = 2.4 Hz, 1H), 4.72-4.49 (m, 1H), 3.85 (s, 3H), 2.84-2.71 (m, 1H), 2.68-2.56 (m, 1H), 2.13-2.03 (m, 1H), 2.02- 1.93 (m, 2H), 1.81-1.64 (m, 2H); **<sup>13</sup>C NMR** (100 MHz, CDCl<sub>3</sub>):  $\delta$  = 159.50, 148.14, 139.23, 129.27, 123.51, 121.13, 113.96, 112.14, 77.46, 77.28, 77.14, 76.82, 55.21, 34.82, 29.44, 22.52. HPLC (Chiracel OD-H column, n-hexane/2-propanol = 90:10 (v/v), 1.0 mL/min, 254 nm, temp, r.t.), *t*<sub>S</sub> = 16.23 min (major), *t*<sub>R</sub> = 17.14 min (minor).

**(S, E)-2-(4-fluorobenzylidene)cyclopentanol (3k, known compound)** <sup>[3]</sup>

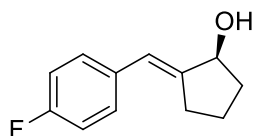

Colorless oil, 32 mg, 83% yield, 99% ee.  $[\alpha]_D^{20}$  17.362 (*c* 0.250, CHCl<sub>3</sub>). Purified by flash column chromatography (PE: EA = 10:1). **<sup>1</sup>H NMR** (400 MHz, Chloroform-*d*):  $\delta$  = 7.35 (dd, *J* = 8.7, 5.6 Hz, 2H), 7.11-7.01 (m, 2H), 6.58 (d, *J* = 2.1 Hz, 1H), 4.62 (dd, *J* = 6.5, 4.7 Hz, 1H), 2.72 (dtd, *J* = 11.6, 6.4, 2.3 Hz, 1H), 2.63 -2.53 (m, 1H), 2.00 (dq, *J* = 9.0, 6.3, 5.8 Hz, 2H), 1.86 (s, 1H), 1.81-1.64 (m, 2H); **<sup>13</sup>C NMR** (100 MHz, CDCl<sub>3</sub>):  $\delta$  = 161.5 (d, *J*<sub>C-F</sub> = 244.9 Hz), 147.3 (d, *J*<sub>C-F</sub> = 2.2 Hz), 133.9 (d, *J*<sub>C-F</sub> = 3.3 Hz), 129.9 (d, *J*<sub>C-F</sub> = 8.7 Hz), 115.2 (d, *J*<sub>C-F</sub> = 21.2 Hz), 77.3, 34.9, 29.2, 22.5 ppm. HPLC (Chiracel OD-H column, n-hexane/ 2-propanol = 90:10 (v/v), 1.0 mL/min, 254 nm, temp, r.t.), *t*<sub>S</sub> = 8.09 min (major), *t*<sub>R</sub> = 8.74 min (minor).

**(S, E)-2-(4-chlorobenzylidene)cyclopentanol (3l, known compound)** <sup>[3]</sup>

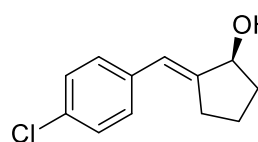

Yellow oil, 34 mg, 81% yield, 98% ee.  $[\alpha]_D^{20}$  9.998 (*c* 0.225, CHCl<sub>3</sub>). Purified by flash column chromatography (PE: EA = 10:1). **<sup>1</sup>H NMR** (400 MHz, CDCl<sub>3</sub>):  $\delta$  = 7.34-7.30 (m, 3H), 7.29-7.27 (m, 1H), 6.55 (q, *J* = 2.4 Hz, 1H), 4.61 (t, *J* = 6.0 Hz, 1H), 2.79-2.66 (m, 1H), 2.64-2.50 (m, 1H), 2.07-1.93 (m, 2H), 1.84-1.60 (m, 3H) ppm; **<sup>13</sup>C NMR** (100 MHz, CDCl<sub>3</sub>):  $\delta$  = 148.26, 136.59, 136.20, 130.01, 128.01, 126.79, 125.56, 121.65, 76.86, 35.03, 28.81, 22.43, 20.04 ppm. HPLC (Chiracel OD-H column,



n-hexane/2-propanol = 90:10 (v/v), 1.0 mL/min, 254 nm, temp, r.t.),  $t_R$  = 7.63 min (minor),  $t_S$  = 8.57 min (major).

**(S, E)-2-(4-bromobenzylidene)cyclopentanol (3m, known compound)** <sup>[3]</sup>

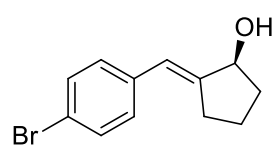

White solid, 40 mg, 79% yield, 98% ee. mp 70-72 °C.  $[\alpha]^{20}_D$  15.378 (*c* 0.200, CHCl<sub>3</sub>). Purified by flash column chromatography (PE: EA = 9:1). <sup>1</sup>H NMR (400 MHz, CDCl<sub>3</sub>):  $\delta$  = 7.49 (d, *J* = 8.4 Hz, 2H), 7.26 (d, *J* = 8.4 Hz, 2H), 6.56 (s, 1H), 4.63-4.61 (m, 1H), 2.77-2.70 (m, 1H), 2.62-2.54 (m, 1H), 2.05-1.97 (m, 2H), 1.83-1.69 (m, 3H) ppm; <sup>13</sup>C NMR (100 MHz, CDCl<sub>3</sub>):  $\delta$  = 148.63, 136.68, 131.43, 129.93, 122.55, 120.38, 77.31, 34.88, 29.38, 22.45 ppm. HPLC (Chiracel OD-H column, n-hexane/ 2-propanol = 90:10 (v/v), 1.0 mL/min, 254 nm, temp, r.t.),  $t_S$  = 7.58 min (major),  $t_R$  = 8.07 min (minor).

**(S, E)-2-(4-methylbenzylidene)cyclopentanol (3n, known compound)** <sup>[3]</sup>

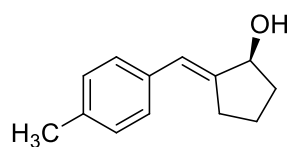

Yellow oil, 30 mg, 80% yield, 98% ee.  $[\alpha]^{20}_D$  3.944 (*c* 0.240, CHCl<sub>3</sub>). Purified by flash column chromatography (PE: EA = 10:1). <sup>1</sup>H NMR (400 MHz, CDCl<sub>3</sub>):  $\delta$  = 7.31 (d, *J* = 8.0 Hz, 2H), 7.20 (d, *J* = 8.0 Hz, 2H), 6.60-6.59 (s, 1H), 4.65-4.62 (m, 1H), 2.81-2.73 (m, 1H), 2.65-2.57 (m, 1H), 2.39 (s, 3H), 2.05-1.96 (m, 2H), 1.82-1.67 (m, 3H) ppm; <sup>13</sup>C NMR (100 MHz, CDCl<sub>3</sub>):  $\delta$  = 146.82, 136.38, 134.95, 129.05, 128.35, 123.61, 77.45, 34.92, 29.39, 22.66, 21.20 ppm. HPLC (Chiracel OD-H column, n-hexane/2-propanol = 90:10 (v/v), 1.0 mL/min, 254 nm, temp, r.t.),  $t_S$  = 7.70 min (major),  $t_R$  = 8.32 min (minor).

**(S, E)-2-(4-methoxybenzylidene)cyclopentanol (3o, known compound)** <sup>[3]</sup>

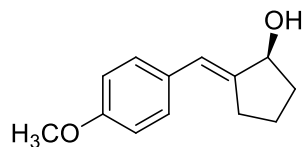

White oil, 33 mg, 81% yield, 98% ee.  $[\alpha]^{20}_D$  40.357 (*c* 0.100, CHCl<sub>3</sub>). Purified by flash column chromatography (PE: EA = 10:1). <sup>1</sup>H NMR (400 MHz, CDCl<sub>3</sub>):  $\delta$  = 7.35 (d, *J* = 8.8 Hz, 2H), 6.97-6.89 (m, 2H), 6.57 (d, *J* = 2.0 Hz, 1H), 4.77-4.49 (m, 1H), 3.86 (s, 3H), 2.82-2.69 (m, 1H), 2.64-2.52 (m, 1H), 2.09-1.92 (m, 2H), 1.79 (ddd, *J* = 12.4, 6.1, 2.1 Hz, 1H), 1.72-1.67 (m, 2H); <sup>13</sup>C NMR (100 MHz, CDCl<sub>3</sub>):  $\delta$  = 158.26, 145.47, 130.63, 129.65, 123.21, 113.78, 77.45, 55.28, 34.92,

29.31, 22.71. HPLC (Chiracel OD-H column, n-hexane/2-propanol = 90:10 (v/v), 1.0 mL/min, 254 nm, temp, r.t.),  $t_s$  = 9.19 min (major),  $t_R$  = 10.02 min (minor).

**(S, E)-2-(4-(tert-butyl)benzylidene)cyclopentanol (3p, known compound)** <sup>[3]</sup>

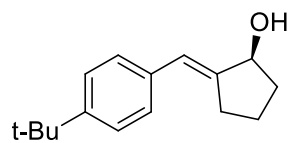

White oil, 39 mg, 85% yield, 98% ee.  $[\alpha]_D^{20}$  23.104 (*c* 0.250, CHCl<sub>3</sub>).

Purified by flash column chromatography (PE: EA = 10:1). <sup>1</sup>H NMR

(400 MHz, CDCl<sub>3</sub>):  $\delta$  = 7.42 (d, *J* = 8.5 Hz, 2H), 7.35 (d, *J* = 8.5 Hz,

2H), 6.60 (d, *J* = 2.0 Hz, 1H), 4.63 (s, 1H), 2.87-2.72 (m, 1H), 2.70-2.56 (m, 1H), 2.05-1.94 (m,

2H), 1.85-1.66 (m, 3H), 1.37 (s, 9H); <sup>13</sup>C NMR (100 MHz, CDCl<sub>3</sub>):  $\delta$  = 149.63, 147.05, 134.94,

128.17, 125.26, 123.46, 77.47, 34.91, 34.55, 31.32, 29.74, 29.39, 22.66. HPLC (Chiracel OD-H

column, n-hexane/2-propanol = 90:10 (v/v), 1.0 mL/min, 254 nm, temp, r.t.),  $t_R$  = 6.68 min

(minor),  $t_s$  = 7.29 min (major).

**(S, E)-2-(2,4,6-trimethylbenzylidene)cyclopentanol (3q, known compound)** <sup>[3]</sup>

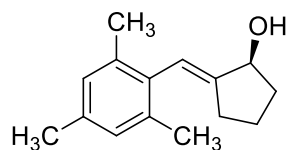

Colorless oil, 29 mg, 67% yield, 98% ee.  $[\alpha]_D^{20}$  20.179 (*c* 0.100,

CHCl<sub>3</sub>). Purified by flash column chromatography (PE: EA = 10:1).

<sup>1</sup>H NMR (400 MHz, CDCl<sub>3</sub>):  $\delta$  = 6.82 (s, 2H), 6.30 (d, *J* = 2.6 Hz,

1H), 4.92 (d, *J* = 5.2 Hz, 1H), 4.41 (d, *J* = 5.6 Hz, 1H), 2.21 (s, 3H), 2.11 (s, 6H), 1.98-1.78 (m,

3H), 1.76-1.64 (m, 1H), 1.56-1.43 (m, 2H); <sup>13</sup>C NMR (100 MHz, CDCl<sub>3</sub>):  $\delta$  = 149.07, 135.45,

135.27, 134.76, 128.12, 120.20, 74.05, 35.39, 27.86, 21.46, 21.03, 20.26. HPLC (Chiracel OD-H

column, n-hexane/2-propanol = 90:10 (v/v), 1.0 mL/min, 254 nm, temp, r.t.),  $t_R$  = 5.06 min

(minor),  $t_s$  = 5.36 min (major).

**(S, E)-2-(naphthalen-1-ylmethylene)cyclopentanol (3r, known compound)** <sup>[3]</sup>

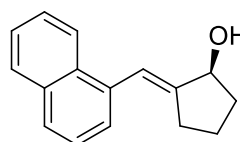

Yellow oil, 37 mg, 82% yield, 98% ee.  $[\alpha]_D^{20}$  8.630 (*c* 0.250,

CHCl<sub>3</sub>). Purified by flash column chromatography (PE: EA = 10:1). <sup>1</sup>H

NMR (400 MHz, CDCl<sub>3</sub>):  $\delta$  = 8.14-8.06 (m, 1H), 7.93-7.85 (m, 1H), 7.79

(t, *J* = 4.8 Hz, 1H), 7.57-7.45 (m, 4H), 7.21 (q, *J* = 2.4 Hz, 1H), 4.76 (t, *J* = 6.0 Hz, 1H), 2.71-2.58

(m, 1H), 2.53-2.40 (m, 1H), 2.13-2.02 (m, 1H), 1.99-1.82 (m, 2H), 1.78-1.66 (m, 2H); <sup>13</sup>C NMR

(100 MHz, CDCl<sub>3</sub>):  $\delta$  = 149.92, 134.74, 133.59, 131.67, 128.54, 127.27, 125.88, 125.86, 125.75, 125.33, 124.44, 120.69, 76.64, 35.15, 28.85, 22.24. HPLC (Chiracel OD-H column, n-hexane/2-propanol = 90:10 (v/v), 1.0 mL/min, 254 nm, temp, r.t.),  $t_S$  = 15.94 min (major),  $t_R$  = 17.14 min (minor).

**(S, E)-2-(naphthalen-2-ylmethylene)cyclopentanol (3s, known compound)** <sup>[3]</sup>

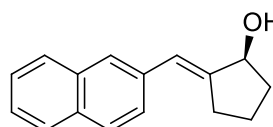

Yellow oil, 41 mg, 91% yield, 98% ee.  $[\alpha]_D^{20}$  12.699 (*c* 0.250, CHCl<sub>3</sub>). Purified by flash column chromatography (PE: EA = 10:1). **<sup>1</sup>H NMR** (400 MHz, CDCl<sub>3</sub>):  $\delta$  = 7.90-7.80 (m, 4H), 7.57 (dd, *J* = 8.6, 1.7 Hz, 1H), 7.54-7.47 (m, 2H), 6.78 (d, *J* = 2.1 Hz, 1H), 4.73-4.67 (m, 1H), 2.98-2.83 (m, 1H), 2.81-2.67 (m, 1H), 2.05 (ddq, *J* = 12.5, 10.0, 5.8 Hz, 2H), 1.86-1.71 (m, 3H); **<sup>13</sup>C NMR** (100 MHz, CDCl<sub>3</sub>):  $\delta$  = 148.34, 135.37, 133.49, 132.20, 128.05, 127.81, 127.59, 127.25, 126.79, 126.14, 125.79, 123.77, 77.48, 34.93, 29.56, 22.62. HPLC (Chiracel OD-H column, n-hexane/2-propanol = 90:10 (v/v), 1.0 mL/min, 254 nm, temp, r.t.),  $t_S$  = 10.60 min (major),  $t_R$  = 11.44 min (minor).

**(S, E)-2-(pyridin-2-ylmethylene)cyclopentanol (3t, known compound)** <sup>[3]</sup>

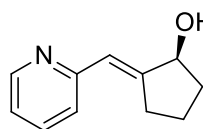

Red oil, 27 mg, 77% yield, 99% ee.  $[\alpha]_D^{20}$  6.137 (*c* 0.050, CHCl<sub>3</sub>). Purified by flash column chromatography (PE: EA = 10:1). **<sup>1</sup>H NMR** (400 MHz, CDCl<sub>3</sub>):  $\delta$  = 8.62 (dd, *J* = 5.0, 1.7 Hz, 1H), 7.69 (td, *J* = 7.8, 1.9 Hz, 1H), 7.34 (d, *J* = 7.9 Hz, 1H), 7.13 (dd, *J* = 7.5, 4.9 Hz, 1H), 6.75 (d, *J* = 2.3 Hz, 1H), 4.66 (s, 1H), 3.02-2.86 (m, 1H), 2.86-2.72 (m, 1H), 2.33 (s, 1H), 2.08-1.98 (m, 2H), 1.78-1.66 (m, 2H); **<sup>13</sup>C NMR** (100 MHz, CDCl<sub>3</sub>):  $\delta$  = 156.66, 153.39, 149.02, 136.25, 123.35, 122.82, 120.97, 34.79, 30.01, 22.22. HPLC (Chiracel OD-H column, n-hexane/2-propanol = 90:10 (v/v), 1.0 mL/min, 254 nm, temp, r.t.),  $t_R$  = 10.39 min (minor),  $t_S$  = 13.83 min (major).

**(S, E)-2-(furan-2-ylmethylene)cyclopentanol (3u, known compound)** <sup>[3]</sup>

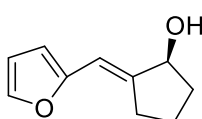

Yellow oil, 21 mg, 63% yield, 98% ee.  $[\alpha]_D^{20}$  23.794 (*c* 0.200, CHCl<sub>3</sub>). Purified by flash column chromatography (PE: EA = 10:1). **<sup>1</sup>H NMR** (400 MHz, CDCl<sub>3</sub>):  $\delta$  = 7.42 (s, 1H), 6.47 (d, *J* = 18.8 Hz, 2H), 6.27 (d, *J* = 2.8 Hz,

1H), 4.64-6.57 (m, 1H), 2.78-2.54 (m, 2H), 2.05-1.95 (m, 2H), 1.91 (s, 1H), 1.80-1.62 (m, 2H) ppm;  $^{13}\text{C}$  NMR (100 MHz,  $\text{CDCl}_3$ ):  $\delta$  = 153.56, 146.30, 141.46, 112.24, 111.34, 108.14, 76.62, 35.45, 29.72, 22.15 ppm. HPLC (Chiracel OD-H column, n-hexane/ 2-propanol = 90:10 (v/v), 1.0 mL/min, 254 nm, temp, r.t.),  $t_{\text{S}}$  = 7.33 min (major),  $t_{\text{R}}$  = 7.85 min (minor).

**(S, E)-2-(2-phenylethylidene)cyclopentanol (3v, known compound)** <sup>[3]</sup>

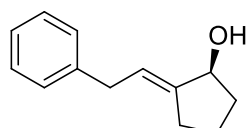

Yellow oil, 33 mg, 87% yield, 94% ee.  $[\alpha]_{\text{D}}^{20}$  8.290 (*c* 0.100,  $\text{CHCl}_3$ ). Purified by flash column chromatography (PE: EA = 10:1).  $^1\text{H}$  NMR (400 MHz,  $\text{CDCl}_3$ ):  $\delta$  = 7.34 (dd, *J* = 8.5, 6.7 Hz, 2H), 7.25 (dd, *J* = 7.6, 5.3 Hz, 3H), 5.79 (ddd, *J* = 9.3, 4.8, 1.9 Hz, 1H), 4.49 (d, *J* = 5.9 Hz, 1H), 3.42 (d, *J* = 7.4 Hz, 2H), 2.55 (dt, *J* = 14.6, 4.5 Hz, 1H), 2.43-2.30 (m, 1H), 2.00-1.89 (m, 2H), 1.72 (dq, *J* = 10.8, 5.8 Hz, 2H), 1.52 (s, 1H);  $^{13}\text{C}$  NMR (100 MHz,  $\text{CDCl}_3$ ):  $\delta$  = 146.84, 140.83, 128.51, 128.35, 126.00, 122.76, 75.65, 35.70, 35.65, 27.21, 22.02. HPLC (Chiracel OD-H column, n-hexane/2-propanol = 90:10 (v/v), 1.0 mL/min, 254 nm, temp, r.t.),  $t_{\text{S}}$  = 7.42 min (major),  $t_{\text{R}}$  = 8.09 min (minor).

**(S, E)-2-(cyclohexylmethylene)cyclopentanol (3w, known compound)** <sup>[3]</sup>

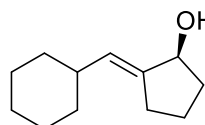

Yellow oil, 30 mg, 83% yield, 93% ee.  $[\alpha]_{\text{D}}^{20}$  17.326 (*c* 0.100,  $\text{CHCl}_3$ ). Purified by flash column chromatography (PE: EA = 10:1).  $^1\text{H}$  NMR (400 MHz,  $\text{CDCl}_3$ ):  $\delta$  = 5.41 (dd, *J* = 9.2, 2.0 Hz, 1H), 4.40 (t, *J* = 4.8 Hz, 1H), 2.53-2.35 (m, 1H), 2.30-2.17 (m, 1H), 2.14-2.02 (m, 1H), 1.94-1.81 (m, 2H), 1.78-1.64 (m, 7H), 1.38-1.00 (m, 6H);  $^{13}\text{C}$  NMR (100 MHz,  $\text{CDCl}_3$ ):  $\delta$  = 144.0, 130.20, 75.7, 38.5, 35.5, 32.8, 32.8, 26.8, 26.1, 26.0, 22.0. HPLC (Chiracel OJ-H column, n-hexane/2-propanol = 79:1 (v/v), 0.5 mL/min, 254 nm, temp, r.t.),  $t_{\text{R}}$  = 6.32 min (minor),  $t_{\text{S}}$  = 8.30 min (major).

**(S, E)-2-benzylidenecyclobutanol (5a, known compound)** <sup>[4]</sup>

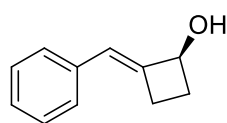

White solid, 30 mg, 93% yield, 96% ee.  $[\alpha]_{\text{D}}^{20}$  45.270 (*c* 0.250,  $\text{CHCl}_3$ ). Mp 76-78 °C. Purified by flash column chromatography (PE: EA = 10:1).  $^1\text{H}$  NMR (400 MHz,  $\text{CDCl}_3$ ):  $\delta$  = 7.41-7.34 (m, 2H), 7.33-7.28 (m, 2H),

7.28-7.22 (m, 1H), 6.48 (d,  $J = 2.4$  Hz, 1H), 5.07-4.67 (m, 1H), 2.91-2.78 (m, 1H), 2.72 (dtd,  $J = 15.8, 8.9, 2.6$  Hz, 1H), 2.56 (dddd,  $J = 11.6, 8.8, 8.0, 3.7$  Hz, 1H), 2.01 (tdd,  $J = 10.6, 9.0, 7.2$  Hz, 2H);  $^{13}\text{C}$  NMR (100 MHz,  $\text{CDCl}_3$ ):  $\delta = 147.91, 136.79, 128.46, 127.81, 126.71, 120.07, 72.24, 32.01, 25.18$ . HPLC (Chiracel OD-H column, n-hexane/2-propanol = 90:10 (v/v), 1.0 mL/min, 254 nm, temp, r.t.),  $t_{\text{R}} = 7.95$  min (minor),  $t_{\text{S}} = 10.33$  min (major).

**(S, E)-2-(2-chlorobenzylidene)cyclobutanol (5b, known compound)** <sup>[4]</sup>

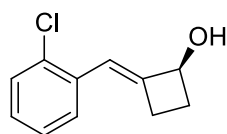

White solid, 37 mg, 96% yield, 95% ee.  $[\alpha]_{\text{D}}^{20} 63.253$  ( $c$  0.250,  $\text{CHCl}_3$ ). Mp 84-86 °C. Purified by flash column chromatography (PE: EA = 10:1).  $^1\text{H}$  NMR (400 MHz,  $\text{CDCl}_3$ ):  $\delta = 7.41$  (dd,  $J = 7.8, 1.4$  Hz, 1H), 7.35 (dd,  $J = 7.8, 1.6$  Hz, 1H), 7.28-7.22 (m, 1H), 7.19 (td,  $J = 7.6, 1.8$  Hz, 1H), 6.84 (q,  $J = 2.4$  Hz, 1H), 4.89 (d,  $J = 7.8$  Hz, 1H), 2.80-2.63 (m, 2H), 2.61-2.51 (m, 1H), 2.15 (s, 1H), 2.06-1.94 (m, 1H);  $^{13}\text{C}$  NMR (100 MHz,  $\text{CDCl}_3$ ):  $\delta = 150.43, 134.32, 133.13, 129.71, 128.77, 127.85, 126.48, 116.10, 72.24, 31.80, 24.87$ . HPLC (Chiracel OD-H column, n-hexane/2-propanol = 90:10 (v/v), 1.0 mL/min, 254 nm, temp, r.t.),  $t_{\text{R}} = 7.78$  min (minor),  $t_{\text{S}} = 10.86$  min (major).

**(S, E)-2-(2-methylbenzylidene)cyclobutanol (5c, known compound)** <sup>[4]</sup>

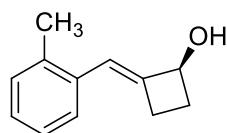

White solid, 31 mg, 88% yield, 94% ee.  $[\alpha]_{\text{D}}^{20} 47.695$  ( $c$  0.250,  $\text{CHCl}_3$ ). Mp 102-104 °C. Purified by flash column chromatography (PE: EA = 10:1).  $^1\text{H}$  NMR (400 MHz,  $\text{CDCl}_3$ ):  $\delta = 7.29$  (d,  $J = 7.6$  Hz, 1H), 7.25-7.14 (m, 3H), 6.65 (d,  $J = 2.4$  Hz, 1H), 4.90 (s, 1H), 2.77-2.64 (m, 2H), 2.55 (ddt,  $J = 10.8, 8.4, 4.2$  Hz, 1H), 2.40 (s, 3H), 2.14 (s, 1H), 2.04-1.94 (m, 1H);  $^{13}\text{C}$  NMR (100 MHz,  $\text{CDCl}_3$ ):  $\delta = 148.24, 135.77, 135.07, 130.34, 127.51, 126.82, 125.73, 117.27, 72.26, 31.90, 24.92, 19.95$ . HPLC (Chiracel OD-H column, n-hexane/2-propanol = 90:10 (v/v), 1.0 mL/min, 254 nm, temp, r.t.),  $t_{\text{R}} = 8.24$  min (minor),  $t_{\text{S}} = 12.52$  min (major).

**(E)-2-(3-bromobenzylidene)cyclobutanol (5d, known compound)** <sup>[4]</sup>

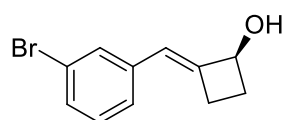

White solid, 40 mg, 85% yield, 97% ee.  $[\alpha]_{\text{D}}^{20} 56.430$  ( $c$  0.250,  $\text{CHCl}_3$ ). Mp 91-93°C. Purified by flash column chromatography (PE: EA =

10:1). **<sup>1</sup>H NMR** (400 MHz, CDCl<sub>3</sub>):  $\delta$  = 7.42 (s, 1H), 7.36 (dt,  $J$  = 6.8, 2.2 Hz, 1H), 7.21 (d,  $J$  = 6.6 Hz, 2H), 6.39 (d,  $J$  = 2.4 Hz, 1H), 4.88 (s, 1H), 2.85-2.75 (m, 1H), 2.74-2.64 (m, 1H), 2.59-2.46 (m, 2H), 2.01 (tdd,  $J$  = 10.7, 9.0, 7.2 Hz, 1H). **<sup>13</sup>C NMR** (100 MHz, CDCl<sub>3</sub>):  $\delta$  = 149.66, 138.90, 130.55, 129.97, 129.56, 126.36, 122.59, 118.75, 72.01, 31.76, 25.11. HPLC (Chiracel OD-H column, n-hexane/2-propanol = 90:10 (v/v), 1.0 mL/min, 254 nm, temp, r.t.),  $t_R$  = 8.14 min (minor),  $t_S$  = 8.91 min (major).

**(*S, E*)-2-(3-methylbenzylidene)cyclobutanol (5e, known compound )** <sup>[4]</sup>

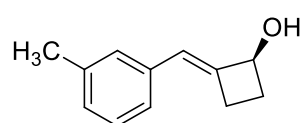

White solid, 33 mg, 94% yield, 98% ee.  $[\alpha]^{20}_D$  60.153 ( $c$  0.250, CHCl<sub>3</sub>). Mp 64-67 °C. Purified by flash column chromatography (PE: EA = 10:1). **<sup>1</sup>H NMR** (400 MHz, CDCl<sub>3</sub>):  $\delta$  = 7.27 (t,  $J$  = 7.8 Hz, 1H), 7.15-7.10 (m, 2H), 7.08 (d,  $J$  = 7.6 Hz, 1H), 6.45 (d,  $J$  = 2.5 Hz, 1H), 4.94-4.83 (m, 1H), 2.91-2.78 (m, 1H), 2.76-2.65 (m, 1H), 2.55 (dddd,  $J$  = 11.5, 8.8, 8.0, 3.7 Hz, 1H), 2.40 (s, 3H), 2.22 (s, 1H), 2.07-1.94 (m, 1H); **<sup>13</sup>C NMR** (100 MHz, CDCl<sub>3</sub>):  $\delta$  = 147.73 , 138.00 , 136.77 , 128.62 , 128.37 , 127.52 , 124.90, 120.10, 72.21, 31.94 , 25.23 , 21.53. HPLC (Chiracel OD-H column, n-hexane/2-propanol = 90:10 (v/v), 1.0 mL/min, 254 nm, temp, r.t.),  $t_R$  = 7.51 min (minor),  $t_S$  = 9.10 min (major).

**(*S, E*)-2-(4-(trifluoromethyl)benzylidene)cyclobutanol (5f, known compound )** <sup>[4]</sup>

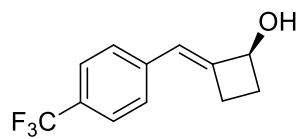

White solid, 41 mg, 89% yield, 98% ee.  $[\alpha]^{20}_D$  24.375 ( $c$  0.250, CHCl<sub>3</sub>). Mp 95-97 °C. Purified by flash column chromatography (PE: EA = 10:1). **<sup>1</sup>H NMR** (400 MHz, CDCl<sub>3</sub>):  $\delta$  = 7.63 (dd,  $J$  = 29.3, 8.1 Hz, 2H), 7.41 (dd,  $J$  = 29.0, 8.1 Hz, 2H), 6.62-6.44 (m, 1H), 4.93 (dd,  $J$  = 20.0, 11.0 Hz, 1H), 2.93-2.69 (m, 2H), 2.66-2.39 (m, 2H), 2.18-1.98 (m, 1H); **<sup>13</sup>C NMR** (100 MHz, CDCl<sub>3</sub>):  $\delta$  = 150.9 (d,  $J_{C-F}$  = 6.9 Hz), 140.3, 127.6, 127.8, 125.4 (m), 118.9 (d,  $J_{C-F}$  = 6.9 Hz), 72.0 (d,  $J_{C-F}$  = 6.2 Hz), 31.7 (d,  $J_{C-F}$  = 5.1 Hz), 25.2 (d,  $J_{C-F}$  = 7.1 Hz) ppm. HPLC (Chiracel AD-H column, n-hexane/2-propanol = 90:10 (v/v), 1.0 mL/min, 254 nm, temp, r.t.),  $t_R$  = 7.68 min (minor),  $t_S$  = 9.12 min (major).

**(*S,E*)-2-(4-chlorobenzylidene)cyclobutanol (5g, known compound)** <sup>[4]</sup>

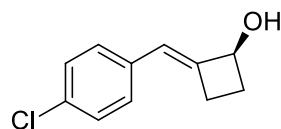

White solid, 33 mg, 85% yield, 99% ee.  $[\alpha]_D^{20}$  26.184 (*c* 0.250, CHCl<sub>3</sub>). Mp 72-74 °C. Purified by flash column chromatography (PE: EA = 10:1). **<sup>1</sup>H NMR** (400 MHz, CDCl<sub>3</sub>):  $\delta$  = 7.35-7.31 (m, 2H), 7.22 (d, *J* = 8.5 Hz, 2H), 6.43 (q, *J* = 2.4 Hz, 1H), 4.88 (ddt, *J* = 7.5, 5.5, 2.6 Hz, 1H), 2.88-2.62 (m, 2H), 2.61-2.51 (m, 1H), 2.01 (tdd, *J* = 10.7, 8.9, 7.1 Hz, 2H); **<sup>13</sup>C NMR** (100 MHz, CDCl<sub>3</sub>):  $\delta$  = 148.58, 135.26, 132.31, 128.97, 128.61, 119.00, 72.14, 31.90, 25.09. HPLC (Chiracel AD-H column, n-hexane/2-propanol = 90:10 (v/v), 1.0 mL/min, 254 nm, temp, r.t.), *t<sub>R</sub>* = 8.21 min (minor), *t<sub>S</sub>* = 9.71 min (major).

**(*S,E*)-2-(4-methylbenzylidene)cyclobutanol (5h, known compound)** <sup>[4]</sup>

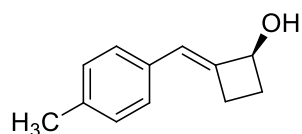

White solid, 33 mg, 94% yield, 98% ee.  $[\alpha]_D^{20}$  72.396 (*c* 0.250, CHCl<sub>3</sub>). Mp 84-86 °C. Purified by flash column chromatography (PE: EA = 10:1). **<sup>1</sup>H NMR** (400 MHz, CDCl<sub>3</sub>):  $\delta$  = 7.25-7.15 (m, 4H), 6.45 (d, *J* = 2.5 Hz, 1H), 4.88 (s, 1H), 2.88-2.77 (m, 1H), 2.75-2.65 (m, 1H), 2.55 (dtd, *J* = 8.8, 7.6, 4.4 Hz, 1H), 2.47 (s, 1H), 2.40 (s, 3H), 2.01 (tdd, *J* = 10.6, 8.8, 7.0 Hz, 1H); **<sup>13</sup>C NMR** (100 MHz, CDCl<sub>3</sub>):  $\delta$  = 146.81, 136.44, 134.06, 129.19, 127.76, 119.97, 72.17, 31.92, 25.17, 21.25. HPLC (Chiracel AD-H column, n-hexane/2-propanol = 95:5 (v/v), 1.0 mL/min, 254 nm, temp, r.t.), *t<sub>R</sub>* = 12.07 min (minor), *t<sub>S</sub>* = 14.34 min (major).

**(*S,E*)-2-(naphthalen-2-ylmethylene)cyclobutanol (5i, known compound)** <sup>[4]</sup>

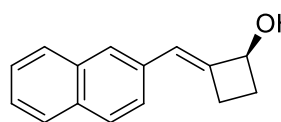

White solid, 38 mg, 91% yield, 93% ee.  $[\alpha]_D^{20}$  47.221 (*c* 0.250, CHCl<sub>3</sub>). Mp 141-143 °C. Purified by flash column chromatography (PE: EA = 10:1). **<sup>1</sup>H NMR** (400 MHz, CDCl<sub>3</sub>):  $\delta$  = 7.88-7.80 (m, 3H), 7.72 (s, 1H), 7.54-7.45 (m, 3H), 6.64 (q, *J* = 2.4 Hz, 1H), 4.94 (q, *J* = 8.4 Hz, 1H), 3.00-2.76 (m, 2H), 2.66-2.53 (m, 1H), 2.16-1.98 (m, 1H); **<sup>13</sup>C NMR** (100 MHz, CDCl<sub>3</sub>):  $\delta$  = 150.87, 135.10, 133.70, 132.11, 128.33, 128.19, 127.93, 126.68, 126.37, 126.22, 126.08, 119.01, 71.21, 31.17,

25.29. HPLC (Chiracel AD-H column, n-hexane/2-propanol = 90:10 (v/v), 1.0 mL/min, 254 nm, temp, r.t.),  $t_R$  = 9.38 min (minor),  $t_S$  = 10.87 min (major).

**(*S,E*)-2-benzylidenecyclohexanol (5j, known compound)** <sup>[1]</sup>

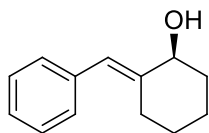

White solid, 34 mg, 91% yield, 88% ee. mp 82–83 °C.  $[\alpha]^{25}_D$  -3.386 (*c* 0.244, CHCl<sub>3</sub>). Purified by flash column chromatography (PE: EA = 10:1). **<sup>1</sup>H NMR** (400 MHz, CDCl<sub>3</sub>):  $\delta$  = 7.39-7.35 (m, 2H), 7.27-7.24 (m, 3H), 6.57 (s, 1H), 4.30-4.27 (m, 1H), 2.80-2.73 (m, 1H), 2.20-2.14 (m, 1H), 2.08-2.03 (m, 1H), 1.95-1.89 (m, 1H), 1.72-1.66 (m, 3H), 1.58-1.49 (m, 2H) ppm; **<sup>13</sup>C NMR** (100 MHz, CDCl<sub>3</sub>):  $\delta$  = 144.37, 137.68, 128.95, 128.12, 126.26, 120.82, 73.79, 36.59, 27.38, 27.01, 23.23 ppm. HPLC (Chiracel OD-H column, n-hexane/2-propanol = 90:10 (v/v), 1.0 mL/min, 254 nm, temp, r.t.),  $t_R$  = 6.42 min (minor),  $t_S$  = 7.79 min (major).

**(*S,E*)-2-(2-fluorobenzylidene)cyclohexanol (5k, known compound)** <sup>[1]</sup>

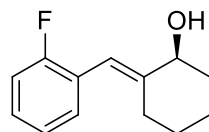

Yellow oil, 32 mg, 79% yield, 92% ee.  $[\alpha]^{20}_D$  -18.223 (*c* 0.420, CHCl<sub>3</sub>). Purified by flash column chromatography (PE: EA = 8:1). **<sup>1</sup>H NMR** (400 MHz, CDCl<sub>3</sub>):  $\delta$  = 7.28-7.22 (m, 2H), 7.15-7.06 (m, 2H), 6.49 (s, 1H), 4.32-4.29 (m, 1H), 2.66-2.60 (m, 1H), 2.11-2.04 (m, 2H), 1.94-1.88 (m, 1H), 1.80 (s, 1H), 1.70-1.47 (m, 4H) ppm; **<sup>13</sup>C NMR** (100 MHz, CDCl<sub>3</sub>):  $\delta$  = 160.24 (d,  $J_{C-F}$  = 244.5 Hz), 146.75, 130.98 (d,  $J_{C-F}$  = 3.8 Hz), 128.17 (d,  $J_{C-F}$  = 8.0 Hz), 125.26 (d,  $J_{C-F}$  = 15.3 Hz), 123.57 (d,  $J_{C-F}$  = 3.6 Hz), 115.38 (d,  $J_{C-F}$  = 22.2 Hz), 113.56 (d,  $J_{C-F}$  = 2.5 Hz), 73.60, 36.62, 27.68, 27.24, 23.32 ppm. HPLC (Chiracel OD-H column, n-hexane/2-propanol = 90:10 (v/v), 1.0 mL/min, 254 nm, temp, r.t.),  $t_R$  = 5.39 min (minor),  $t_S$  = 6.34 min (major).

**(*S,E*)-2-(2-chlorobenzylidene)cyclohexanol (5l, unknown compound)**

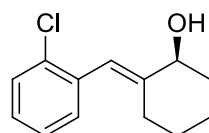

Yellow oil, 32 mg, 72% yield, 76% ee.  $[\alpha]^{20}_D$  -12.280 (*c* 0.442, CHCl<sub>3</sub>). Purified by flash column chromatography (PE: EA = 10:1). **<sup>1</sup>H NMR** (400 MHz, CDCl<sub>3</sub>):  $\delta$  = 7.42 (d,  $J$  = 7.2 Hz, 1H), 7.28-7.19 (m, 3H), 6.57 (s, 1H), 4.34-4.31 (m, 1H), 2.63-2.57 (m, 1H), 2.12-2.01 (m, 2H), 1.95-1.89 (m, 1H), 1.78 (s, 1H), 1.72-1.67 (m, 1H), 1.64-1.48 (m, 3H) ppm; **<sup>13</sup>C NMR** (100 MHz, CDCl<sub>3</sub>):  $\delta$  = 145.82, 136.08,



133.96, 130.82, 129.31, 127.81, 126.21, 118.15, 73.52, 36.67, 27.42, 27.34, 23.33 ppm. HRMS (ESI) calcd for  $C_{13}H_{15}OCiNa$  ( $[M + Na]^+$ ): 245.0704; Found: 245.0702. HPLC (Chiracel OD-H column, n-hexane/2-propanol = 90:10 (v/v), 1.0 mL/min, 254 nm, temp, r.t.),  $t_R$  = 5.89 min (minor),  $t_S$  = 8.02 min (major).

**(S, E)-2-(2-methylbenzylidene)cyclohexanol (5m, unknown compound)**

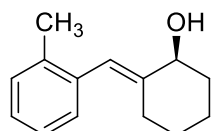

Yellow oil, 32 mg, 80% yield, 83% ee.  $[\alpha]^{20}_D$  -13.131 (*c* 0.554,  $CHCl_3$ ).

Purified by flash column chromatography (PE: EA = 10:1).  $^1H$  NMR (400

MHz,  $CDCl_3$ ):  $\delta$  = 7.24-7.17 (m, 3H), 7.15-7.12 (m, 1H), 6.51 (s, 1H),

4.33-4.30 (m, 1H), 2.59-2.53 (m, 1H), 2.29 (s, 3H), 2.10-1.98 (m, 3H), 1.94-1.87 (m, 1H),

1.67-1.54 (m, 3H), 1.51-1.44 (m, 1H) ppm;  $^{13}C$  NMR (100 MHz,  $CDCl_3$ ):  $\delta$  = 144.17, 136.89,

136.59, 129.72, 129.28, 126.61, 125.33, 119.84, 73.65, 36.80, 27.48, 27.28, 23.33, 20.04 ppm.

HRMS (ESI) calcd for  $C_{14}H_{18}ONa$  ( $[M + Na]^+$ ): 225.1250; Found: 225.1249. HPLC (Chiracel

OD-H column, n-hexane/2-propanol = 90:10 (v/v), 1.0 mL/min, 254 nm, temp, r.t.),  $t_R$  = 5.87 min

(minor),  $t_S$  = 6.85 min (major).

**(S, E)-2-(2-methoxybenzylidene)cyclohexanol (5n, known compound) <sup>[1]</sup>**

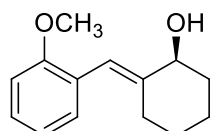

Colorless oil, 35 mg, 83% yield, 95% ee.  $[\alpha]^{20}_D$  -29.105 (*c* 0.400,  $CHCl_3$ ).

Purified by flash column chromatography (PE: EA = 10:1).  $^1H$  NMR (400

MHz,  $CDCl_3$ ):  $\delta$  = 7.29 (dt, *J* = 8.0 Hz, 1.6 Hz, 1H), 7.20 (d, *J* = 7.2 Hz, 1H),

6.96 (t, *J* = 7.6 Hz, 1H), 6.93 (d, *J* = 8.0 Hz, 1H), 6.55 (s, 1H), 4.33-4.30 (m, 1H), 3.86 (s, 3H),

2.70-2.64 (m, 1H), 2.16-2.10 (m, 1H), 2.07-2.01 (m, 1H), 1.94-1.88 (m, 1H), 1.81 (s, 1H),

1.71-1.50 (m, 4H) ppm;  $^{13}C$  NMR (100 MHz,  $CDCl_3$ ):  $\delta$  = 157.24, 144.34, 130.38, 127.86, 126.41,

120.07, 116.60, 110.40, 73.86, 55.41, 36.37, 27.42, 27.30, 23.23 ppm. HPLC (Chiracel OJ-H

column, n-hexane/2-propanol = 49:1 (v/v), 0.5 mL/min, 230 nm, temp, r.t.),  $t_R$  = 43.62 min

(major),  $t_S$  = 48.47 min (minor).

**(S, E)-2-(3-fluorobenzylidene)cyclohexanol (5o, unknown compound)**

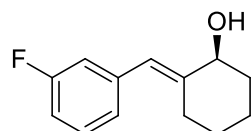

Yellow oil, 31 mg, 75% yield, 80% ee.  $[\alpha]^{20}_D$  -13.660 (*c* 0.400,  $CHCl_3$ ).

Purified by flash column chromatography (PE: EA = 8:1).  $^1H$  NMR (400

MHz, CDCl<sub>3</sub>):  $\delta$  = 7.34-7.29 (m, 1H), 7.04-7.01 (m, 1H), 6.97-6.93 (m, 2H), 6.54 (s, 1H), 4.29-4.26 (m, 1H), 2.80-2.74 (m, 1H), 2.15-2.04 (m, 2H), 1.93-1.89 (m, 1H), 1.73 (s, 1H), 1.64-1.48 (m, 4H) ppm; <sup>13</sup>C NMR (100 MHz, CDCl<sub>3</sub>):  $\delta$  = 162.69 (d,  $J_{C-F}$  = 243.7 Hz), 145.56, 140.00 (d,  $J_{C-F}$  = 7.6 Hz), 129.51 (d,  $J_{C-F}$  = 8.4 Hz), 124.68 (d,  $J_{C-F}$  = 2.9 Hz), 119.64 (d,  $J_{C-F}$  = 2.1 Hz), 115.65 (d,  $J_{C-F}$  = 21.0 Hz), 113.08 (d,  $J_{C-F}$  = 21.0 Hz), 73.60, 36.73, 27.34, 27.16, 23.32 ppm. HRMS (ESI) calcd for C<sub>13</sub>H<sub>15</sub>OFNa ([M + Na]<sup>+</sup>): 229.0999; Found: 229.1003. HPLC (Chiracel OD-H column, n-hexane/2-propanol = 90:10 (v/v), 1.0 mL/min, 254 nm, temp, r.t.),  $t_R$  = 5.61 min (minor),  $t_S$  = 6.32 min (major).

**(*S,E*)-2-(3-methylbenzylidene)cyclohexanol (5p, known compound)** <sup>[1]</sup>

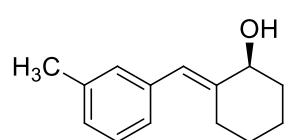

Colorless oil, 29 mg, 71% yield, 83% ee. [ $\alpha$ ]<sub>D</sub><sup>20</sup> -23.670 (*c* 1.142, CHCl<sub>3</sub>). Purified by flash column chromatography (PE: EA = 10:1). <sup>1</sup>H NMR (400 MHz, CDCl<sub>3</sub>):  $\delta$  = 7.26 (t,  $J$  = 8.0 Hz, 1H), 7.08-7.07 (m, 3H), 6.54 (s, 1H), 4.30-4.27 (m, 1H), 2.80-2.73 (m, 1H), 2.40 (s, 3H), 2.22-2.15 (m, 1H), 2.08-2.01 (m, 1H), 1.96-1.86 (m, 1H), 1.76 (s, 1H), 1.71-1.63 (m, 2H), 1.60-1.49 (m, 2H) ppm; <sup>13</sup>C NMR (100 MHz, CDCl<sub>3</sub>):  $\delta$  = 144.18, 137.66, 137.60, 129.68, 128.01, 127.04, 126.00, 120.97, 73.83, 36.54, 27.39, 27.03, 23.19, 21.50 ppm. HPLC (Chiracel OD-H column, n-hexane/2-propanol = 90:10 (v/v), 1.0 mL/min, 254 nm, temp, r.t.),  $t_R$  = 6.27 min (minor),  $t_S$  = 7.78 min (major).

**(*S,E*)-2-(3-methoxybenzylidene)cyclohexanol (5q, known compound)** <sup>[1]</sup>

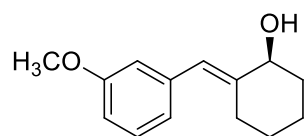

Colorless oil, 37 mg, 86% yield, 82% ee. [ $\alpha$ ]<sub>D</sub><sup>20</sup> -12.696 (*c* 0.972, CHCl<sub>3</sub>). Purified by flash column chromatography (PE: EA = 10:1). <sup>1</sup>H NMR (400 MHz, CDCl<sub>3</sub>):  $\delta$  = 7.27 (d,  $J$  = 8.4 Hz, 1H), 6.87-6.81 (m, 3H), 6.54 (s, 1H), 4.29-4.26 (m, 1H), 3.85 (s, 3H), 2.80-2.75 (m, 1H), 2.19-2.14 (m, 1H), 2.07-2.03 (m, 1H), 1.92-1.88 (m, 1H), 1.81 (s, 1H), 1.70-1.63 (m, 2H), 1.58-1.49 (m, 2H) ppm; <sup>13</sup>C NMR (100 MHz, CDCl<sub>3</sub>):  $\delta$  = 159.39, 144.67, 139.14, 129.08, 121.48, 120.66, 114.57, 111.73, 73.74, 55.19, 36.62, 27.39, 27.17, 23.27 ppm. HPLC (Chiracel OD-H column, n-hexane/2-propanol = 90:10 (v/v), 1.0 mL/min, 254 nm, temp, r.t.),  $t_R$  = 10.10 min (minor),  $t_S$  = 14.06 min (major).

**(*S,E*)-2-(4-chlorobenzylidene)cyclohexanol (5r, known compound)** <sup>[1]</sup>

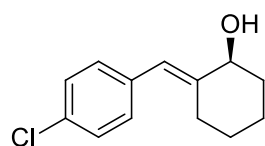

White solid, 36 mg, 81% yield, 74% ee. mp 80–82 °C.  $[\alpha]_{D}^{20}$  -19.520 (*c* 0.340, CHCl<sub>3</sub>). Purified by flash column chromatography (PE: EA = 8:1). <sup>1</sup>H NMR (400 MHz, CDCl<sub>3</sub>):  $\delta$  = 7.32 (d, *J* = 8.4 Hz, 2H), 7.16 (d, *J* = 8.4 Hz, 2H), 6.51 (s, 1H), 4.27–4.24 (m, 1H), 2.75–2.70 (m, 1H), 2.13–2.03 (m, 3H), 1.89 (s, 1H), 1.68–1.57 (m, 3H), 1.51–1.44 (m, 1H) ppm; <sup>13</sup>C NMR (100 MHz, CDCl<sub>3</sub>):  $\delta$  = 145.16, 136.15, 131.95, 130.27, 130.25, 128.36, 128.27, 119.57, 73.62, 36.68, 27.34, 27.11, 23.32 ppm. HPLC (Chiracel OD-H column, n-hexane/2-propanol = 99:1 (v/v), 1.0 mL/min, 254 nm, temp, r.t.), *t*<sub>R</sub> = 28.36 min (major), *t*<sub>S</sub> = 31.96 min (minor).

**(*S,E*)-2-(4-(trifluoromethyl)benzylidene)cyclohexanol (5s, unknown compound)**

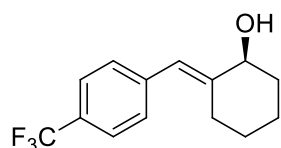

White solid, 44 mg, 85% yield, 71% ee. mp 66–68 °C.  $[\alpha]_{D}^{20}$  -2.053 (*c* 1.000, CHCl<sub>3</sub>). Purified by flash column chromatography (PE: EA = 8:1). <sup>1</sup>H NMR (400 MHz, CDCl<sub>3</sub>):  $\delta$  = 7.61 (d, *J* = 8.0 Hz, 2H), 7.35 (d, *J* = 8.0 Hz, 2H), 6.60 (s, 1H), 4.30–4.29 (m, 1H), 2.79–2.73 (m, 1H), 2.12–2.07 (m, 2H), 1.94–1.91 (m, 1H), 1.70–1.66 (m, 3H), 1.59–1.47 (m, 2H) ppm; <sup>13</sup>C NMR (100 MHz, CDCl<sub>3</sub>):  $\delta$  = 146.47, 144.77, 141.49, 129.19 (d, *J*<sub>C-F</sub> = 3.3 Hz), 125.15 (m), 122.31, 119.40, 73.55, 36.84, 27.37, 27.27, 23.40 ppm. HRMS (ESI) calcd for C<sub>14</sub>H<sub>15</sub>OF<sub>3</sub>Na ([M + Na]<sup>+</sup>): 279.0967; Found: 279.0969. HPLC (Chiracel OJ-H column, n-hexane/2-propanol = 99:1 (v/v), 1.0 mL/min, 230 nm, temp, r.t.), *t*<sub>R</sub> = 19.33 min (minor), *t*<sub>S</sub> = 27.64 min (major).

**(*S,E*)-2-(4-methylbenzylidene)cyclohexanol (5t, known compound)** <sup>[1]</sup>

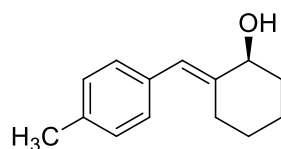

White solid, 34 mg, 84% yield, 89% ee. mp 48–50 °C.  $[\alpha]_{D}^{20}$  -25.877 (*c* 0.838, CHCl<sub>3</sub>). Purified by flash column chromatography (PE: EA = 10:1). <sup>1</sup>H NMR (400 MHz, CDCl<sub>3</sub>):  $\delta$  = 7.20–7.15 (m, 4H), 6.53 (s, 1H), 4.30–4.27 (m, 1H), 2.79–2.73 (m, 1H), 2.39 (s, 3H), 2.22–2.15 (m, 1H), 2.06–2.00 (m, 1H), 1.96–1.87 (m, 1H), 1.78 (s, 1H), 1.70–1.62 (m, 2H), 1.59–1.49 (m, 2H) ppm; <sup>13</sup>C NMR (100 MHz, CDCl<sub>3</sub>):  $\delta$  = 143.77, 135.91, 134.70, 128.86, 128.84, 120.81, 73.85, 36.50, 27.37, 26.97, 23.17, 21.20 ppm. HPLC (Chiracel OD-H column, n-hexane/2-propanol = 99:1 (v/v), 1.0 mL/min, 254 nm, temp, r.t.), *t*<sub>S</sub> = 38.65 min (major), *t*<sub>R</sub> = 43.89 min (minor).

**(*S,E*)-2-(4-(tert-butyl)benzylidene)cyclohexanol (5u, unknown compound)**

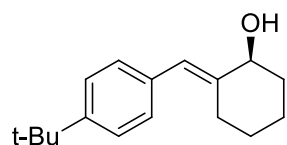

Colorless oil, 44 mg, 90% yield, 93% ee.  $[\alpha]_D^{20}$  -21.622 (*c* 0.302, CHCl<sub>3</sub>). Purified by flash column chromatography (PE: EA = 8:1). **<sup>1</sup>H NMR** (400 MHz, CDCl<sub>3</sub>):  $\delta$  = 7.41 (d, *J* = 8.0 Hz, 2H), 7.23 (d, *J* = 8.0 Hz, 2H), 6.55 (s, 1H), 4.30-4.28 (m, 1H), 2.83-2.77 (m, 1H), 2.25-2.19 (m, 1H), 2.07-2.02 (m, 1H), 1.97-1.87 (m, 2H), 1.73-1.52 (m, 4H), 1.39 (s, 9H) ppm; **<sup>13</sup>C NMR** (100 MHz, CDCl<sub>3</sub>):  $\delta$  = 149.16, 143.81, 134.69, 128.65, 125.03, 120.74, 73.89, 36.50, 34.51, 31.37, 27.37, 26.98, 23.14 ppm. HRMS (ESI) calcd for C<sub>17</sub>H<sub>24</sub>ONa ([M + Na]<sup>+</sup>): 267.1719; Found: 267.1718. HPLC (Chiracel OD-H column, n-hexane/2-propanol = 99:1 (v/v), 1.0 mL/min, 254 nm, temp, r.t.), *t*<sub>S</sub> = 27.35 min (major), *t*<sub>R</sub> = 29.74 min (minor).

**(*S,E*)-2-(naphthalen-1-ylmethylene)cyclohexanol (5v, known compound) <sup>[1]</sup>**

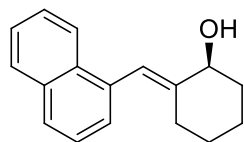

Colorless oil, 40 mg, 84% yield, 83% ee.  $[\alpha]_D^{20}$  -5.500 (*c* 1.000, CHCl<sub>3</sub>). Purified by flash column chromatography (PE: EA = 7:1). **<sup>1</sup>H NMR** (400 MHz, CDCl<sub>3</sub>):  $\delta$  = 8.06-8.03 (m, 1H), 7.91-7.89 (m, 1H), 7.81 (d, *J* = 8.0 Hz, 1H), 7.54-7.47 (m, 3H), 7.32 (d, *J* = 6.8 Hz, 1H), 6.96 (s, 1H), 4.45-4.41 (m, 1H), 2.63-2.54 (m, 1H), 2.18-2.13 (m, 1H), 2.04-1.90 (m, 2H), 1.83 (s, 1H), 1.78-1.70 (m, 1H), 1.63-1.56 (m, 2H), 1.49-1.43 (m, 1H) ppm; **<sup>13</sup>C NMR** (100 MHz, CDCl<sub>3</sub>):  $\delta$  = 145.96, 135.03, 133.55, 132.29, 128.32, 126.97, 126.47, 125.73, 125.70, 125.32, 125.26, 118.59, 73.71, 36.98, 27.78, 27.52, 23.47 ppm. HPLC (Chiracel OD-H column, n-hexane/2-propanol = 90:10 (v/v), 1.0 mL/min, 230 nm, temp, r.t.), *t*<sub>R</sub> = 10.02 min (minor), *t*<sub>S</sub> = 14.01 min (major).

**(*S,E*)-2-(naphthalen-2-ylmethylene)cyclohexanol (5w, known compound) <sup>[1]</sup>**

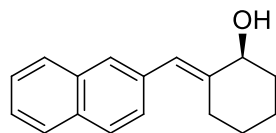

Colorless oil, 40 mg, 85% yield, 83% ee.  $[\alpha]_D^{20}$  -17.470 (*c* 0.400, CHCl<sub>3</sub>). Purified by flash column chromatography (PE: EA = 10:1). **<sup>1</sup>H NMR** (400 MHz, CDCl<sub>3</sub>):  $\delta$  = 7.87-7.83 (m, 3H), 7.70 (s, 1H), 7.52-7.46 (m, 2H), 7.42-7.39 (m, 1H), 6.72 (s, 1H), 4.36-4.33 (m, 1H), 2.88-2.82 (m, 1H), 2.27-2.20 (m, 1H), 2.11-2.06 (m, 1H), 1.96-1.91 (m, 1H), 1.75-1.69 (m, 3H), 1.58-1.50 (m, 2H) ppm; **<sup>13</sup>C NMR** (100 MHz, CDCl<sub>3</sub>):  $\delta$  = 144.87, 135.21, 133.36, 132.05, 127.79, 127.58, 127.39, 126.02, 125.57, 120.87, 73.85, 36.65, 27.41, 27.18, 23.26 ppm. HPLC (Chiracel OD-H column,

n-hexane/ 2-propanol = 90:10 (v/v), 1.0 mL/min, 254 nm, temp, r.t.),  $t_R$  = 8.42 min (major),  $t_R$  = 9.91 min (minor).

**(*S, E*)-2-benzylidenecycloheptanol (5x, known compound)** <sup>[1]</sup>

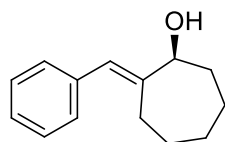

Colorless oil, 35 mg, 86% yield, 85% ee.  $[\alpha]_D^{20}$  70.218 (*c* 0.300, CHCl<sub>3</sub>). Purified by flash column chromatography (PE: EA = 10:1). <sup>1</sup>H NMR (400 MHz, CDCl<sub>3</sub>):  $\delta$  = 7.40-7.32 (m, 4H), 7.29-7.25 (m, 1H), 6.62 (s, 1H), 4.45-4.41 (m, 1H), 2.52-2.49 (m, 2H), 2.20-2.13 (m, 1H), 1.90-1.86 (m, 1H), 1.82-1.73 (m, 3H), 1.69-1.40 (m, 4H) ppm; <sup>13</sup>C NMR (100 MHz, CDCl<sub>3</sub>):  $\delta$  = 146.43, 137.62, 128.70, 128.22, 126.87, 126.51, 77.09, 36.66, 29.19, 28.13, 26.61, 23.92 ppm. HPLC (Chiracel OD-H column, n-hexane/2-propanol = 90:10 (v/v), 1.0 mL/min, 254 nm, temp, r.t.),  $t_R$  = 6.03 min (minor),  $t_S$  = 7.20 min (major).

**(*S, E*)-2-(2-fluorobenzylidene)cycloheptanol (5y, unknown compound)**

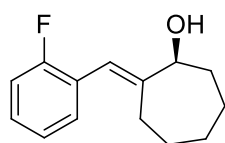

Yellow oil, 38 mg, 86% yield, 90% ee.  $[\alpha]_D^{20}$  5.800 (*c* 1.000, CHCl<sub>3</sub>). Purified by flash column chromatography (PE: EA = 8 :1). <sup>1</sup>H NMR (400 MHz, CDCl<sub>3</sub>):  $\delta$  = 7.33-7.23 (m, 2H), 7.16-7.06 (m, 2H), 6.63 (s, 1H), 4.49-4.46 (m, 1H), 2.44-2.40 (m, 2H), 2.18-2.11 (m, 1H), 1.80-1.70 (m, 5H), 1.54-1.40 (m, 3H) ppm; <sup>13</sup>C NMR (100 MHz, CDCl<sub>3</sub>):  $\delta$  = 160.21 (d,  $J_{C-F}$  = 244.9 Hz), 148.85, 130.27 (d,  $J_{C-F}$  = 3.4 Hz), 128.28 (d,  $J_{C-F}$  = 8.2 Hz), 125.41 (d,  $J_{C-F}$  = 14.6 Hz), 123.61 (d,  $J_{C-F}$  = 3.7 Hz), 119.10 (d,  $J_{C-F}$  = 3.3 Hz), 115.34 (d,  $J_{C-F}$  = 22.3 Hz), 76.54, 36.67, 28.88, 27.84, 26.97, 24.05 ppm. HRMS (ESI) calcd for C<sub>14</sub>H<sub>17</sub>OFNa ([M + Na]<sup>+</sup>): 243.1156; Found: 243.1159. HPLC (Chiracel OD-H column, n-hexane/2-propanol = 90:10 (v/v), 1.0 mL/min, 254 nm, temp, r.t.),  $t_R$  = 5.10 min (minor),  $t_S$  = 5.66 min (major).

**(*S, E*)-2-(3-methylbenzylidene)cycloheptanol (5z, unknown compound)**

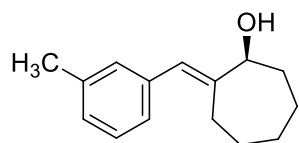

Yellow oil, 34 mg, 79% yield, 86% ee.  $[\alpha]_D^{20}$  28.206 (*c* 0.420, CHCl<sub>3</sub>). Purified by flash column chromatography (PE: EA = 8:1). <sup>1</sup>H NMR (400 MHz, CDCl<sub>3</sub>):  $\delta$  = 7.29-7.25 (m, 1H), 7.15-7.08 (m, 3H), 6.59 (s, 1H), 4.44-4.41 (m, 1H), 2.54-2.47 (m, 2H), 2.40 (s, 3H), 2.19-2.12 (m, 1H), 1.92-1.85 (m, 1H), 1.80-1.70 (m, 3H), 1.61-1.37 (m, 4H) ppm; <sup>13</sup>C NMR (100 MHz, CDCl<sub>3</sub>):  $\delta$  = 146.27, 137.71,

137.58, 129.51, 128.09, 127.27, 126.96, 125.66, 77.11, 36.66, 29.18, 28.14, 26.63, 23.92, 21.52 ppm. HRMS (ESI) calcd for C<sub>15</sub>H<sub>20</sub>ONa ([M + Na]<sup>+</sup>): 239.1406; Found: 239.1408. HPLC (Chiracel OD-H column, n-hexane/2-propanol = 90:10 (v/v), 1.0 mL/min, 254 nm, temp, r.t.), t<sub>R</sub> = 5.44 min (minor), t<sub>S</sub> = 6.91 min (major).

**(S, E)-2-(4-methylbenzylidene)cycloheptanol (5a', unknown compound)**

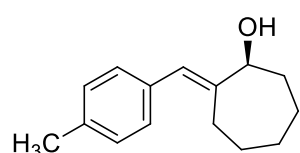

Colorless oil, 38 mg, 87% yield, 84% ee. [ $\alpha$ ]<sub>D</sub><sup>20</sup> 12.576 (*c* 1.000, CHCl<sub>3</sub>). Purified by flash column chromatography (PE: EA = 10:1). <sup>1</sup>H NMR (400 MHz, CDCl<sub>3</sub>):  $\delta$  = 7.24 (d, *J* = 8.0 Hz, 2H), 7.19 (d, *J* = 8.0 Hz, 2H), 6.58 (s, 1H), 4.44-4.40 (m, 1H), 2.56-2.45 (m, 2H), 2.39 (s, 3H), 2.19-2.12 (m, 1H), 1.93-1.85 (m, 1H), 1.81-1.70 (m, 3H), 1.66-1.39 (m, 4H) ppm; <sup>13</sup>C NMR (100 MHz, CDCl<sub>3</sub>):  $\delta$  = 145.70, 136.21, 134.69, 128.94, 128.61, 126.85, 77.21, 36.61, 29.28, 28.16, 26.59, 23.90, 21.19 ppm. HRMS (ESI) calcd for C<sub>15</sub>H<sub>20</sub>ONa ([M + Na]<sup>+</sup>): 239.1406; Found: 239.1404. HPLC (Chiracel OD-H column, n-hexane/2-propanol = 95:5 (v/v), 1.0 mL/min, 254 nm, temp, r.t.), t<sub>R</sub> = 8.42 min (minor), t<sub>S</sub> = 9.01 min (major).

**(1S, 2S, E)-ethyl 3-(2-bromobenzylidene)-2-hydroxycyclopentanecarboxylate (7, known compound) <sup>[2]</sup>**

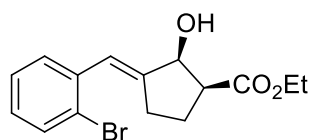

Pale yellow solid, 1.23 g, 76% yield, 94% ee. [ $\alpha$ ]<sub>D</sub><sup>20</sup> 5.800 (*c* 1.000, CHCl<sub>3</sub>). mp 54-55 °C. Purified by flash column chromatography (PE: EA = 5:2). <sup>1</sup>H NMR (400 MHz, CDCl<sub>3</sub>):  $\delta$  = 7.62 (dd, *J* = 8.0 Hz, 1.2 Hz, 1H), 7.44 (dd, *J* = 8.0 Hz, 1.2 Hz, 1H), 7.33 (dt, *J* = 7.6 Hz, 0.8 Hz, 1H), 7.12 (dt, *J* = 7.6 Hz, 1.6 Hz, 1H), 6.88 (s, 1H), 4.82-4.78 (m, 1H), 4.25 (q, *J* = 7.2 Hz, 2H), 3.15 (d, *J* = 5.6 Hz, 1H), 2.99-2.94 (m, 1H), 2.85-2.78 (m, 1H), 2.53-2.44 (m, 1H), 2.33-2.24 (m, 1H), 2.13-2.04 (m, 1H), 1.33 (t, *J* = 7.2 Hz, 3H) ppm; <sup>13</sup>C NMR (100 MHz, CDCl<sub>3</sub>):  $\delta$  = 173.74, 146.62, 136.98, 132.78, 129.56, 128.37, 127.04, 124.40, 124.31, 76.92, 60.86, 48.19, 27.32, 25.70, 14.27 ppm. HPLC (Chiracel AD-H column, n-hexane/2-propanol = 90:10 (v/v), 1.0 mL/min, 254 nm, temp, r.t.), t<sub>S</sub> = 9.55 min (major), t<sub>R</sub> = 10.75 min (minor).

**Reference:**

- [1] Xie, J. B.; Xie, J. H.; Liu, X. Y.; Kong, W. L.; Li, S.; Zhou, Q. L.; *J. Am. Chem. Soc.* **2010**, *132*, 4538–4539.
- [2] Bin, H. Y.; Wang, K.; Yang, D.; Yang, X. H.; Xie, J. H.; *Angew. Chem. Int. Ed.*, **2019**, *58*, 1174–1177.
- [3] Li, J.; Zhu, Y.; Lu, Y.; Wang, Y.; Liu, Y.; Liu, D.; Zhang, W. *Organometallics* **2019**, *38*, 3970–3978.
- [4] Li, J.; Lu, Y.; Zhu, Y.; Nie, Y.; Shen, J.; Liu, Y.; Liu, D.; Zhang, W. *Org. Lett.* **2019**, *21*, 4331-4335.

## 8. <sup>1</sup>H NMR & <sup>13</sup>C NMR Spectra of the Products

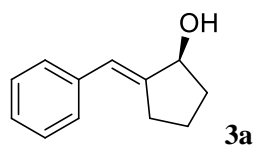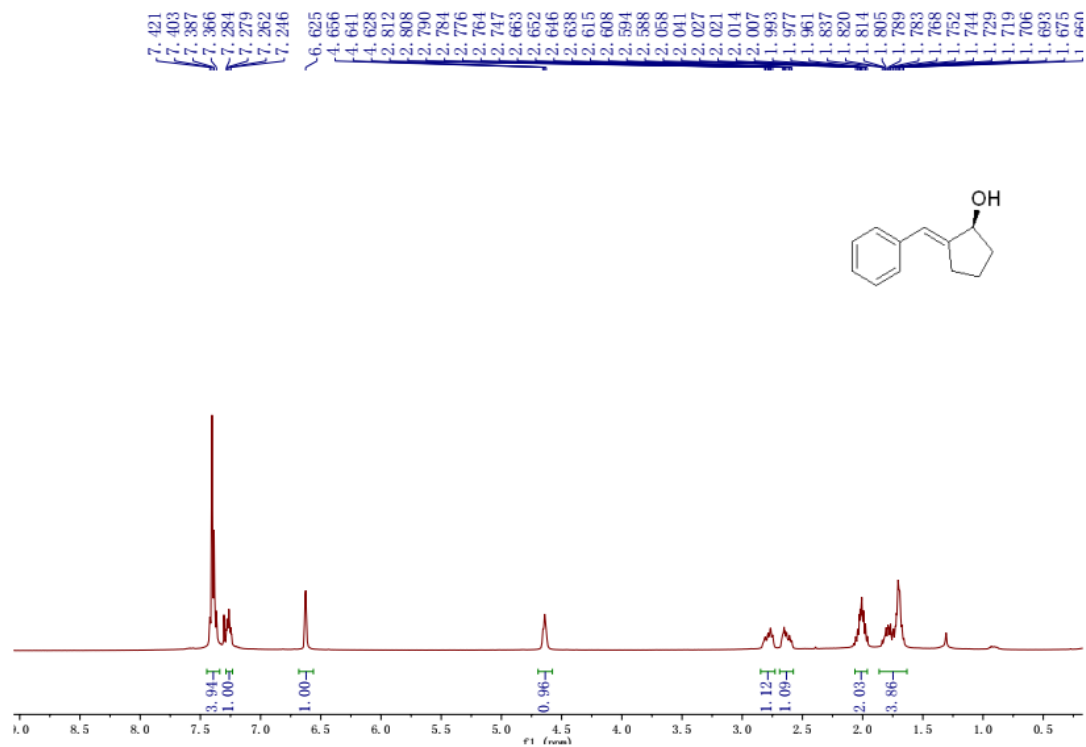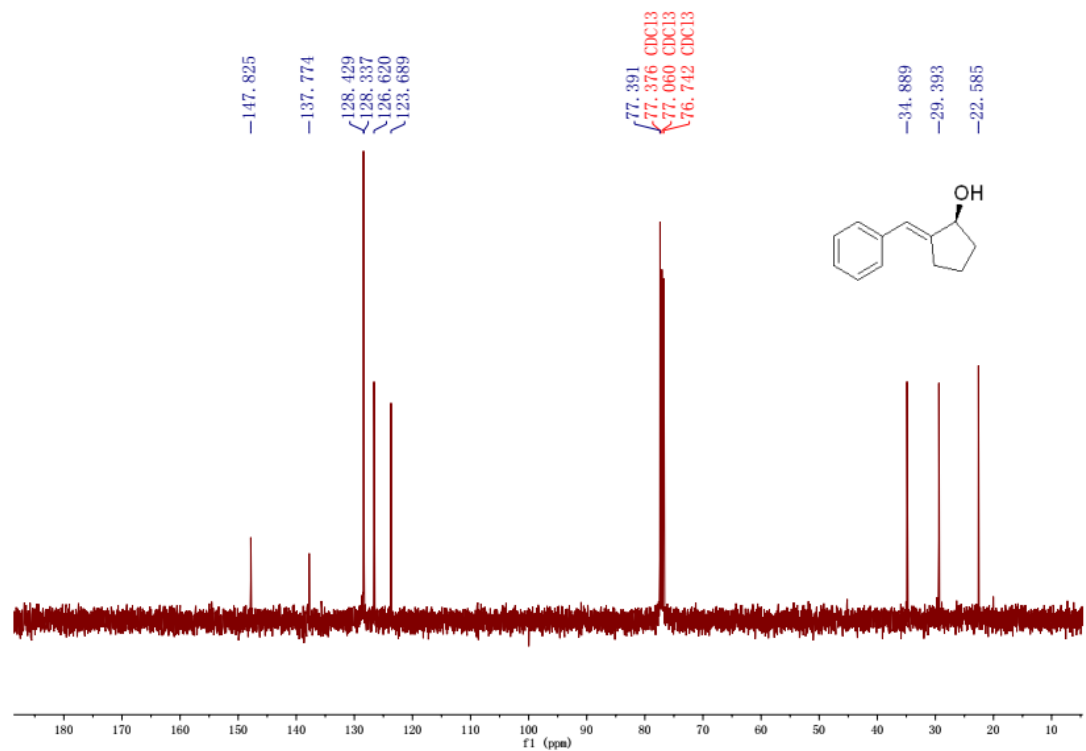



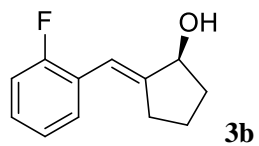

7.482  
 7.462  
 7.443  
 7.261  
 7.250  
 7.231  
 7.212  
 7.169  
 7.152  
 7.133  
 7.110  
 7.081  
 7.060  
 6.780

4.674  
 4.661  
 4.649

2.756  
 2.738  
 2.729  
 2.714  
 2.693  
 2.679  
 2.588  
 2.583  
 2.568  
 2.561  
 2.533  
 2.518

2.034  
 2.027  
 2.019  
 2.005  
 1.999  
 1.984  
 1.786  
 1.769  
 1.765  
 1.743  
 1.730  
 1.718

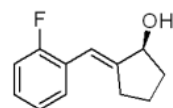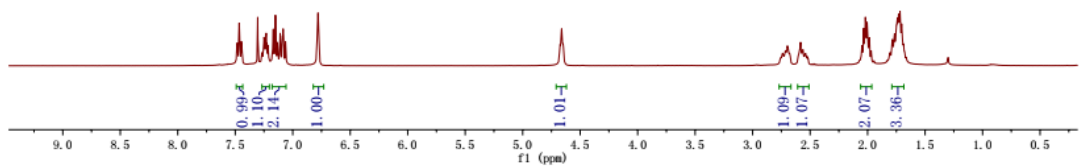

-161.413  
 -158.946  
 -150.037  
 129.149  
 129.117  
 128.224  
 128.141  
 125.607  
 125.480  
 123.697  
 123.661  
 115.451  
 115.354  
 115.301  
 115.229

77.363 CDCl3  
 77.088  
 77.045 CDCl3  
 76.727 CDCl3

-34.837  
 -29.171  
 -22.390

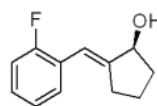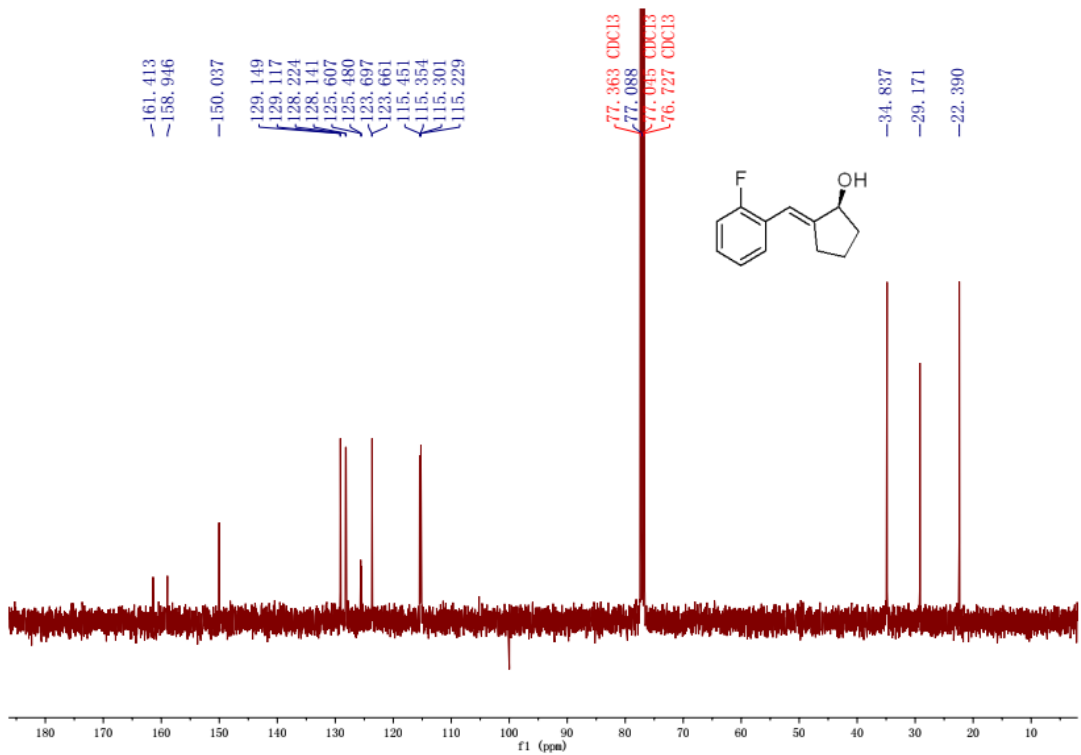

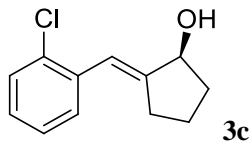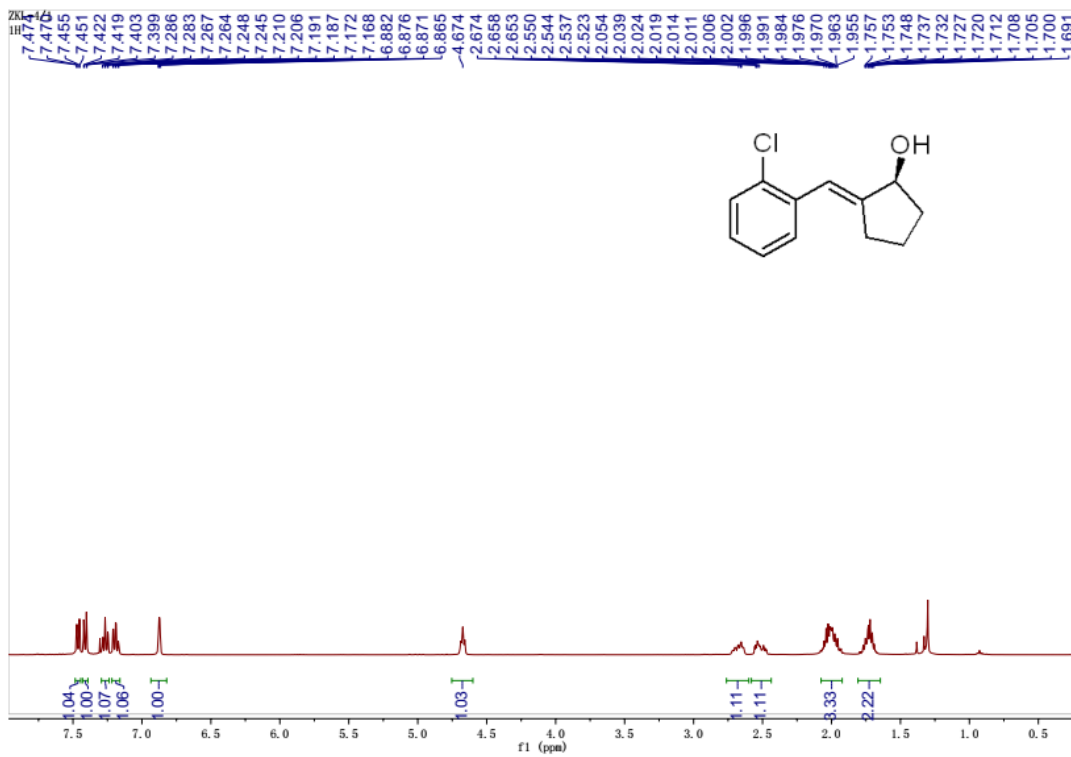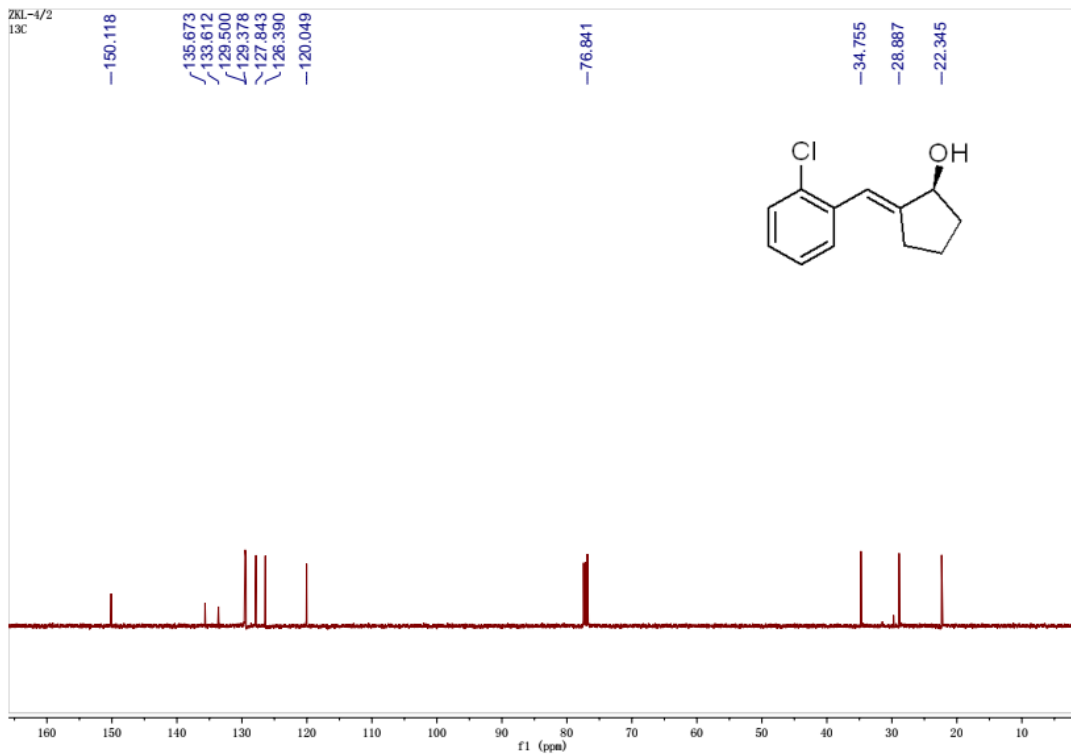

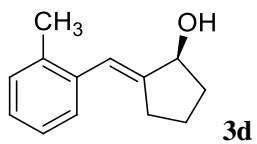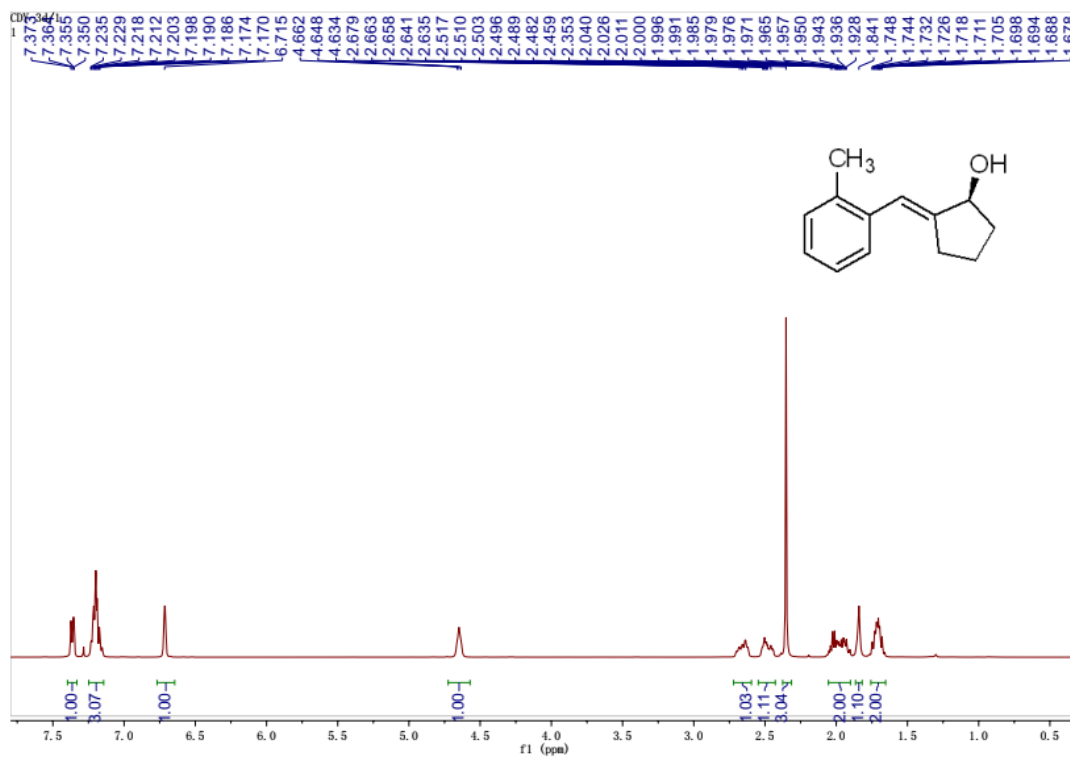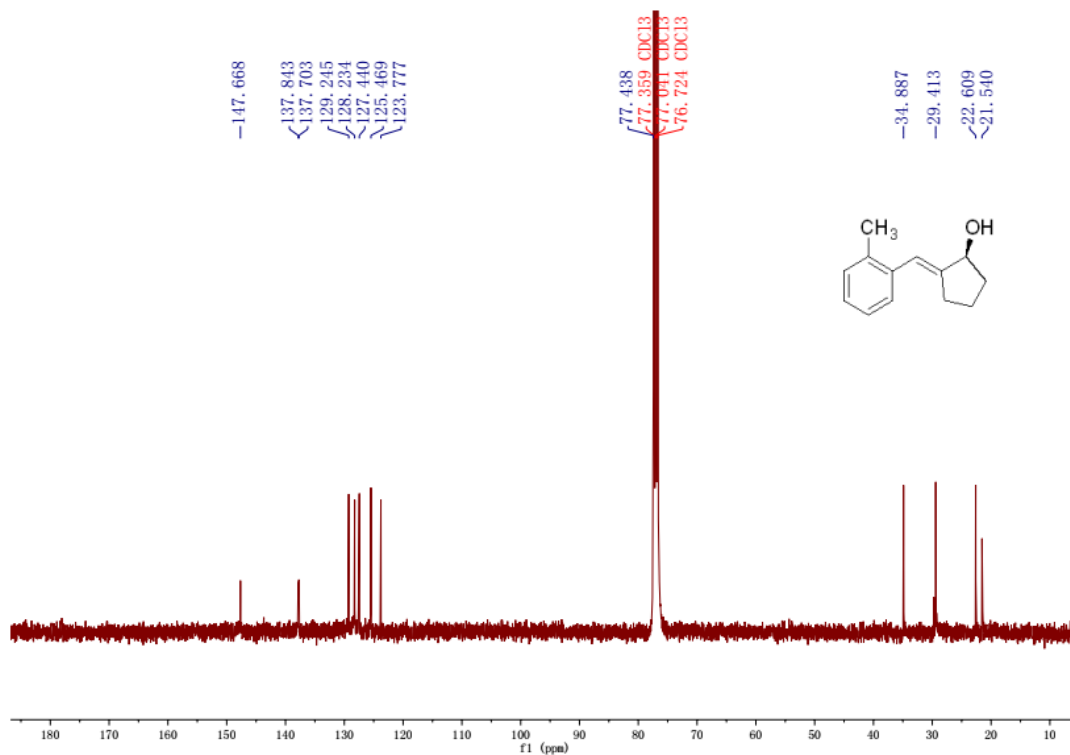

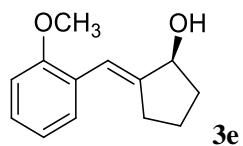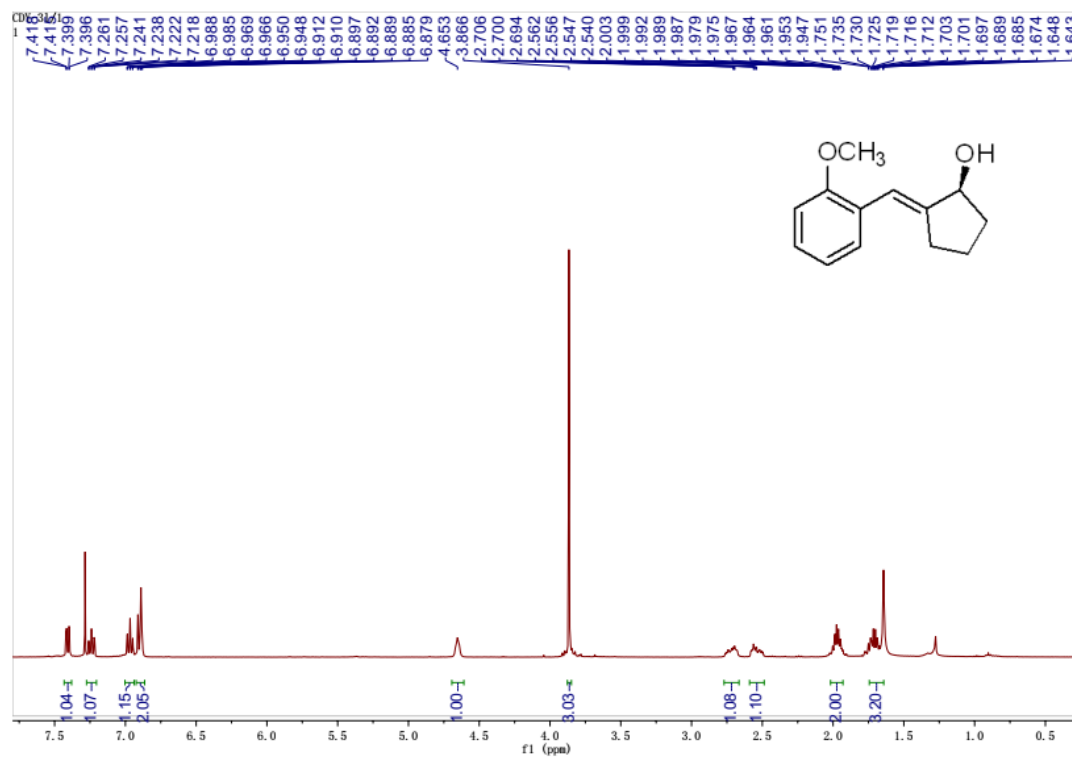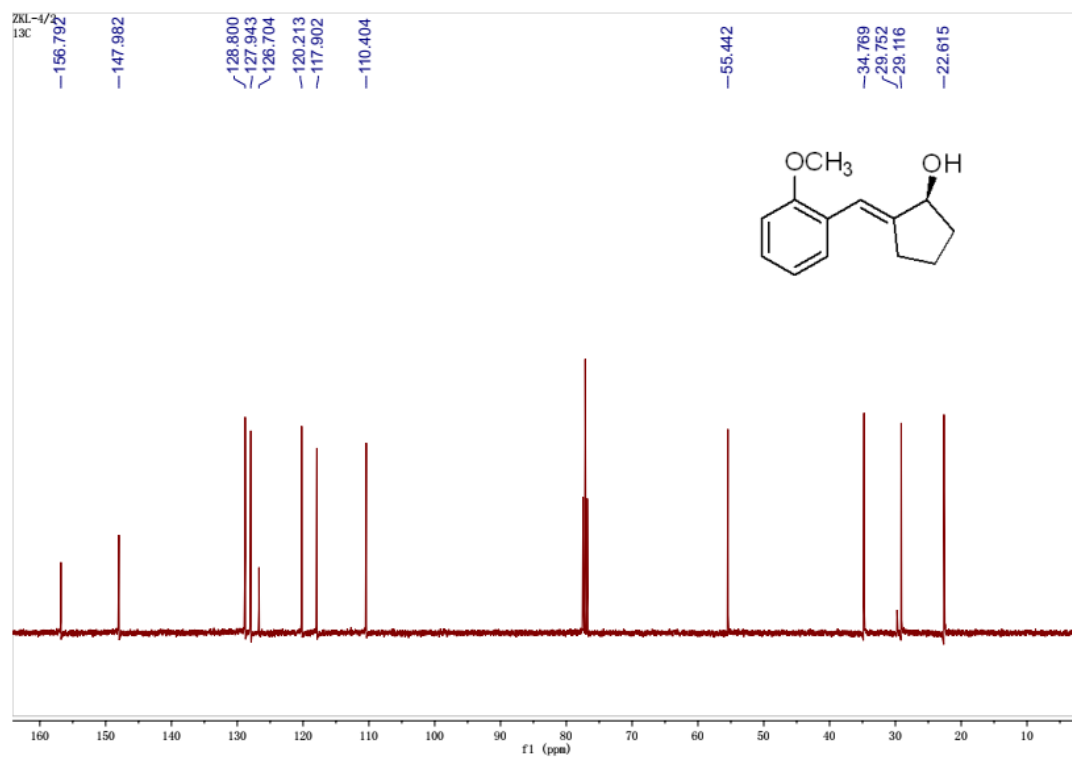

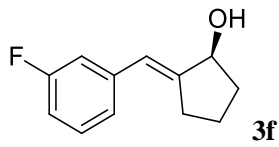

7.35  
7.33  
7.32  
7.31  
7.30  
7.30  
7.16  
7.14  
7.11  
7.09  
6.97  
6.95  
6.94  
6.93  
6.58

4.62  
2.77  
2.75  
2.75  
2.74  
2.73  
2.73  
2.72  
2.71  
2.71  
2.64  
2.63  
2.62  
2.61  
2.04  
2.02  
2.02  
2.01  
2.00  
1.99  
1.99  
1.78  
1.77  
1.76  
1.76  
1.69  
1.67

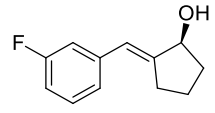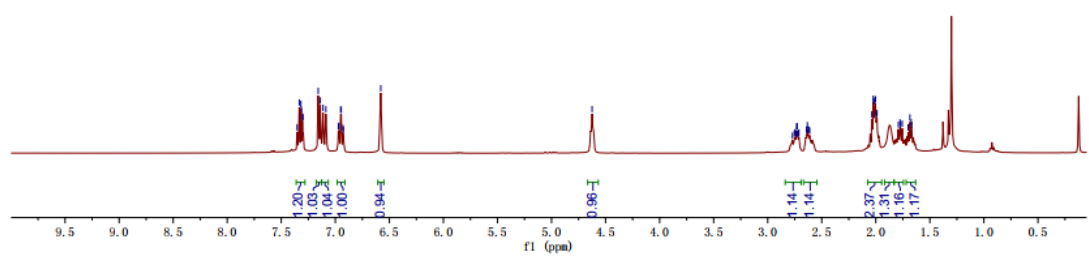

164.06  
161.63  
149.18  
140.07  
139.99  
129.73  
129.64  
124.32  
124.29  
122.60  
122.58  
114.91  
113.69  
113.27

77.24  
34.84  
29.39  
22.39

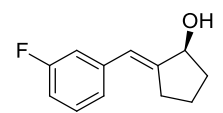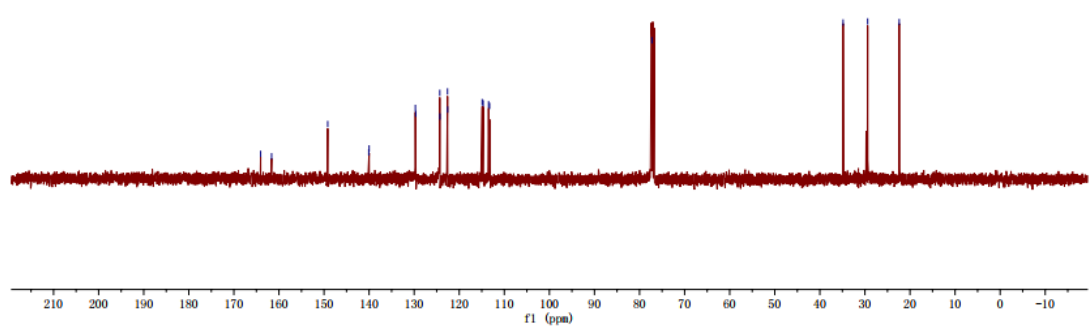

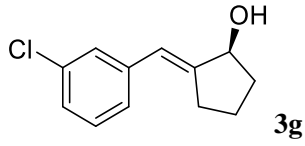

7.390  
7.386  
7.381  
7.328  
7.309  
7.305  
7.290  
7.276  
7.258  
7.252  
7.241  
7.236  
7.232  
7.223  
7.218  
7.213  
6.567  
6.556

4.640  
4.624

2.787  
2.765  
2.761  
2.743  
2.724  
2.698  
2.641  
2.627  
2.621  
2.586  
2.444  
2.031  
2.027  
2.023  
2.019  
2.014  
2.002  
1.987  
1.806  
1.786  
1.768  
1.705  
1.680  
1.299

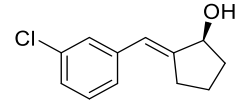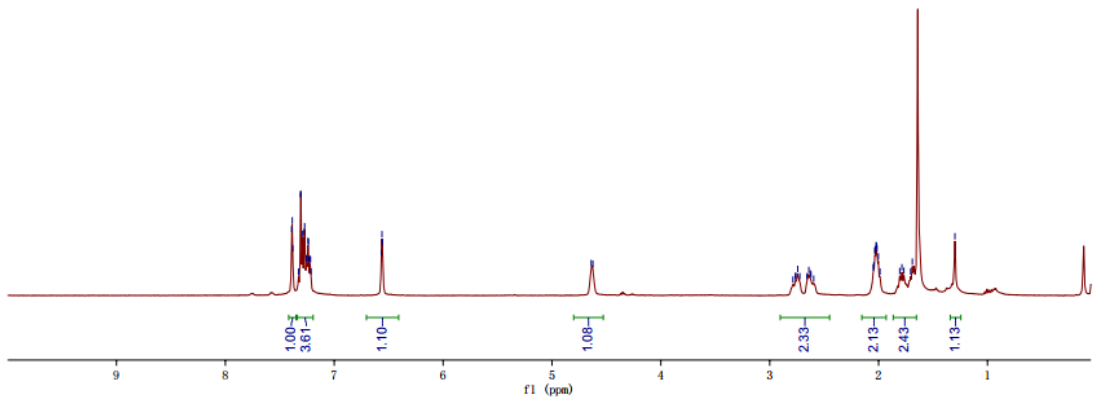

149.385  
138.588  
134.215  
129.522  
128.202  
126.595  
126.574  
122.366

77.261

34.889  
29.380  
22.390

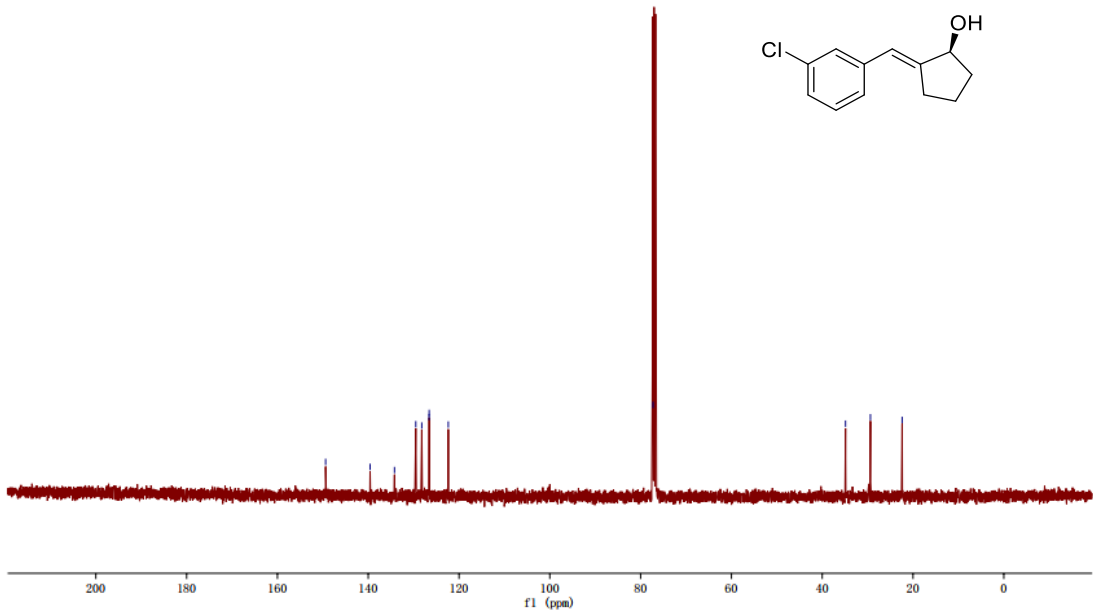

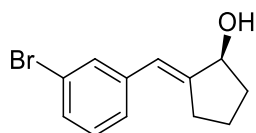

**3h**

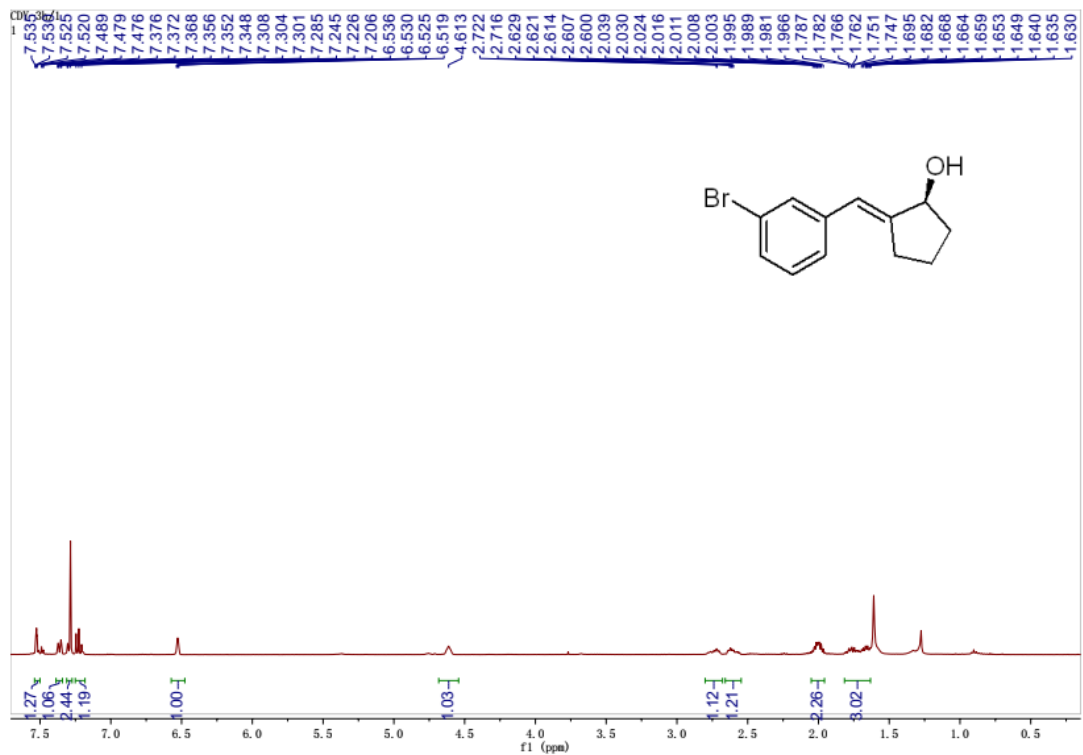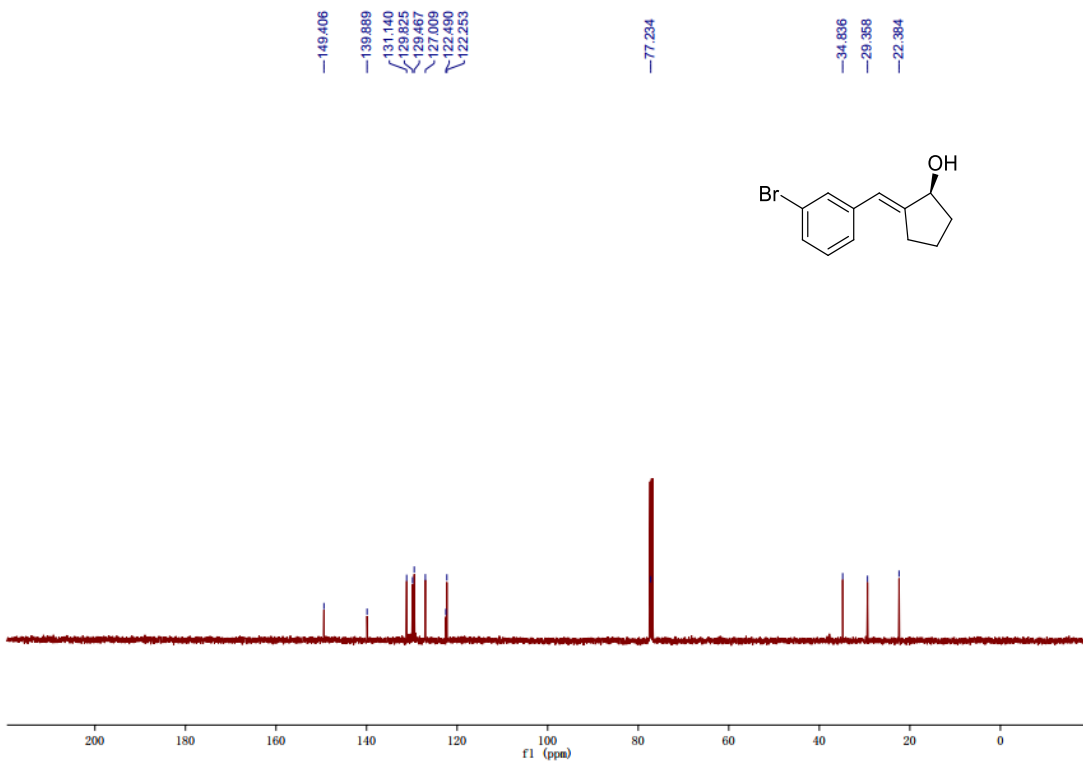

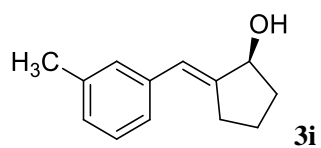

7.376  
 7.359  
 7.355  
 7.234  
 7.222  
 7.204  
 7.192  
 7.177  
 7.166  
 6.720

4.662  
 4.655  
 2.710  
 2.704  
 2.688  
 2.666  
 2.644  
 2.628  
 2.531  
 2.524  
 2.511  
 2.497  
 2.481  
 2.468  
 2.454  
 2.447  
 2.359  
 2.052  
 2.039  
 2.024  
 2.010  
 1.997  
 1.988  
 1.975  
 1.959  
 1.953  
 1.938  
 1.923  
 1.763  
 1.747  
 1.732  
 1.716  
 1.701  
 1.687

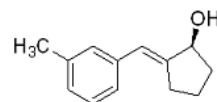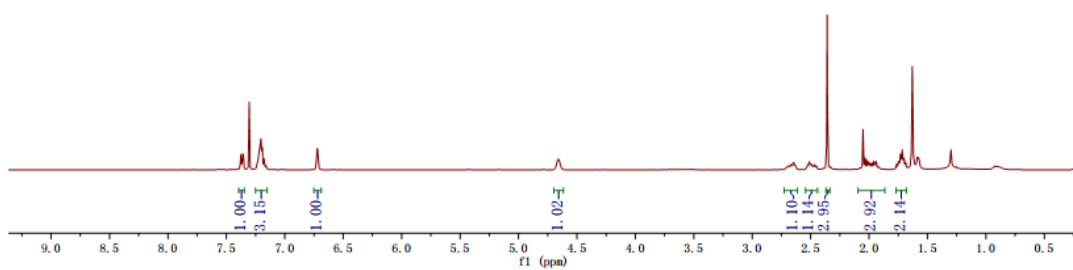

148.256  
 136.594  
 136.204  
 130.007  
 128.012  
 126.788  
 125.563  
 121.652

77.357 CDCl3  
 77.039 CDCl3  
 76.856  
 76.721 CDCl3

35.029  
 28.806  
 22.428  
 20.037

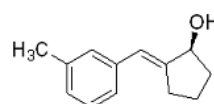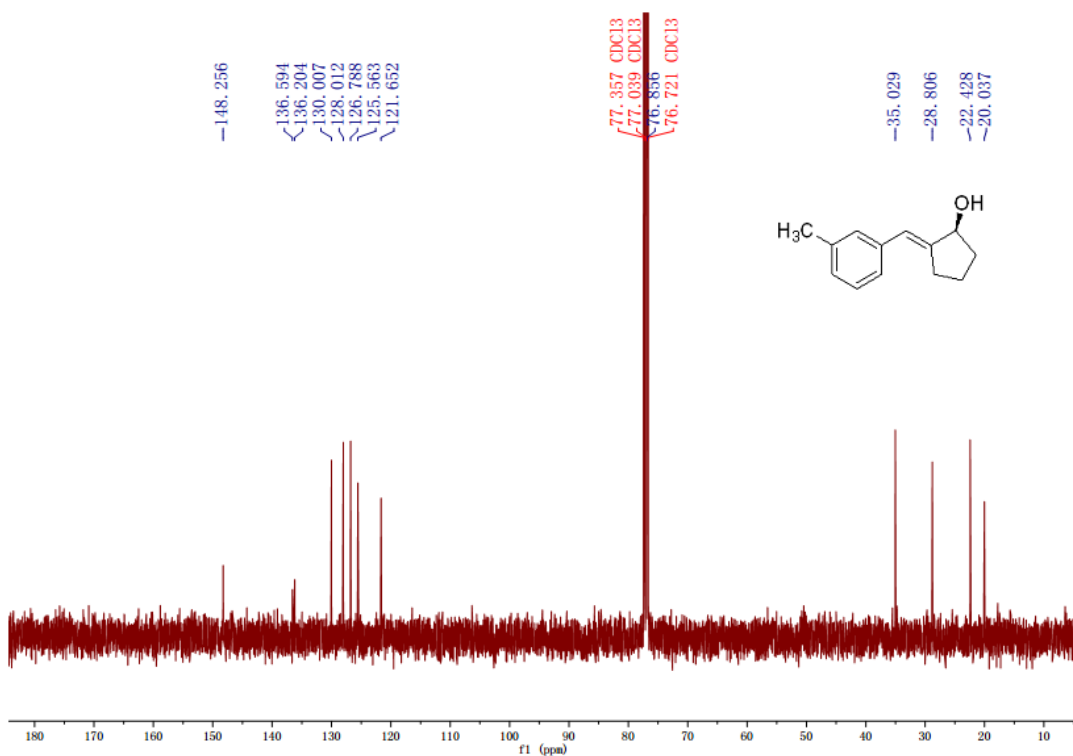



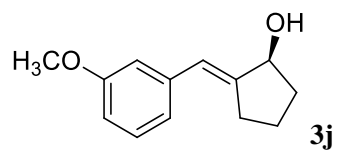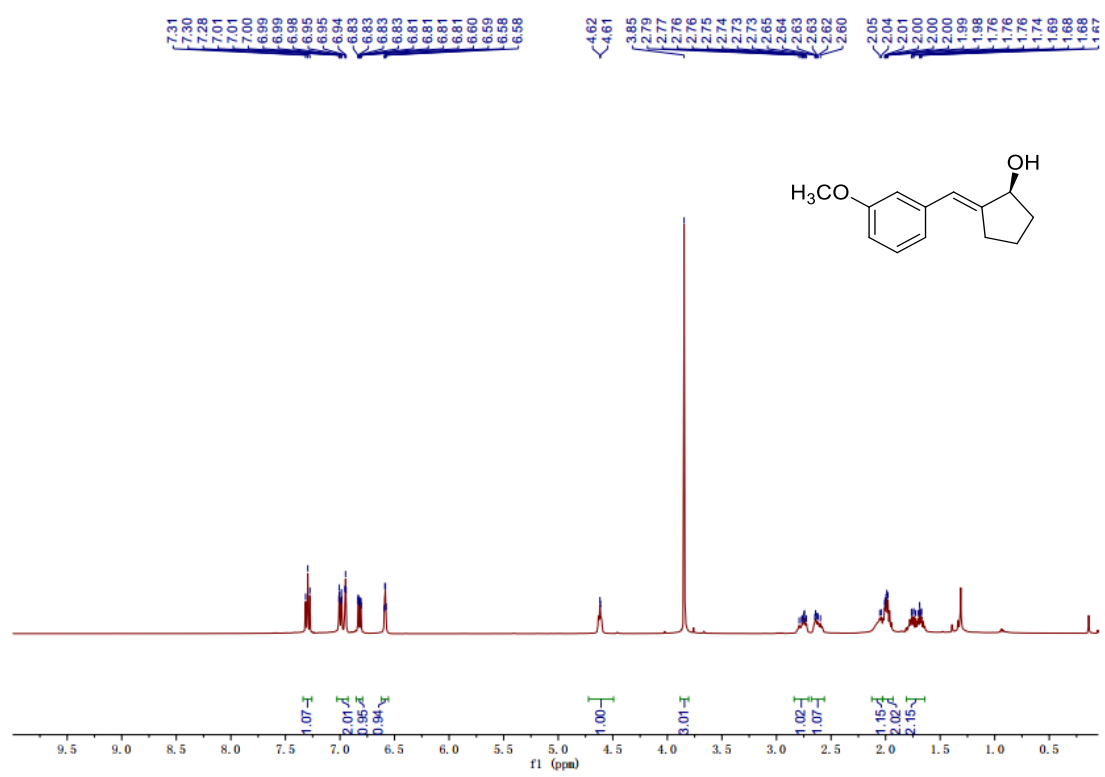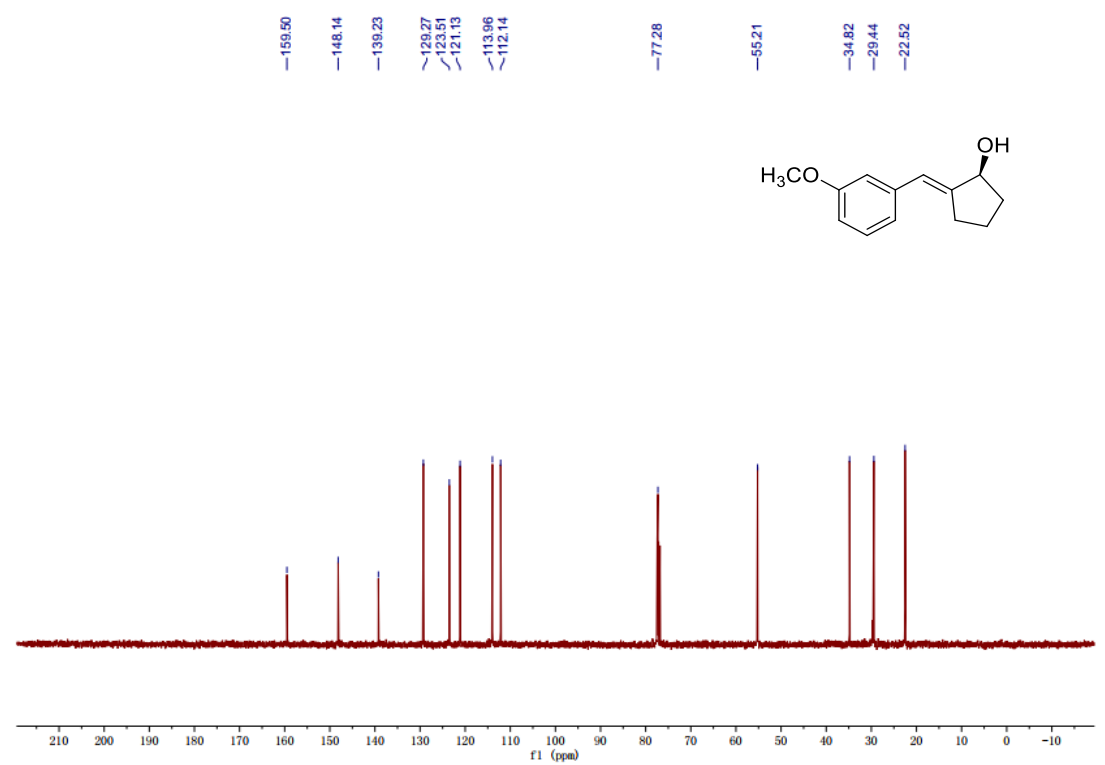

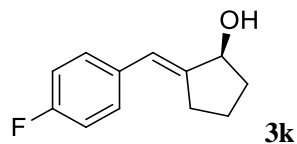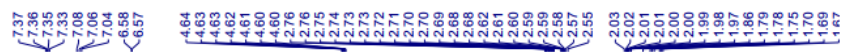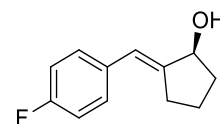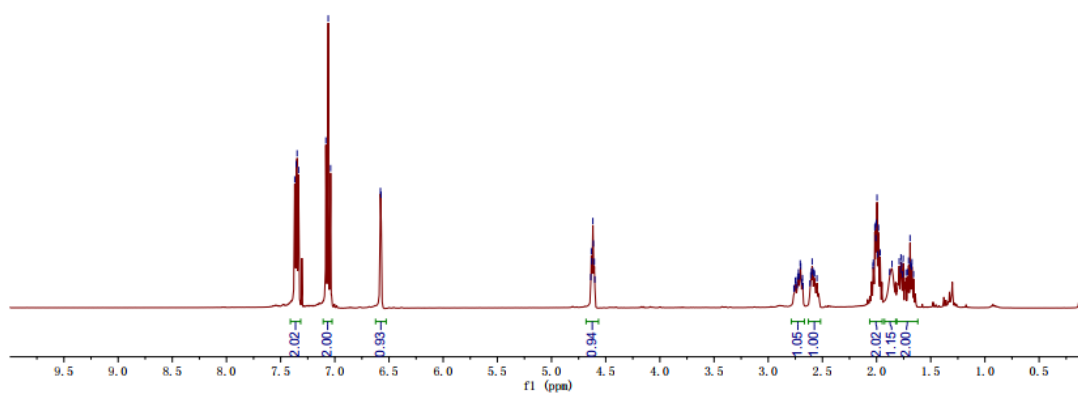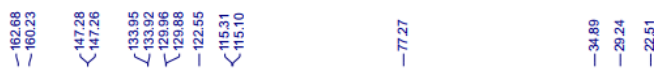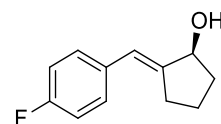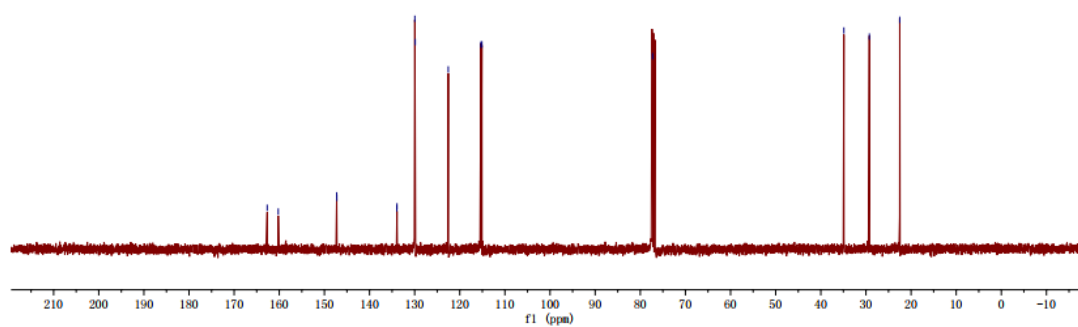

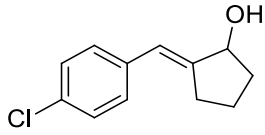

3I

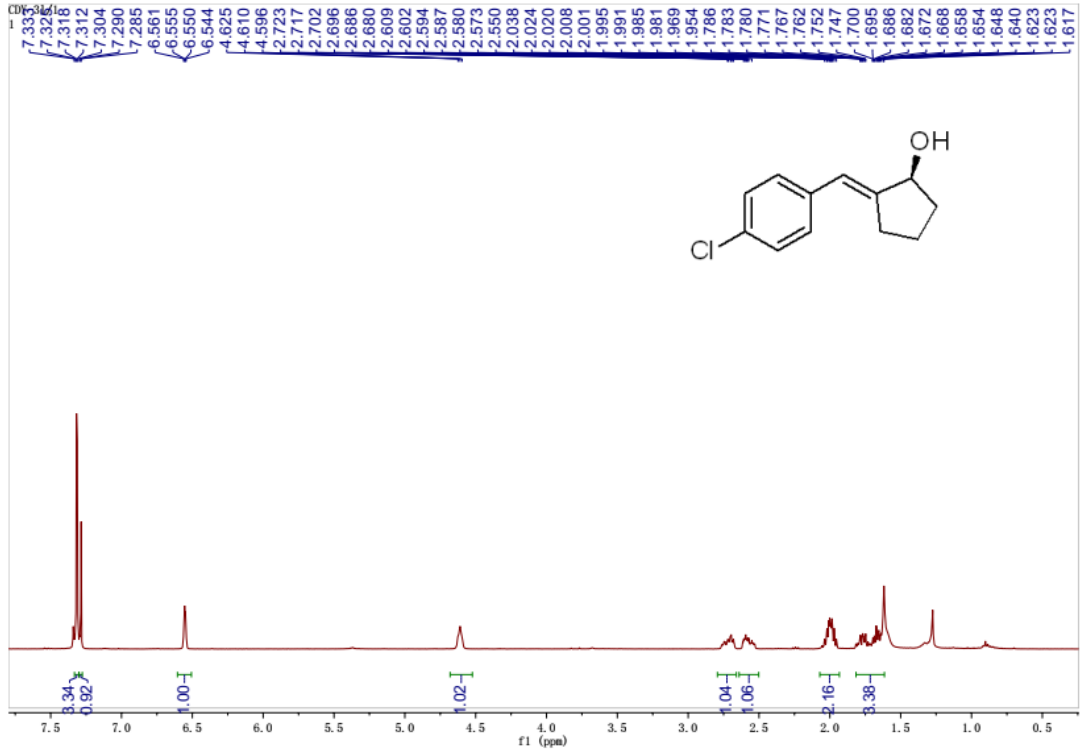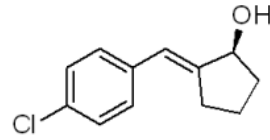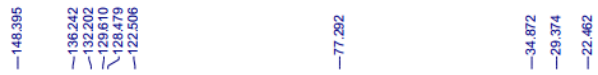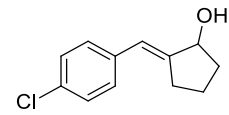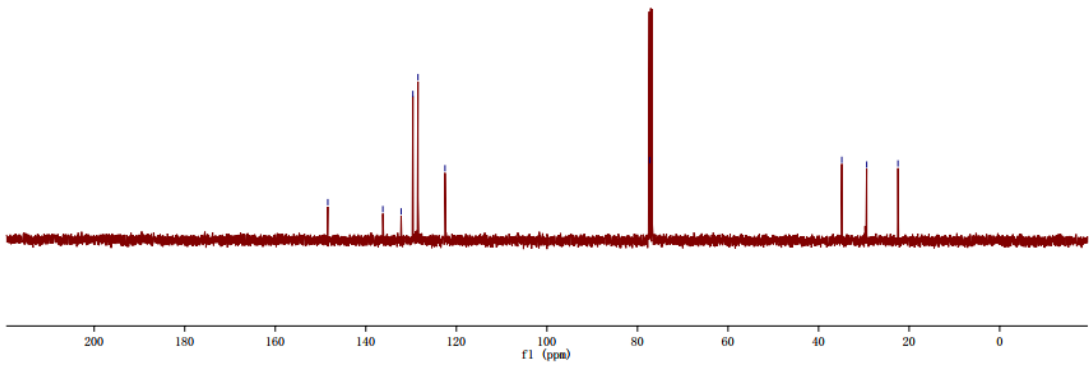

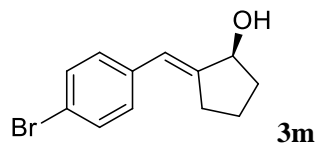

7.505  
 7.484  
 7.270  
 7.249  
 — 6.551  
 4.634  
 4.620  
 4.606  
 2.766  
 2.752  
 2.746  
 2.728  
 2.723  
 2.708  
 2.703  
 2.622  
 2.616  
 2.609  
 2.602  
 2.595  
 2.588  
 2.580  
 2.572  
 2.557  
 2.550  
 2.543  
 2.537  
 2.054  
 2.038  
 2.025  
 2.018  
 2.004  
 1.989  
 1.973  
 1.801  
 1.783  
 1.777  
 1.762  
 1.712  
 1.703  
 1.688

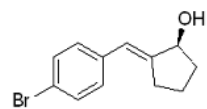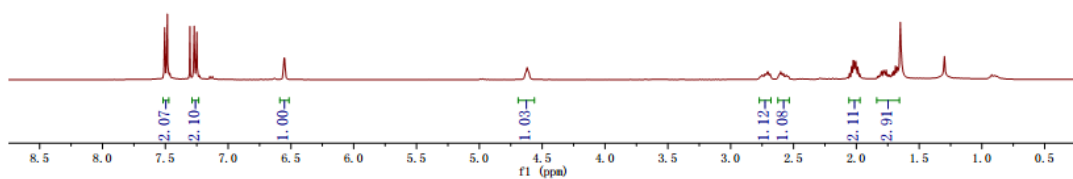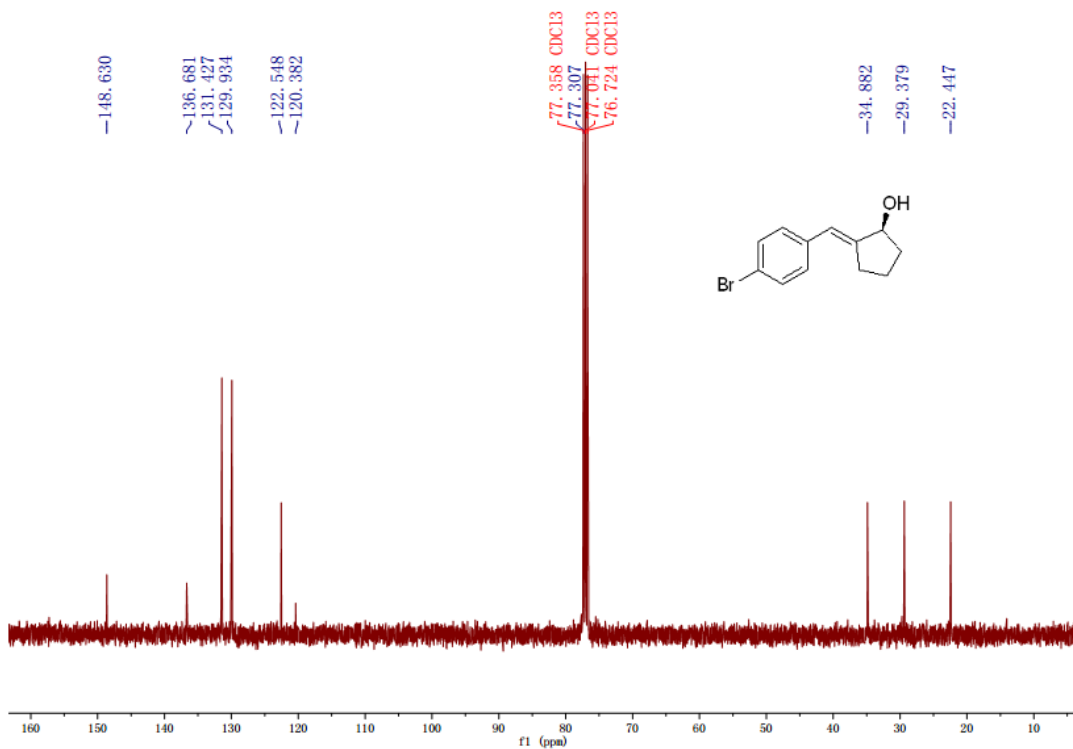

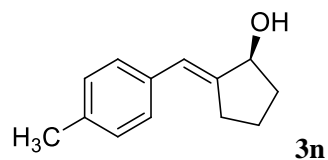

7.315  
 7.295  
 7.205  
 7.185  
 6.602  
 6.596  
 6.591  
 6.585  
 4.645  
 4.641  
 4.631  
 4.618  
 2.813  
 2.803  
 2.794  
 2.771  
 2.763  
 2.749  
 2.728  
 2.646  
 2.637  
 2.631  
 2.624  
 2.609  
 2.592  
 2.580  
 2.565  
 2.390  
 2.053  
 2.049  
 2.036  
 2.032  
 2.022  
 2.008  
 2.002  
 1.998  
 1.994  
 1.989  
 1.974  
 1.957  
 1.818  
 1.809  
 1.803  
 1.797  
 1.781  
 1.772  
 1.751  
 1.730  
 1.717  
 1.703  
 1.686  
 1.670

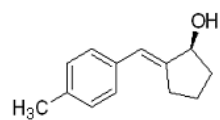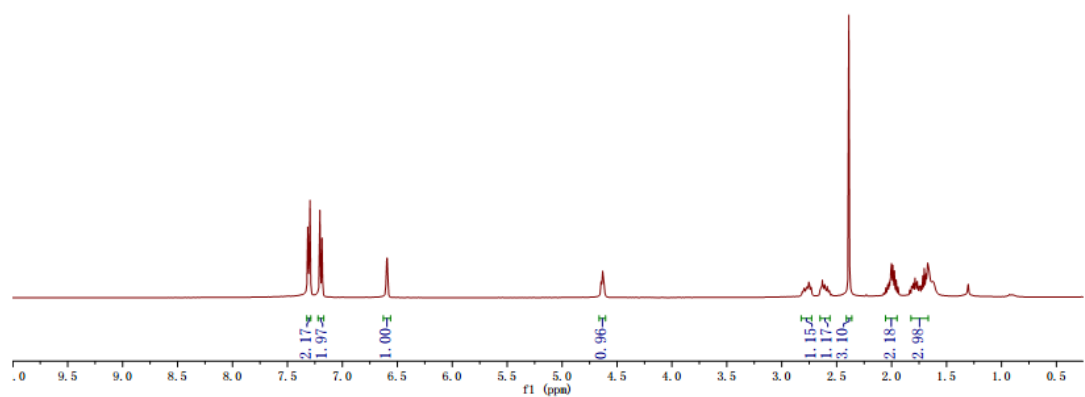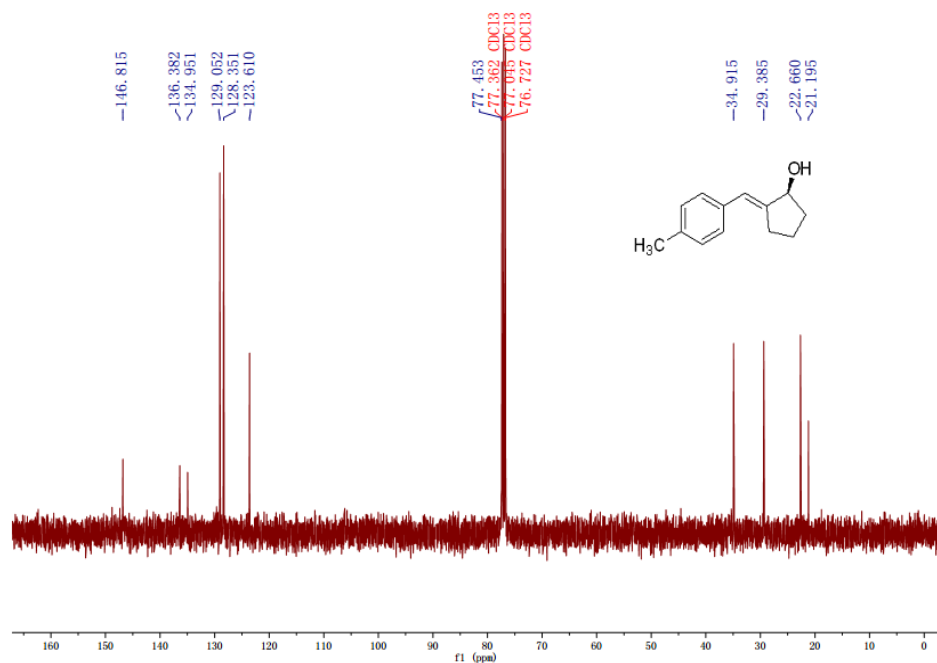

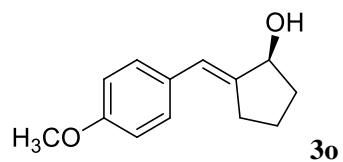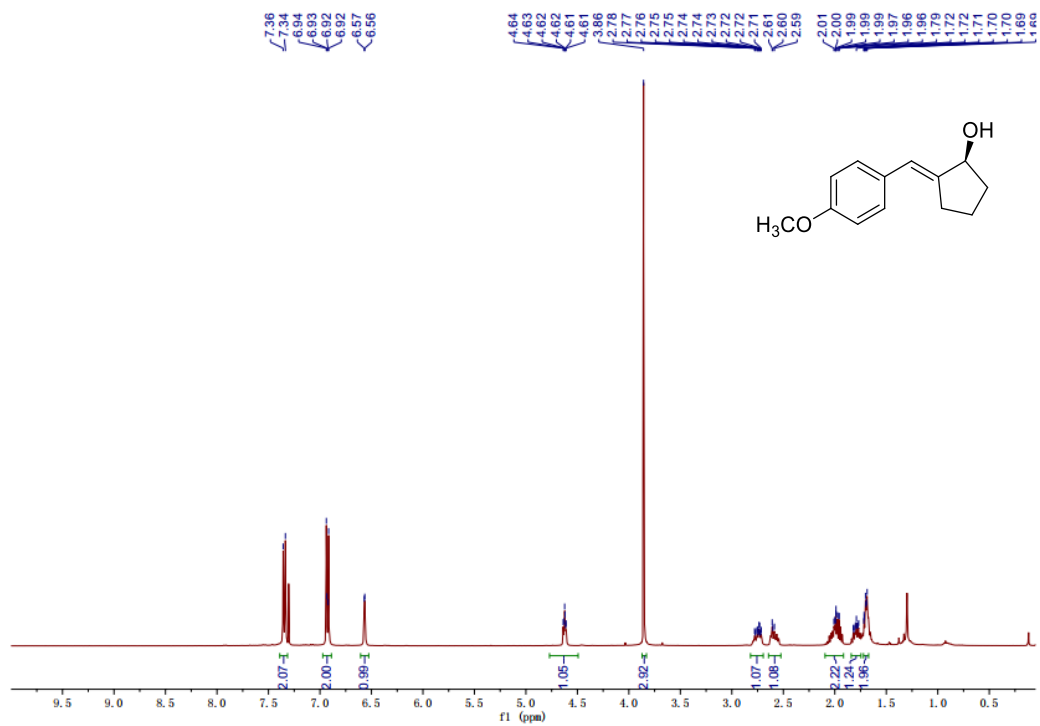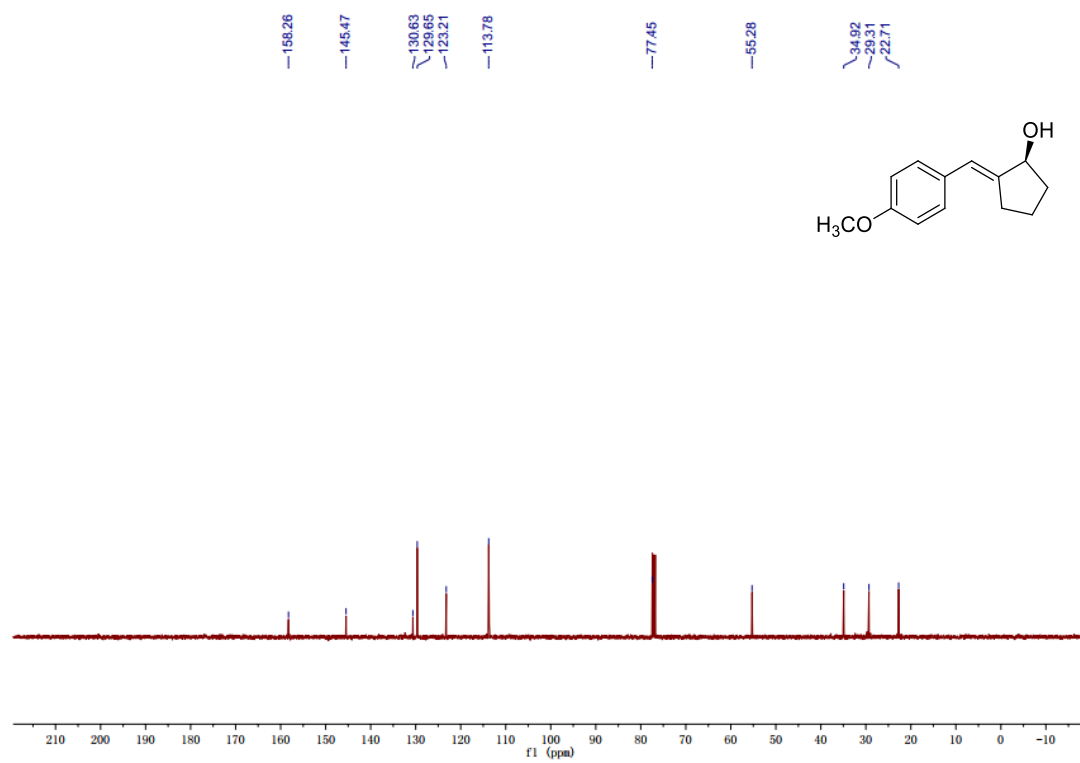

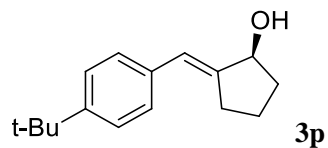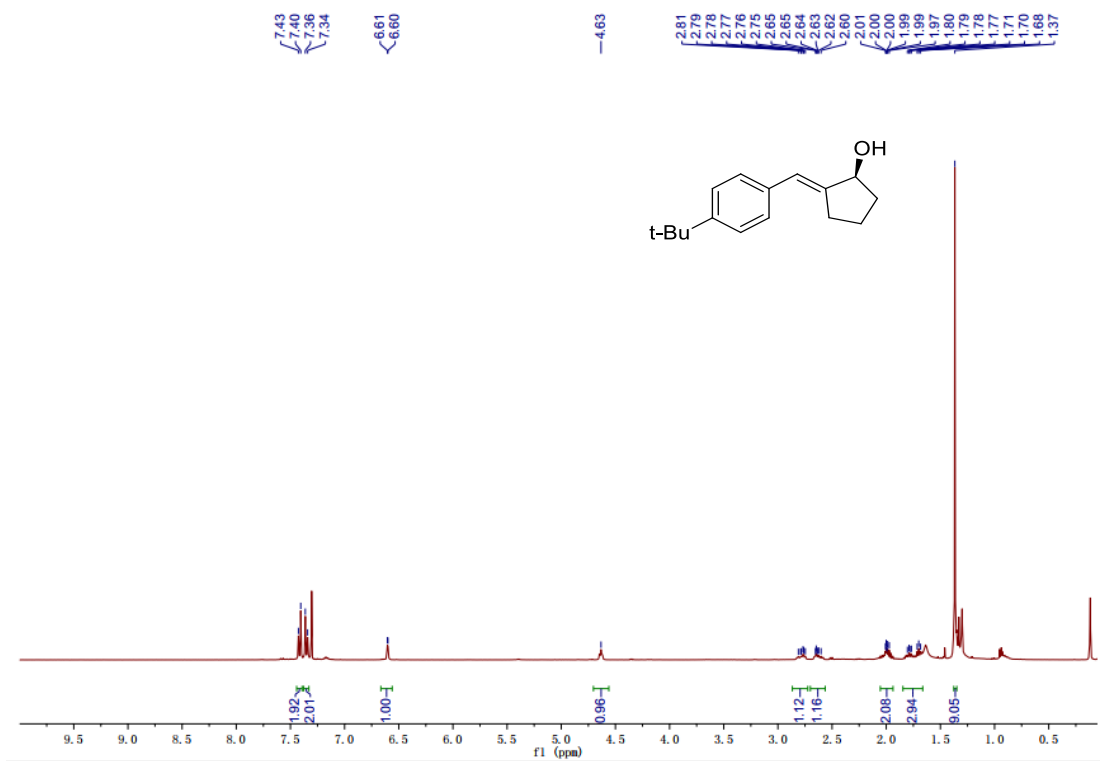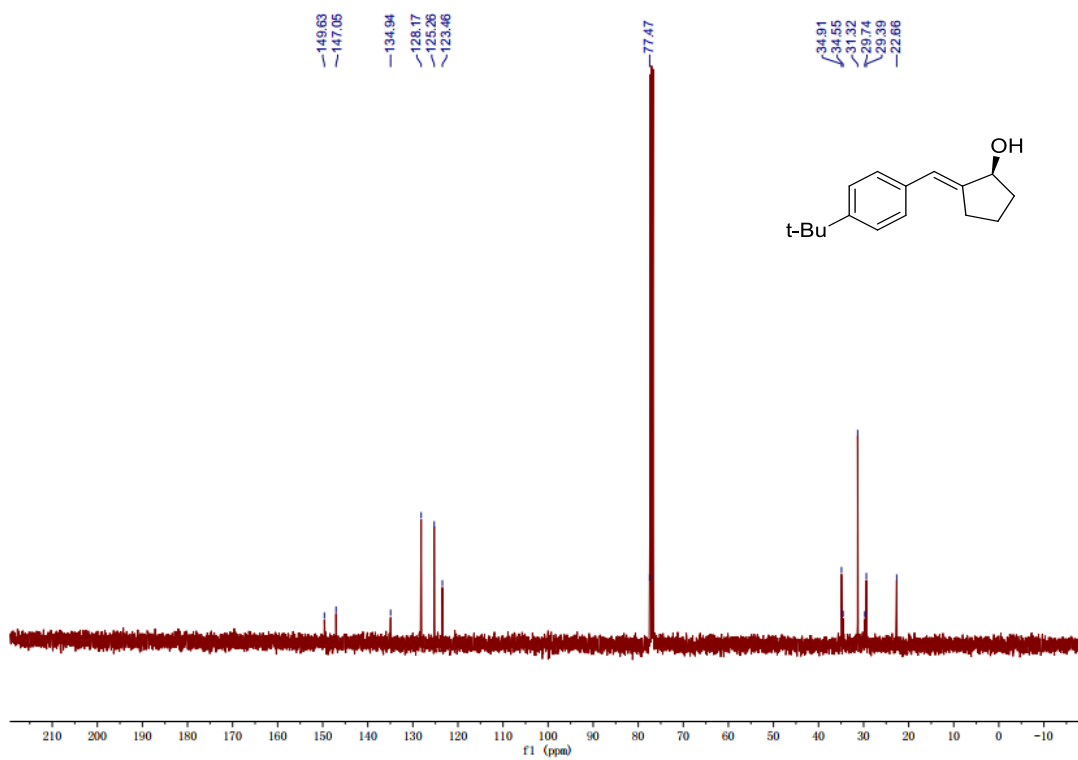

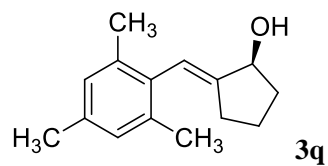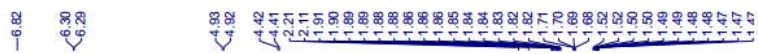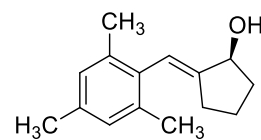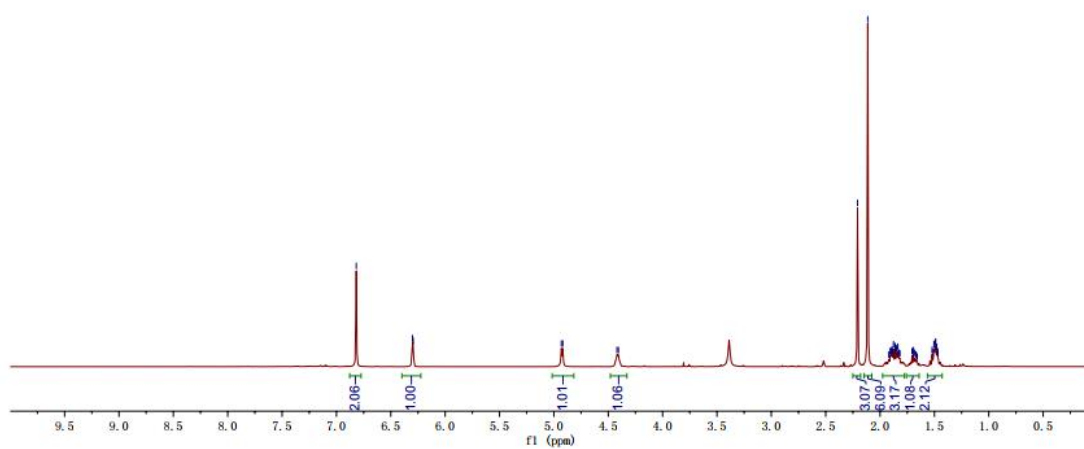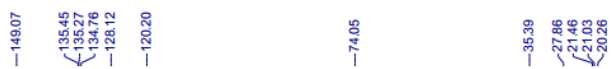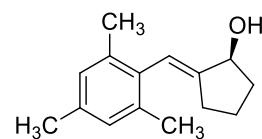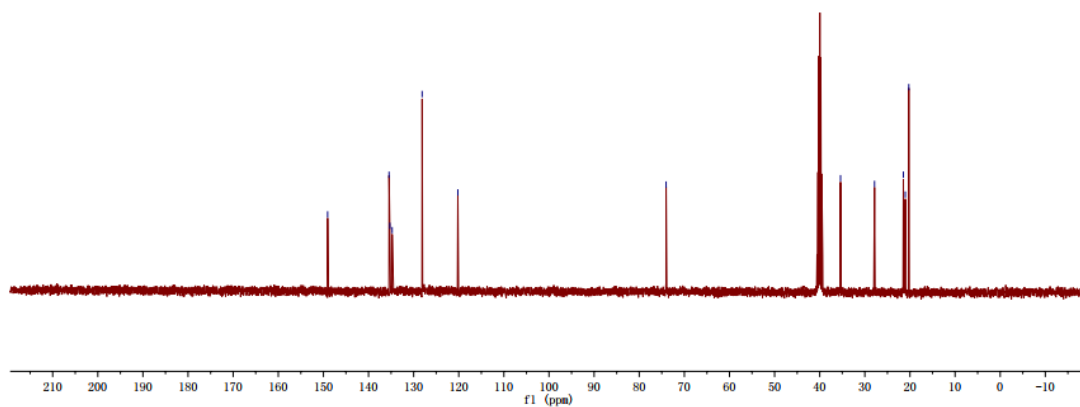



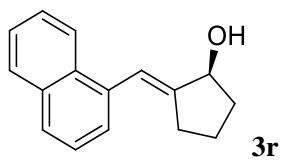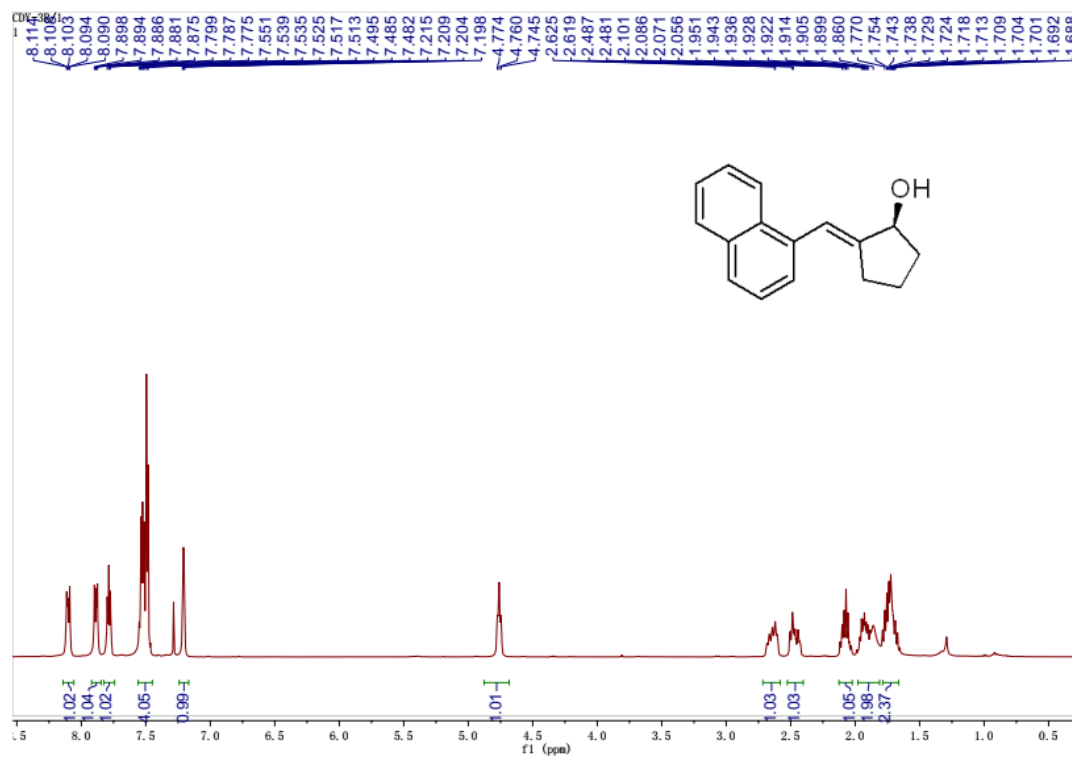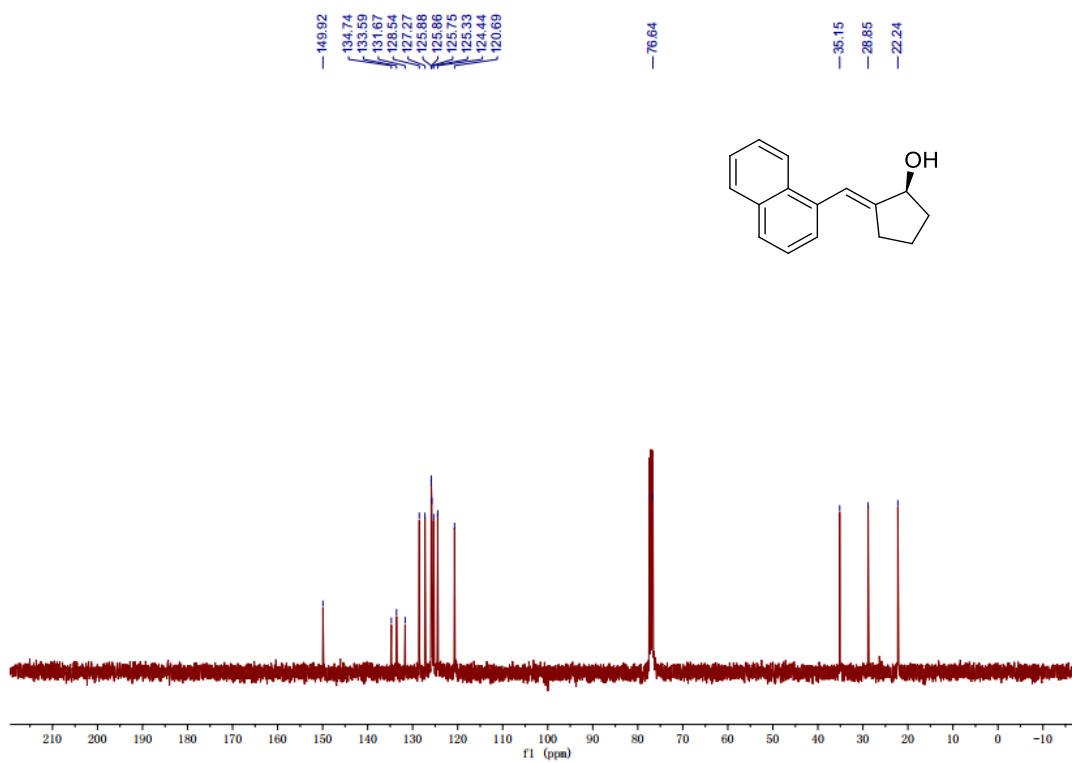

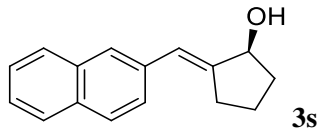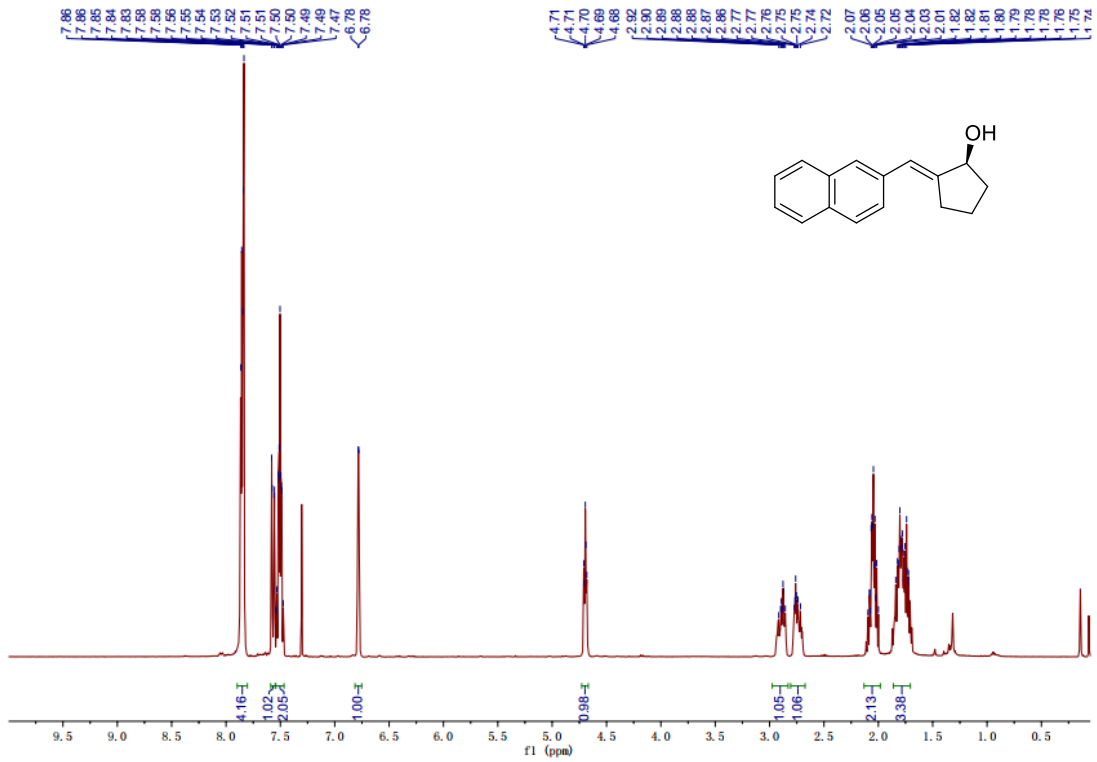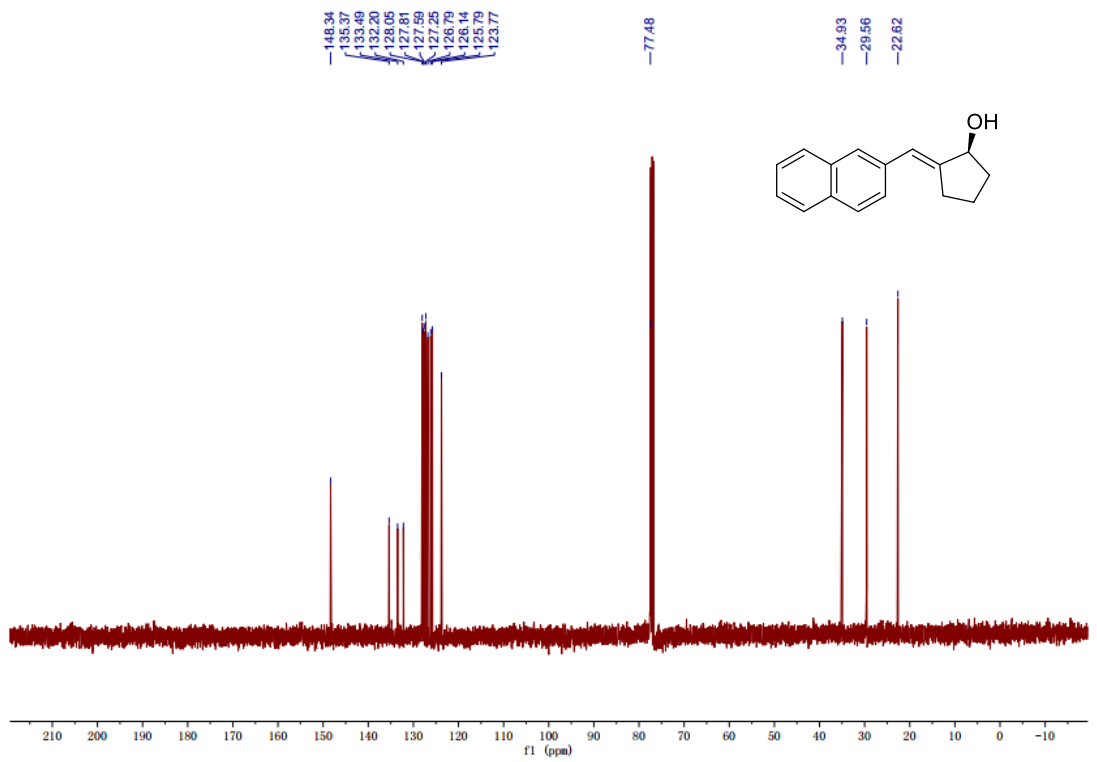

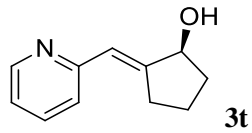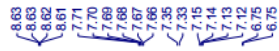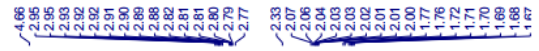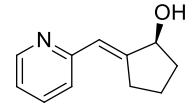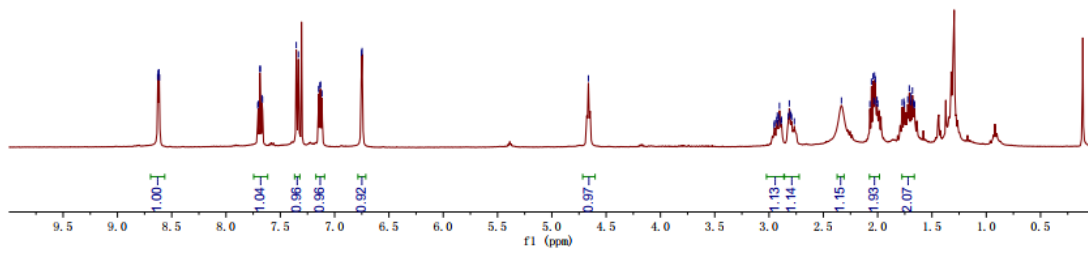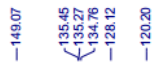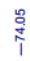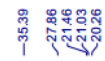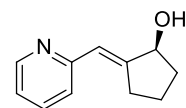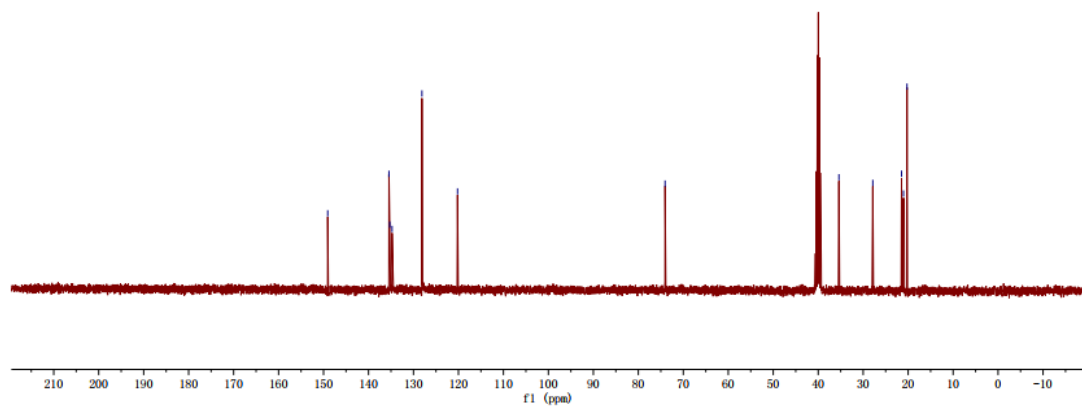

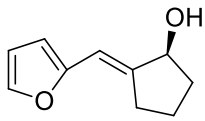

3u

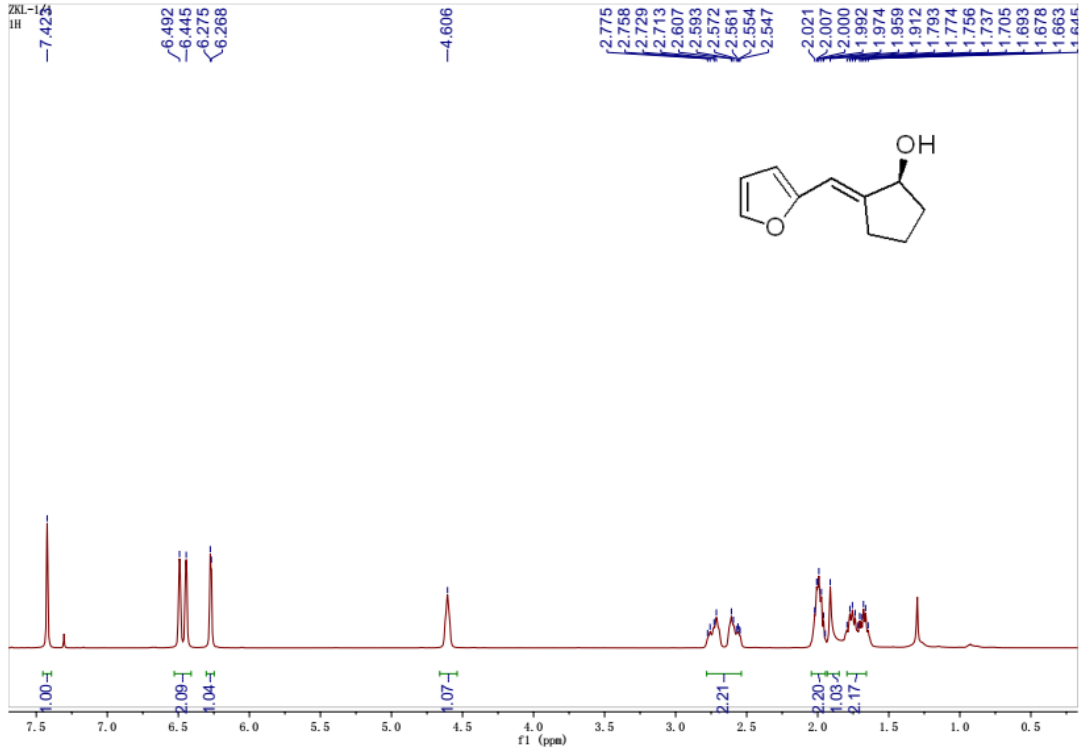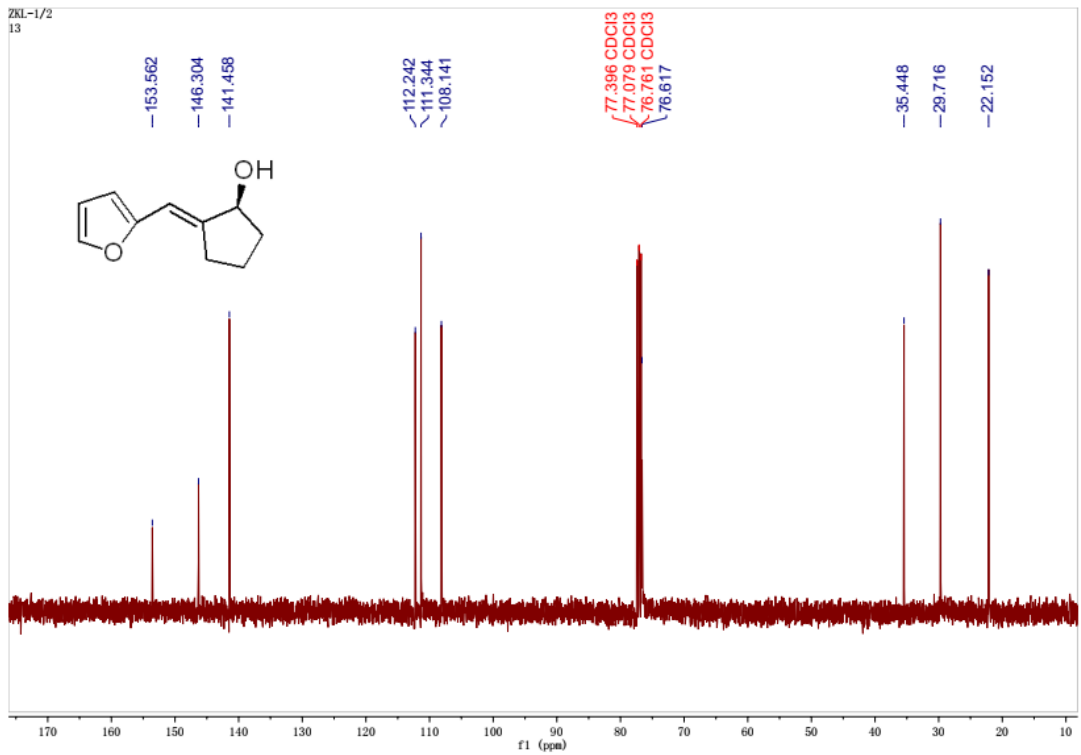

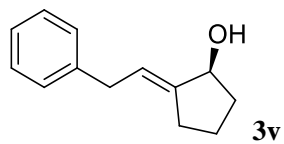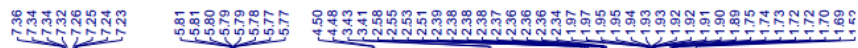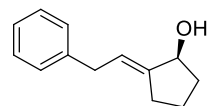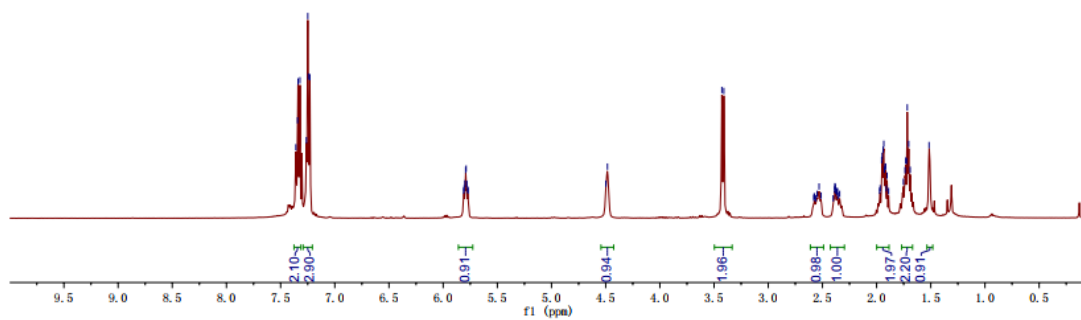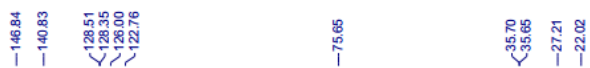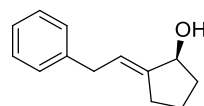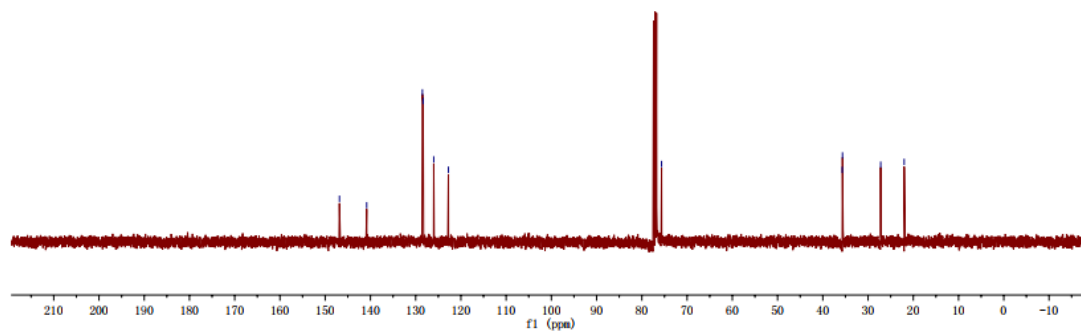

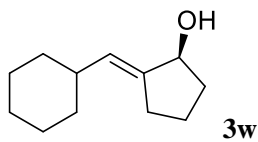

5.422  
 5.418  
 5.400  
 5.394  
 4.409  
 4.397  
 4.385  
 2.443  
 2.426  
 2.419  
 2.411  
 2.403  
 2.398  
 2.388  
 2.382  
 2.266  
 2.254  
 2.248  
 2.245  
 2.236  
 2.230  
 2.210  
 2.204  
 2.101  
 2.097  
 2.091  
 2.081  
 2.069  
 1.964  
 2.056  
 1.978  
 1.873  
 1.863  
 1.858  
 1.853  
 1.848  
 1.844  
 1.830  
 1.764  
 1.755  
 1.745  
 1.733  
 1.723  
 1.715  
 1.698  
 1.692  
 1.685  
 1.678  
 1.671  
 1.665  
 1.659  
 1.647  
 1.634  
 1.327  
 1.319  
 1.311  
 1.295  
 1.287  
 1.280  
 1.265  
 1.257  
 1.246  
 1.239  
 1.217  
 1.209  
 1.187  
 1.139  
 1.110  
 1.102  
 1.066  
 1.079  
 1.072

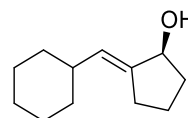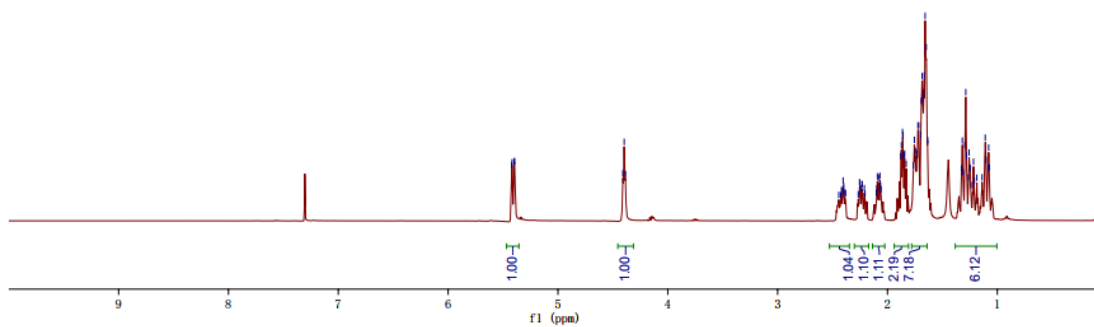

143.983  
 130.218  
 75.704  
 38.506  
 35.506  
 32.841  
 32.709  
 26.771  
 26.095  
 25.988  
 22.125

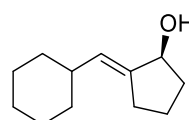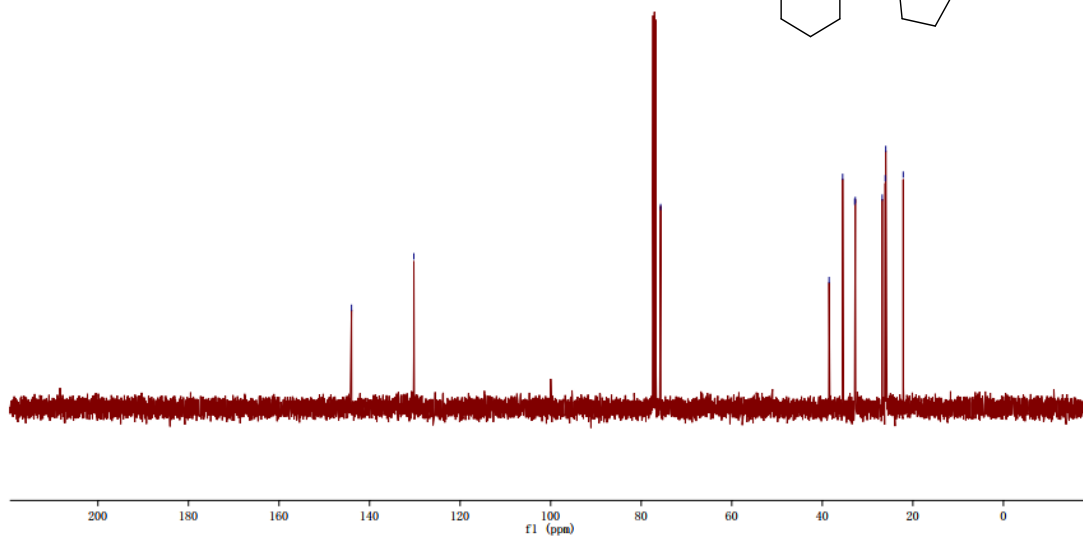

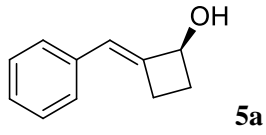

7.39  
 7.37  
 7.36  
 7.35  
 7.32  
 7.32  
 7.30  
 7.30  
 7.27  
 7.27  
 7.26  
 7.26  
 7.25  
 7.24  
 7.23  
 6.48  
 6.47  
 4.91  
 4.89  
 4.88  
 4.87  
 2.87  
 2.85  
 2.85  
 2.84  
 2.84  
 2.83  
 2.82  
 2.82  
 2.81  
 2.81  
 2.81  
 2.80  
 2.80  
 2.76  
 2.76  
 2.74  
 2.74  
 2.72  
 2.72  
 2.70  
 2.70  
 2.60  
 2.59  
 2.58  
 2.58  
 2.57  
 2.57  
 2.56  
 2.55  
 2.55  
 2.54  
 2.54  
 2.05  
 2.04  
 2.03  
 2.03  
 2.01  
 2.01  
 2.00  
 2.00  
 1.99  
 1.98  
 1.96

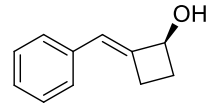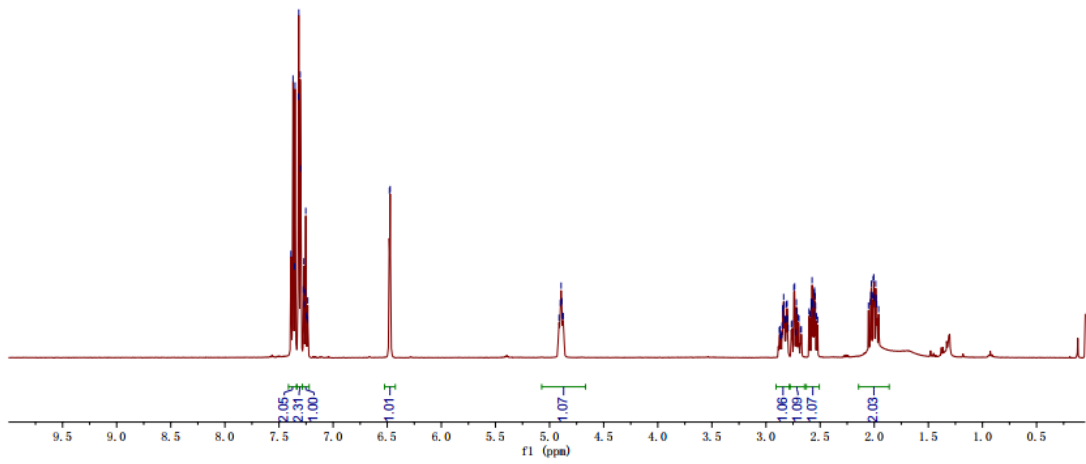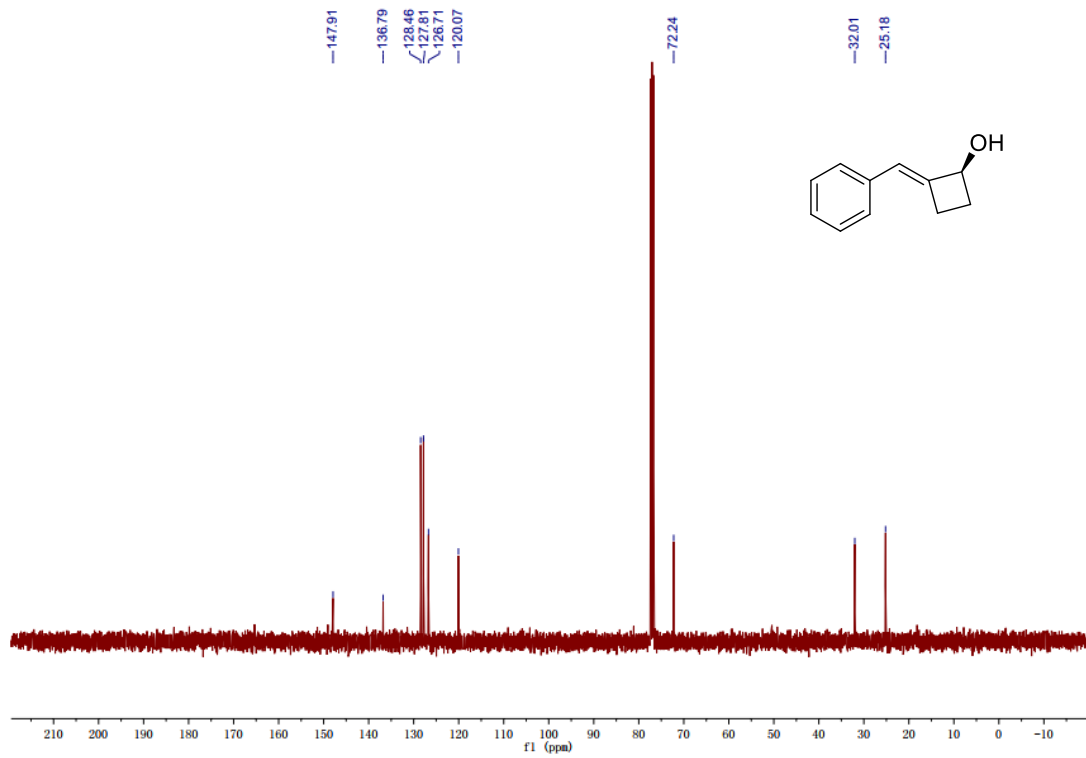

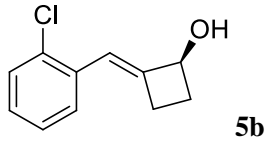

7.42, 7.42, 7.40, 7.40, 7.37, 7.36, 7.35, 7.34, 7.27, 7.25, 7.23, 7.23, 7.21, 7.20, 7.19, 7.18, 7.17, 7.16, 6.85, 6.84, 6.83

2.72, 2.71, 2.70, 2.69, 2.68, 2.67, 2.60, 2.58, 2.57, 2.55, 2.54, 2.53, 2.52, 2.15, 2.00, 2.00, 2.00, 1.98, 1.98, 1.97, 1.95

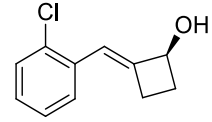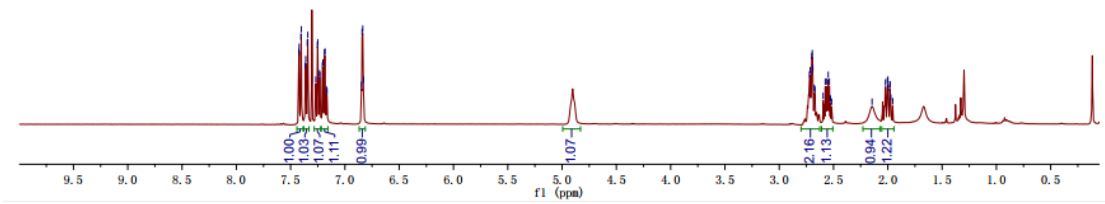

-150.43, 134.32, 133.13, 128.77, 127.85, 126.48, 116.10, -72.24, -31.80, -24.87

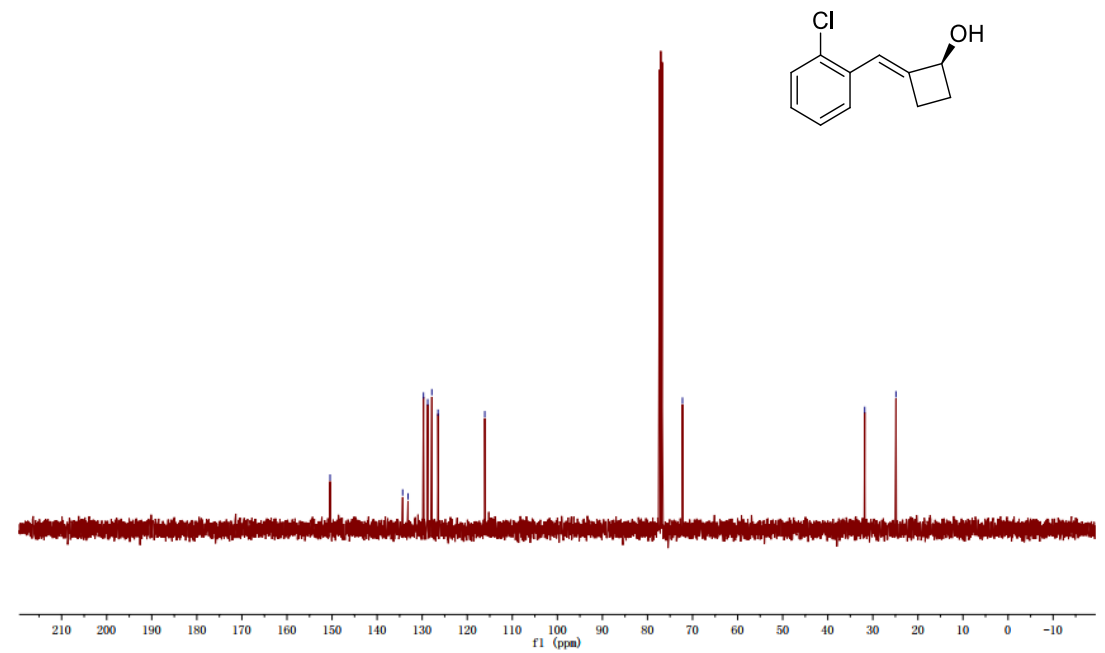



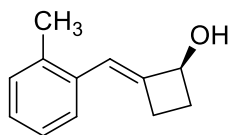

5c

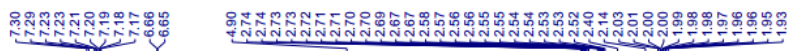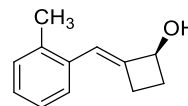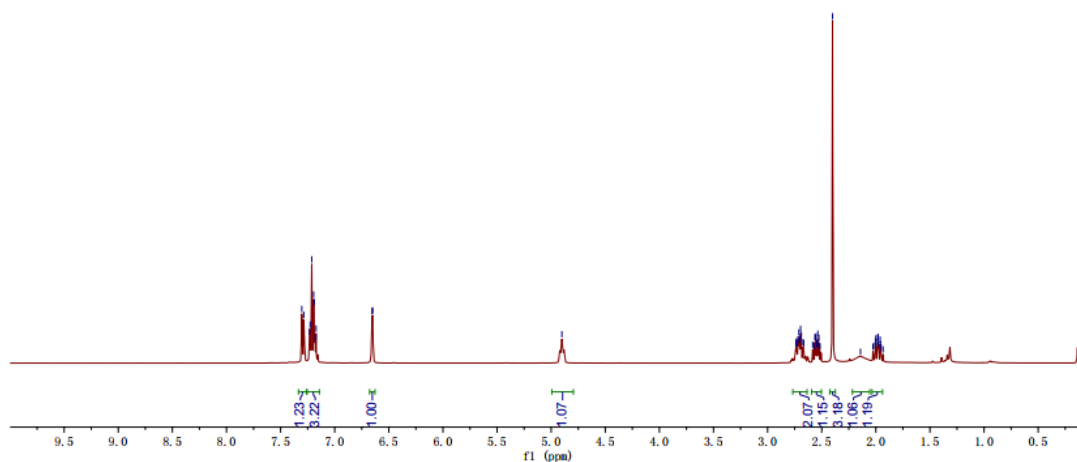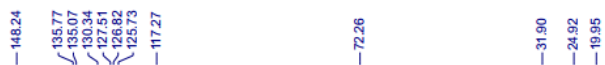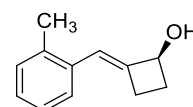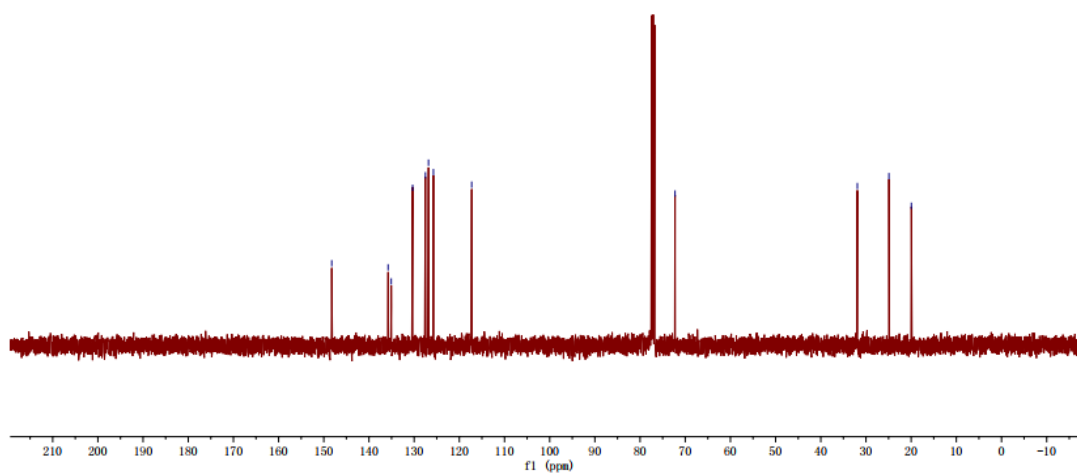

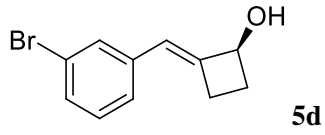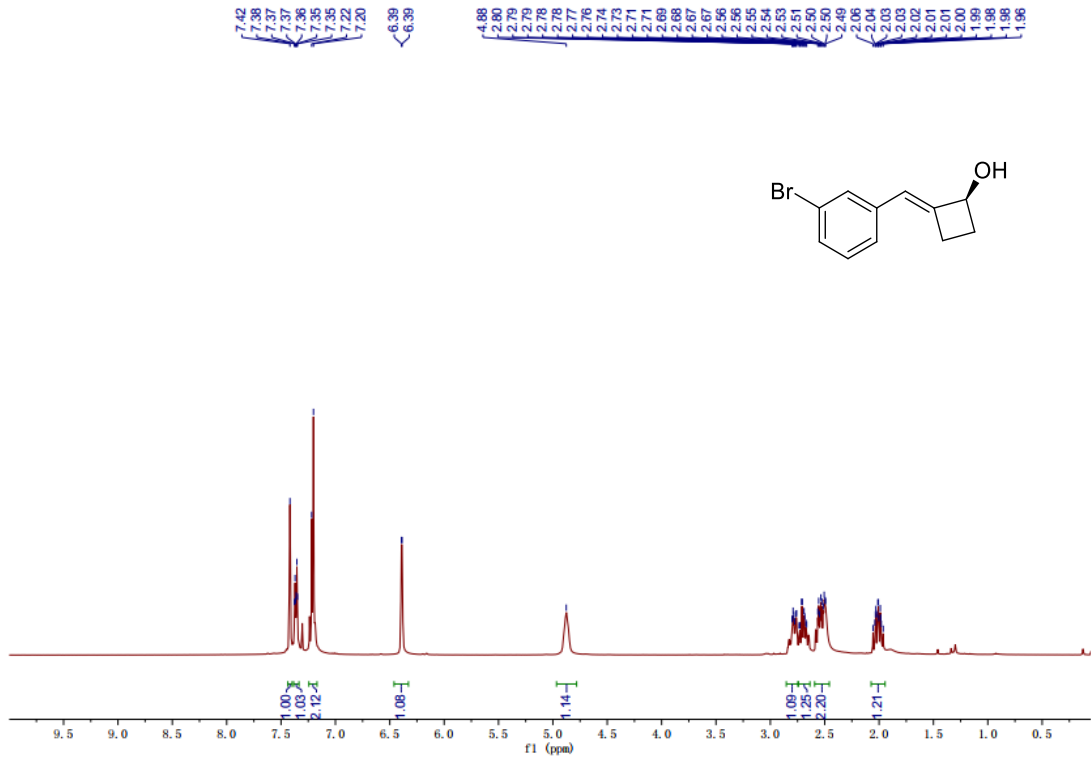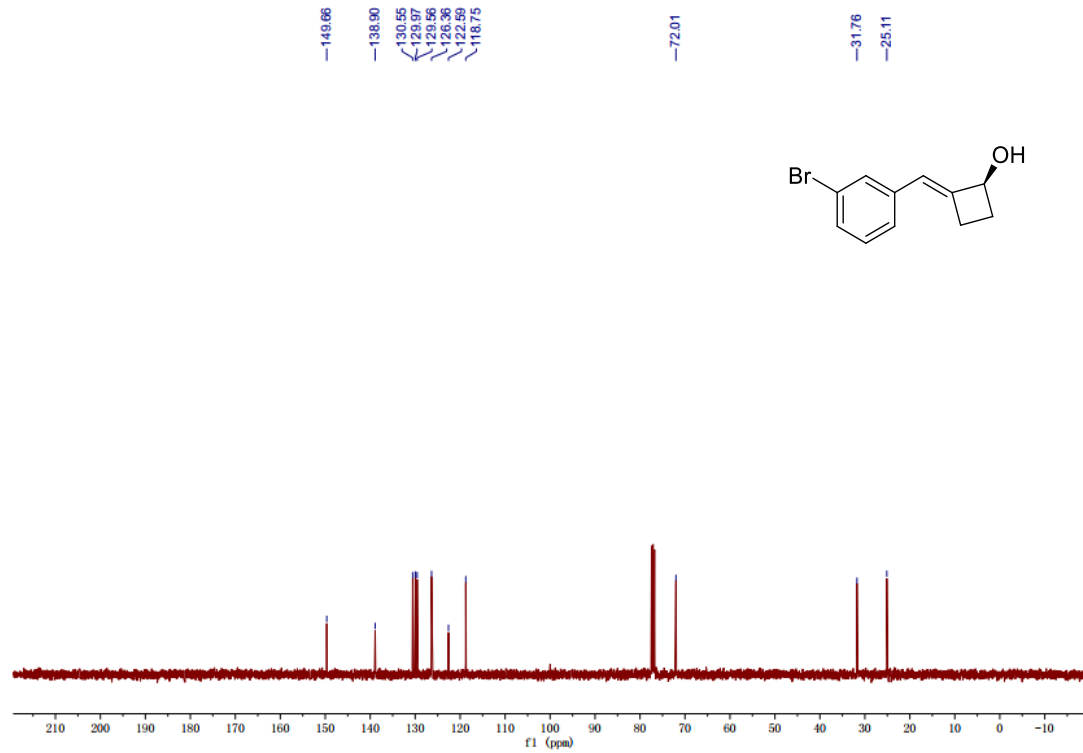

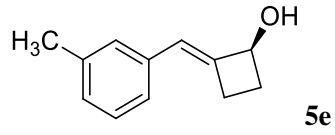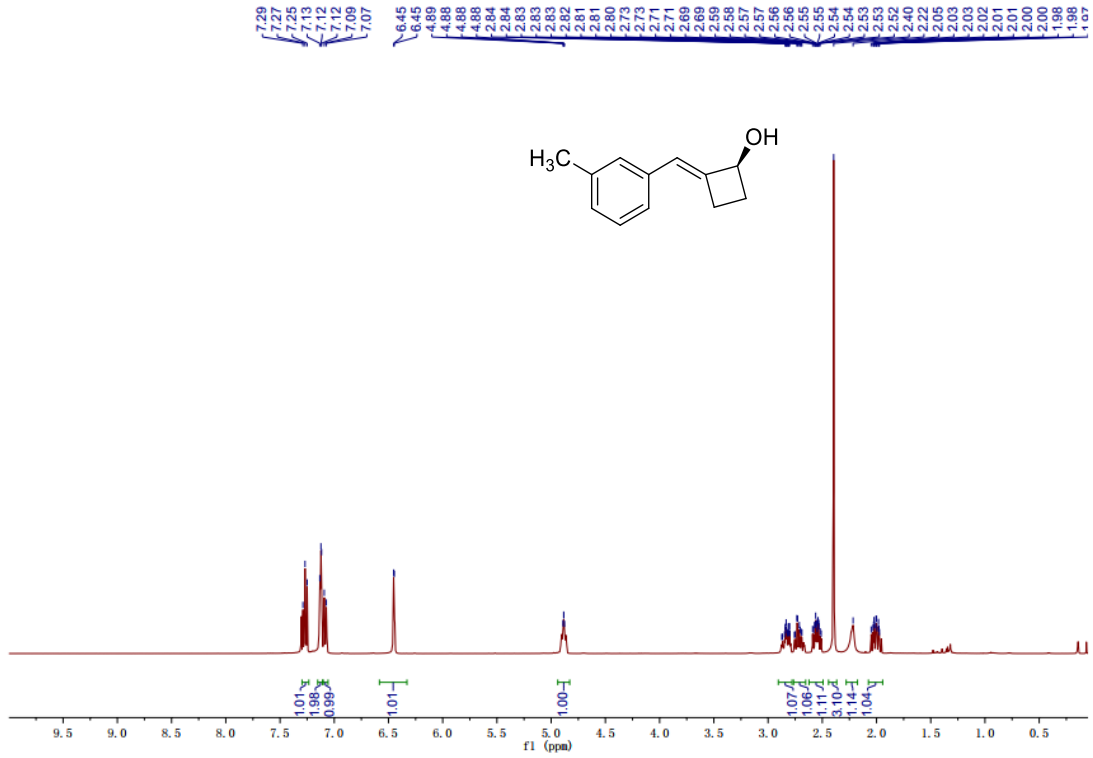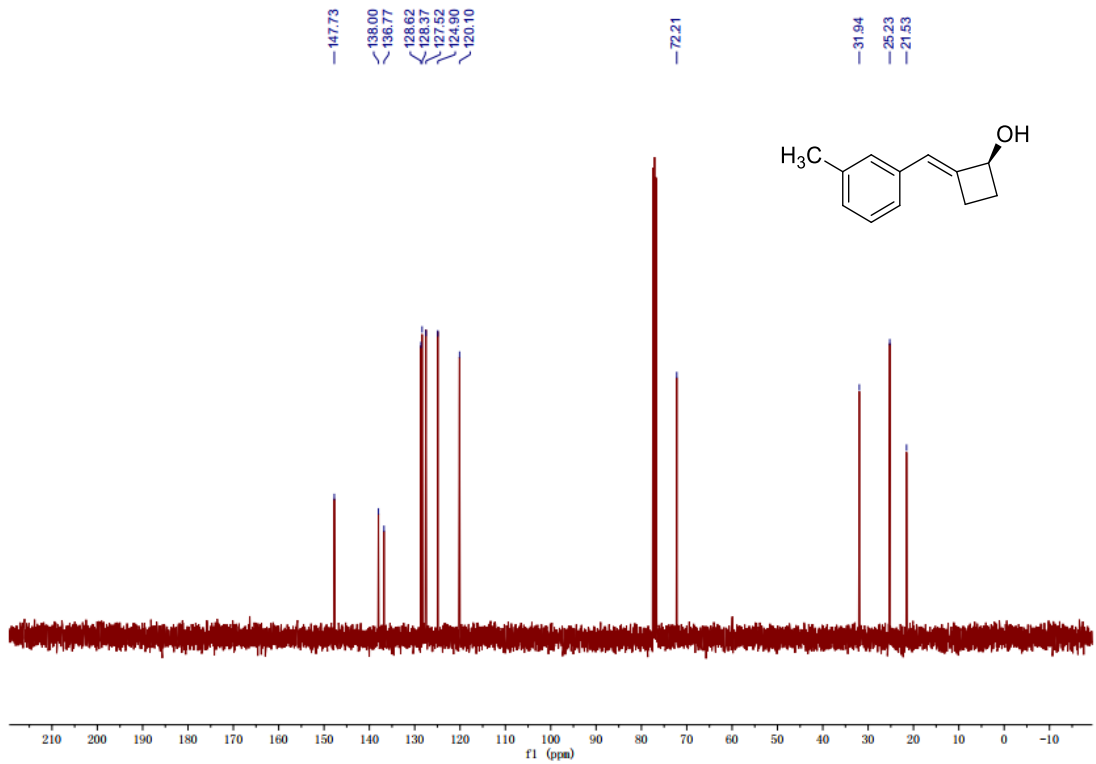

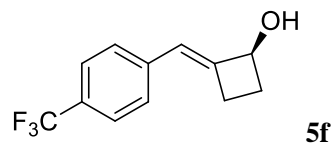

7.66  
 7.61  
 7.59  
 7.45  
 7.43  
 7.38  
 7.36  
 6.58  
 6.57  
 6.50  
 6.50  
 4.96  
 4.94  
 4.92  
 4.90  
 2.85  
 2.84  
 2.82  
 2.81  
 2.80  
 2.79  
 2.78  
 2.77  
 2.76  
 2.76  
 2.74  
 2.74  
 2.72  
 2.62  
 2.62  
 2.61  
 2.60  
 2.59  
 2.58  
 2.57  
 2.56  
 2.55  
 2.54  
 2.53  
 2.45  
 2.43  
 2.41  
 2.08  
 2.06  
 2.06  
 2.04  
 2.01

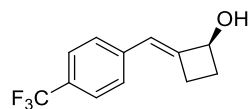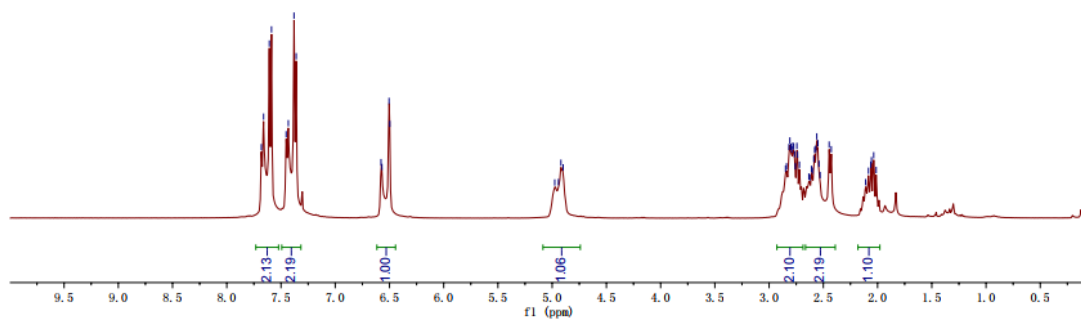

150.04  
 150.87  
 140.27  
 127.90  
 127.83  
 125.45  
 125.42  
 125.36  
 118.96  
 118.89  
 72.06  
 72.00  
 31.76  
 31.70  
 25.28  
 25.21

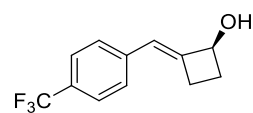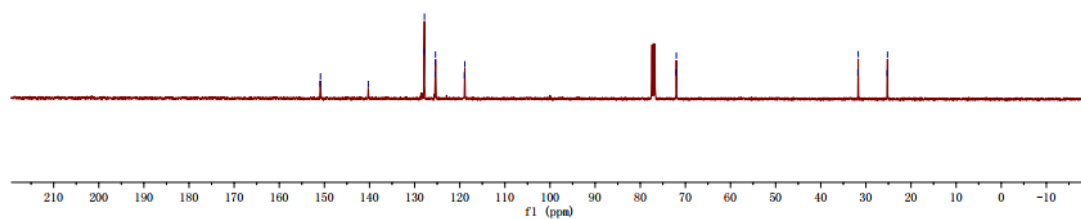

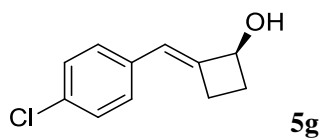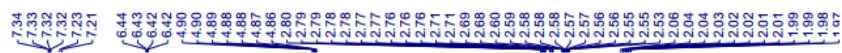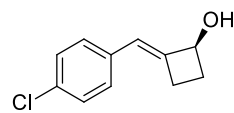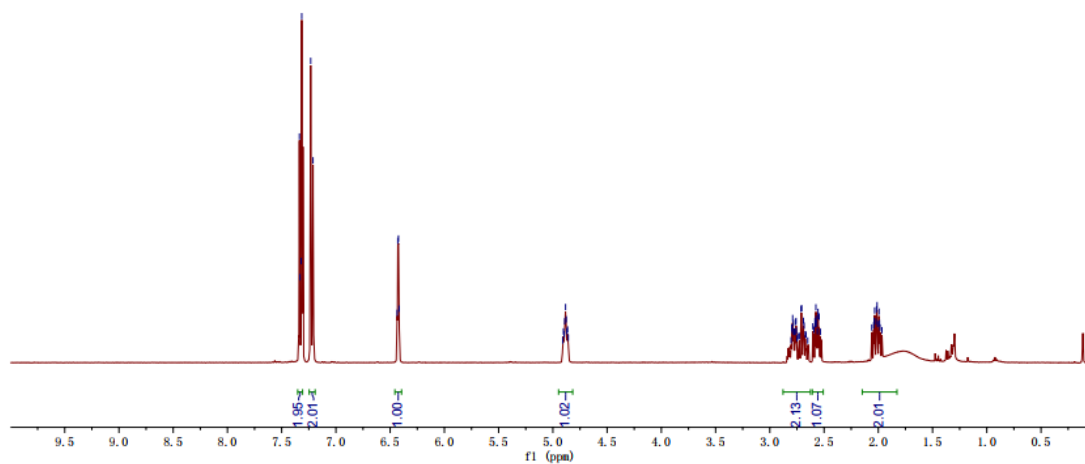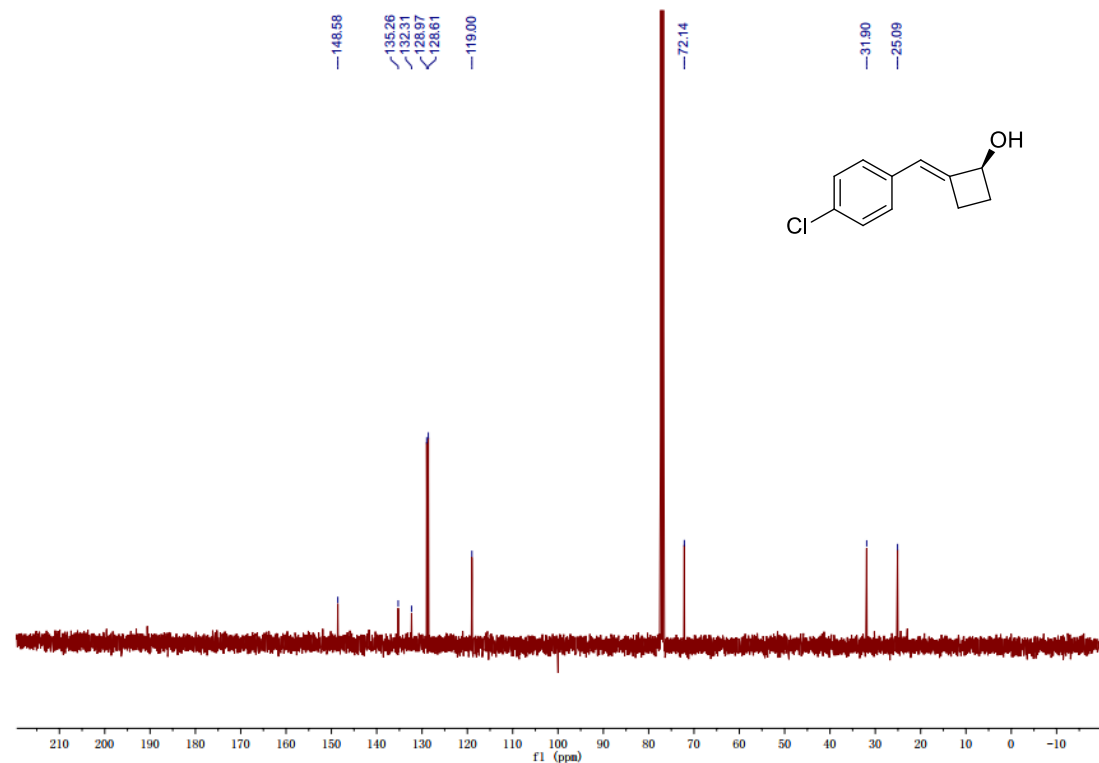

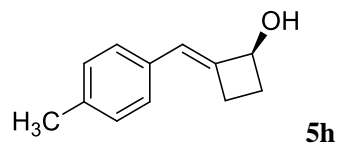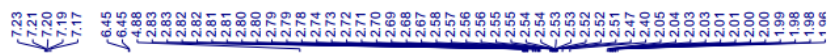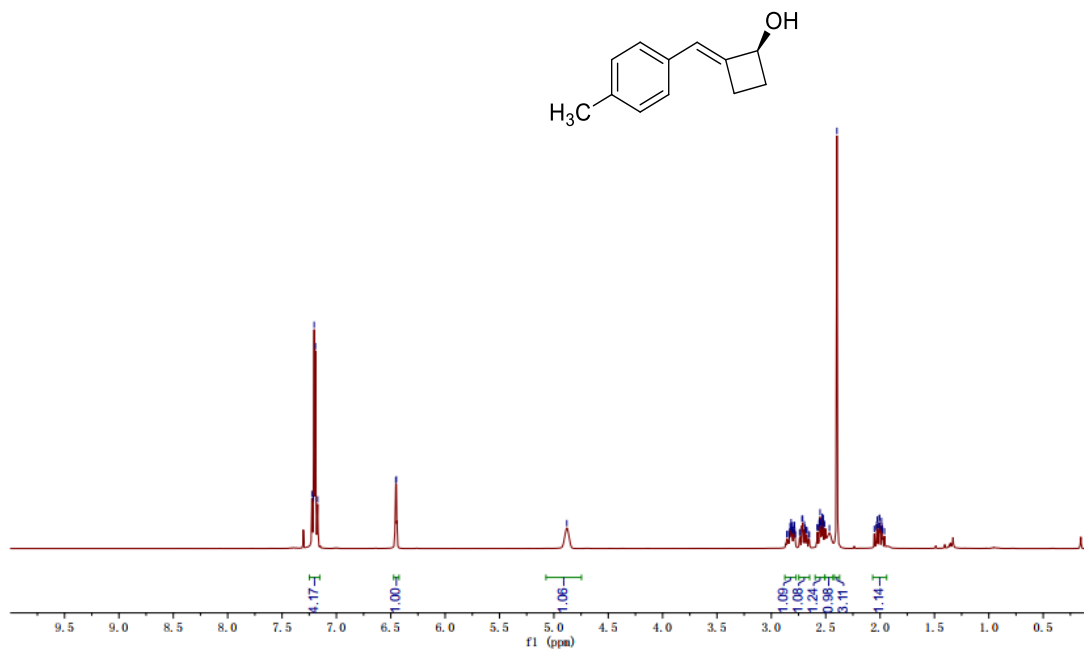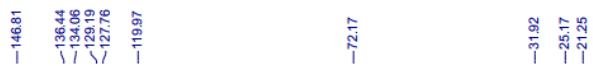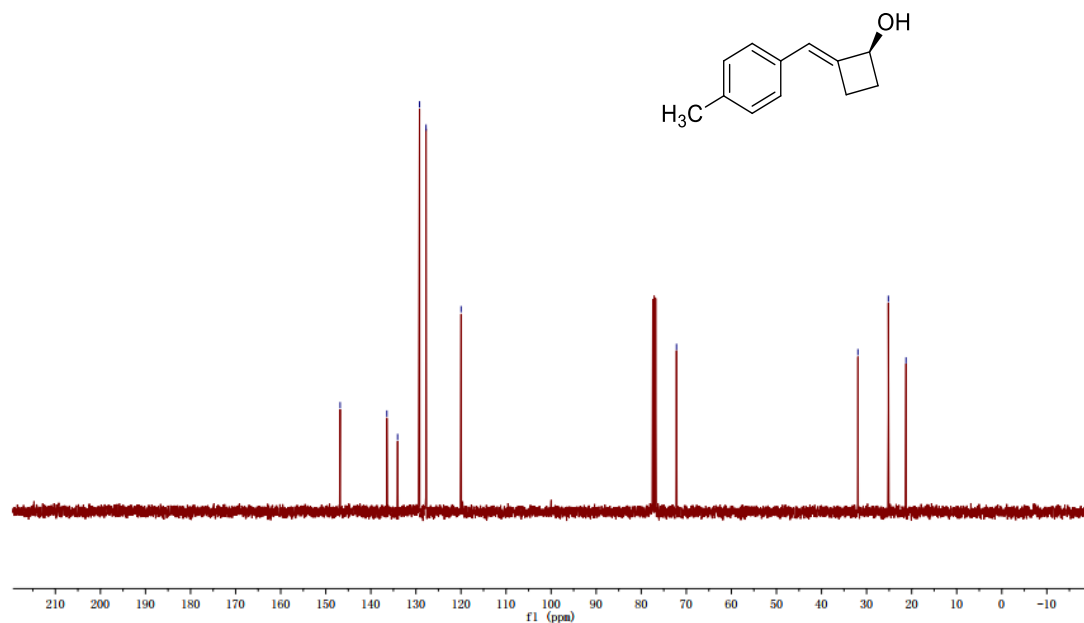

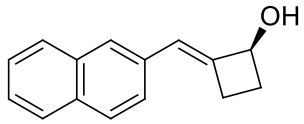

5i

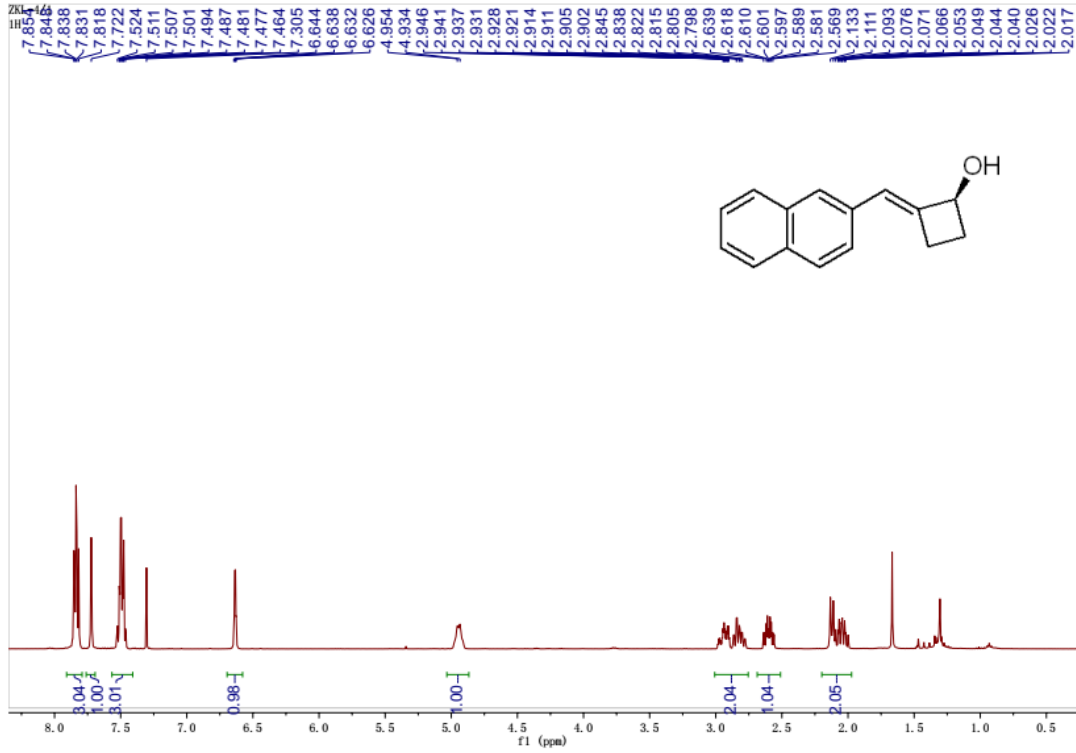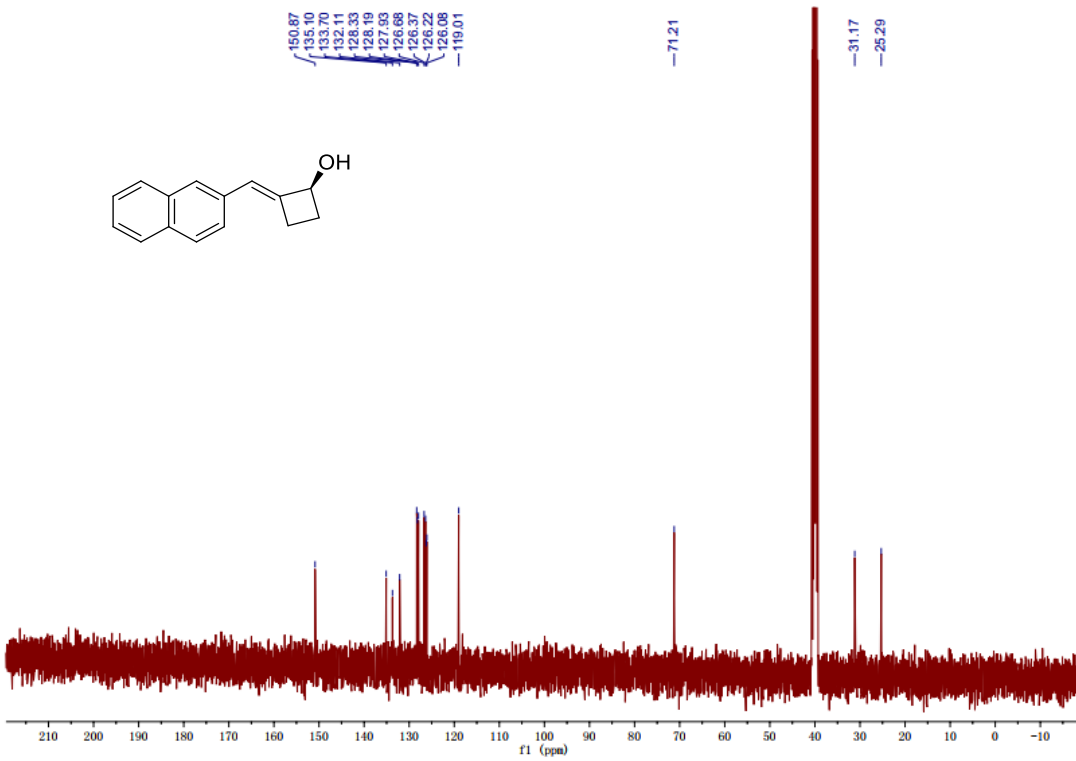

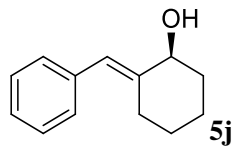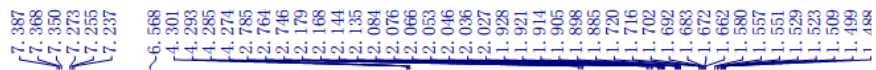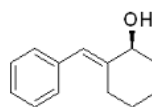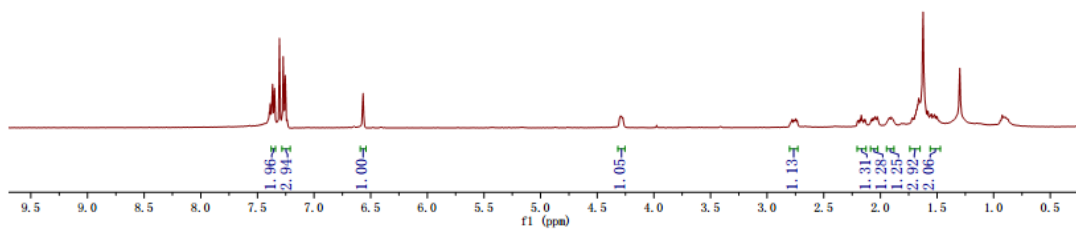

-144.371

-137.675

~128.950

~128.118

~126.261

-120.824

77.363 CDCl<sub>3</sub>

77.045 CDCl<sub>3</sub>

76.727 CDCl<sub>3</sub>

73.794

-36.594

~27.381

~27.009

~23.226

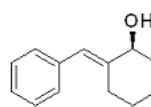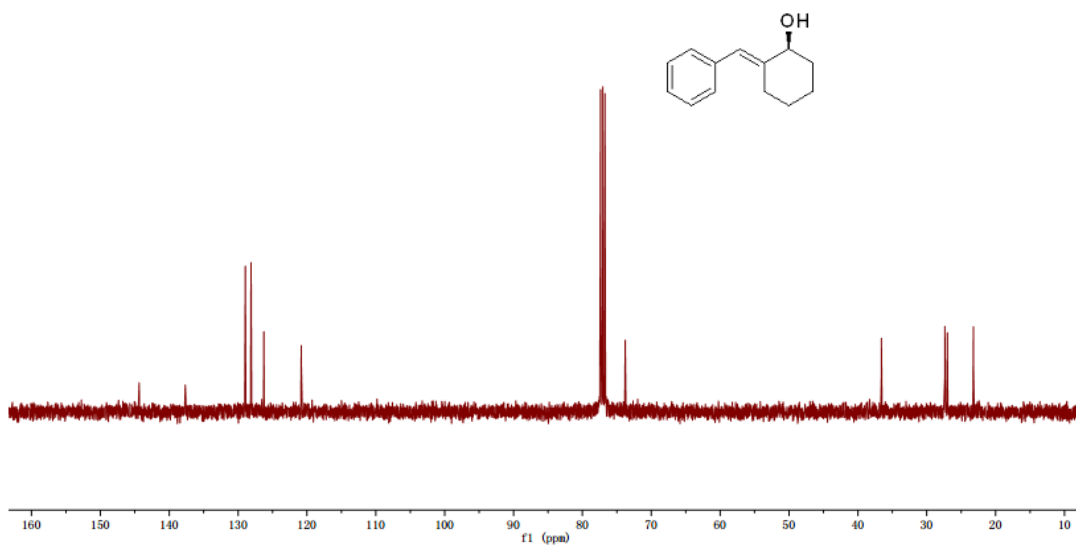



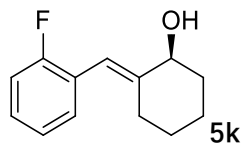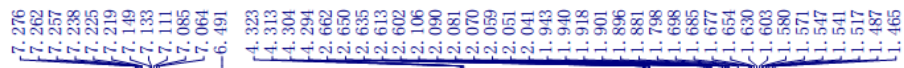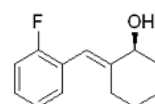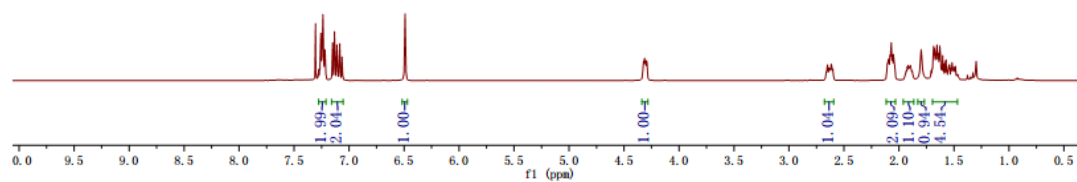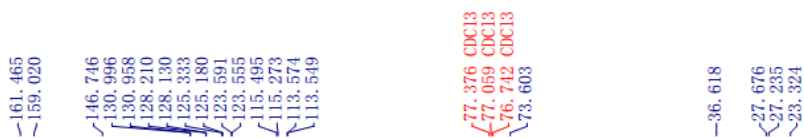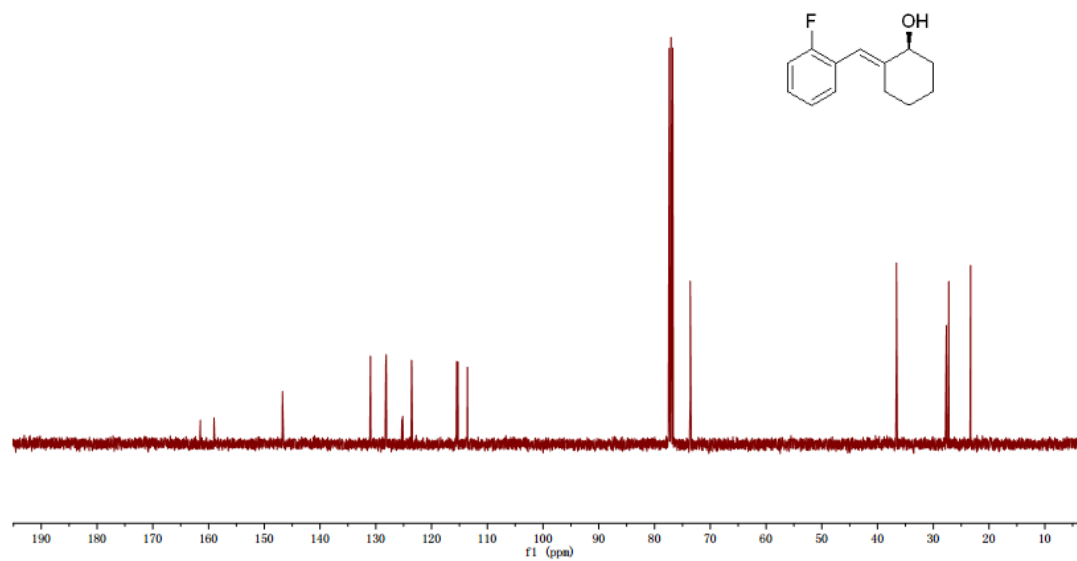

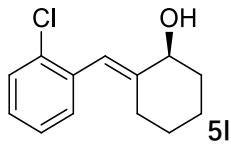

7.430  
7.412  
7.278  
7.256  
7.242  
7.233  
7.214  
7.206  
7.201  
7.192  
6.566  
4.338  
4.327  
4.316  
4.306  
2.627  
2.614  
2.601  
2.593  
2.582  
2.567  
2.109  
2.100  
2.089  
2.071  
2.062  
2.051  
2.038  
2.029  
2.014  
2.005  
1.937  
1.929  
1.921  
1.913  
1.903  
1.885  
1.778  
1.720  
1.711  
1.697  
1.688  
1.666  
1.636  
1.622  
1.613  
1.605  
1.596  
1.582  
1.573  
1.558  
1.549  
1.533  
1.520  
1.510  
1.504  
1.489  
1.480

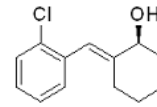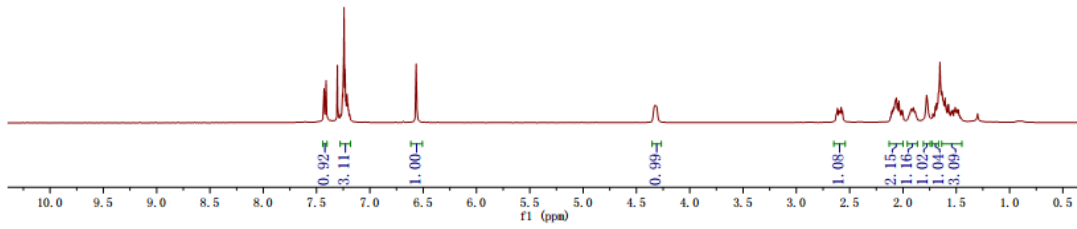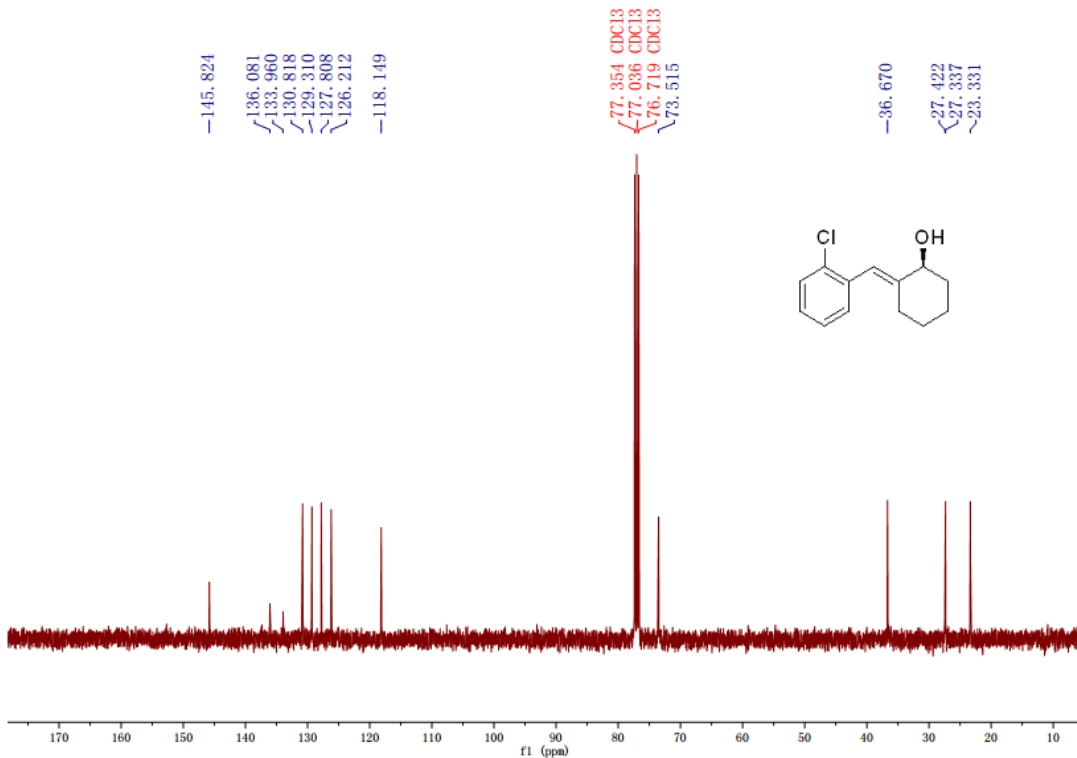

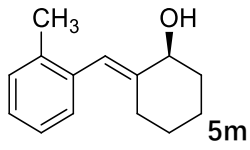

7.238  
 7.226  
 7.215  
 7.203  
 7.195  
 7.189  
 7.180  
 7.172  
 7.152  
 7.143  
 7.133  
 7.121  
 6.514  
 4.331  
 4.312  
 4.302  
 2.585  
 2.575  
 2.571  
 2.560  
 2.552  
 2.539  
 2.526  
 2.293  
 2.091  
 2.082  
 2.072  
 2.050  
 2.044  
 2.020  
 2.010  
 2.000  
 1.986  
 1.976  
 1.927  
 1.922  
 1.913  
 1.905  
 1.897  
 1.888  
 1.881  
 1.670  
 1.661  
 1.652  
 1.630  
 1.607  
 1.594  
 1.576  
 1.558  
 1.544  
 1.507  
 1.494  
 1.478  
 1.468  
 1.455  
 1.445  
 1.435

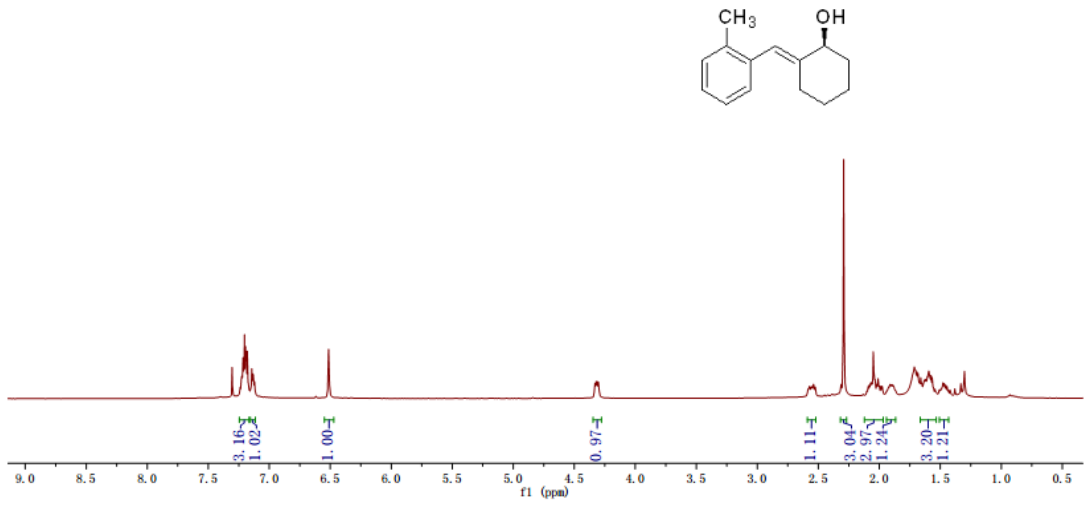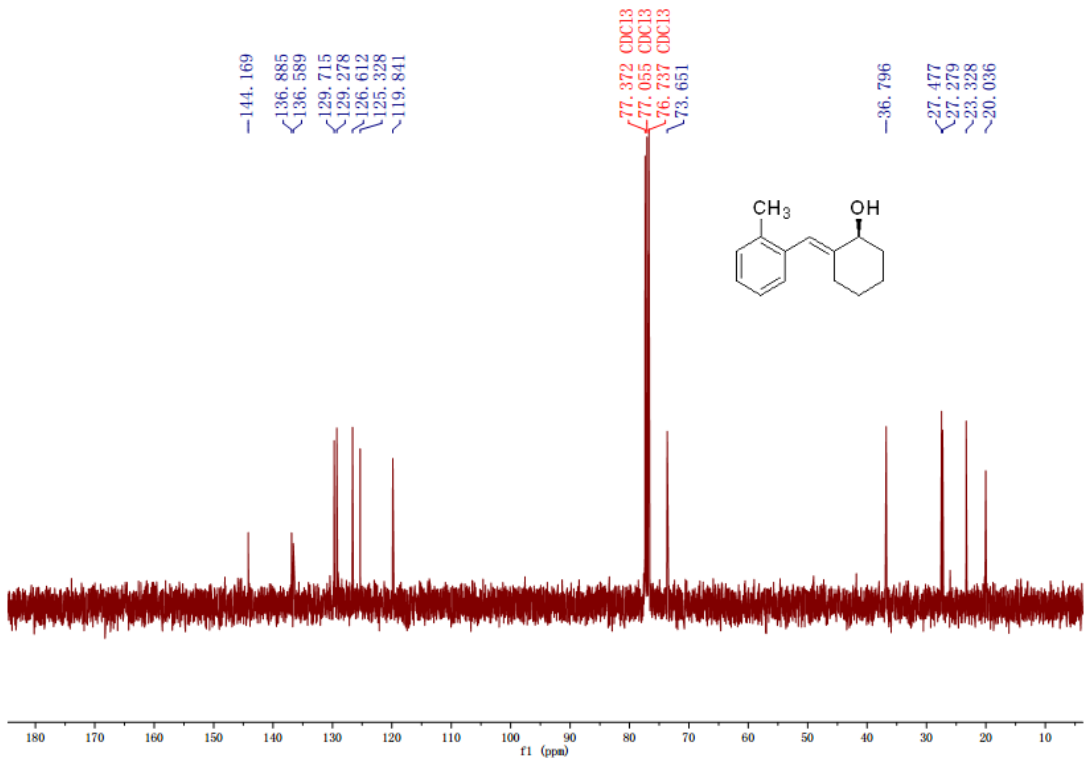

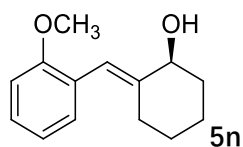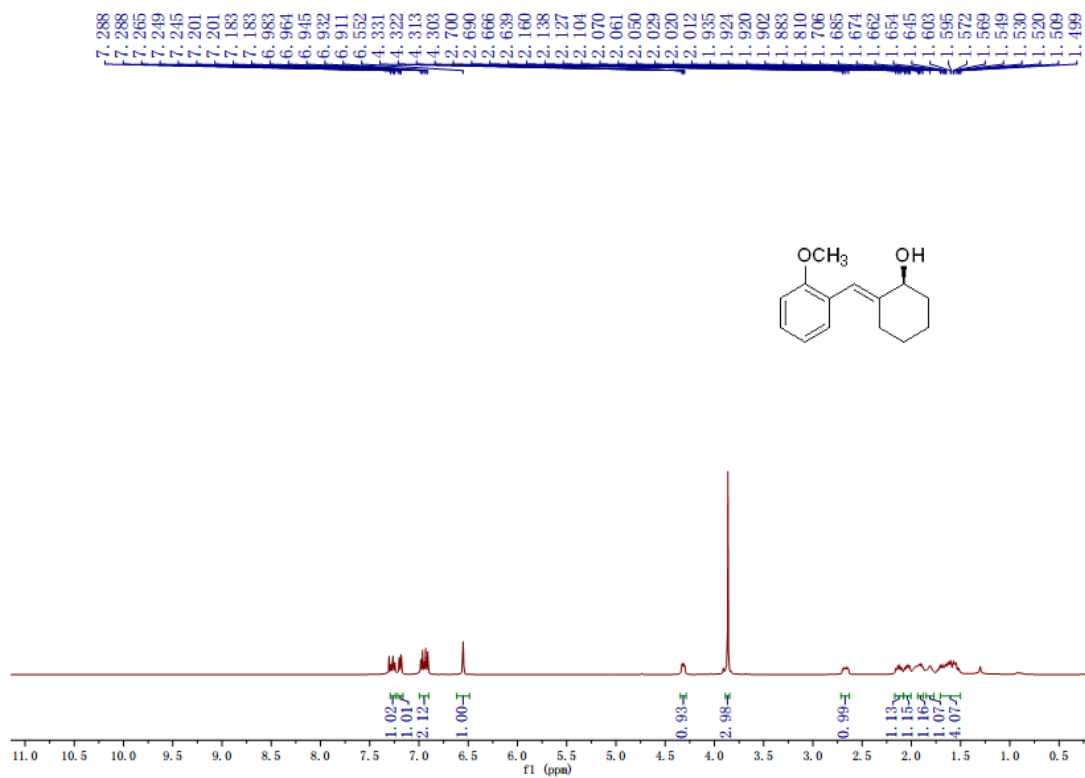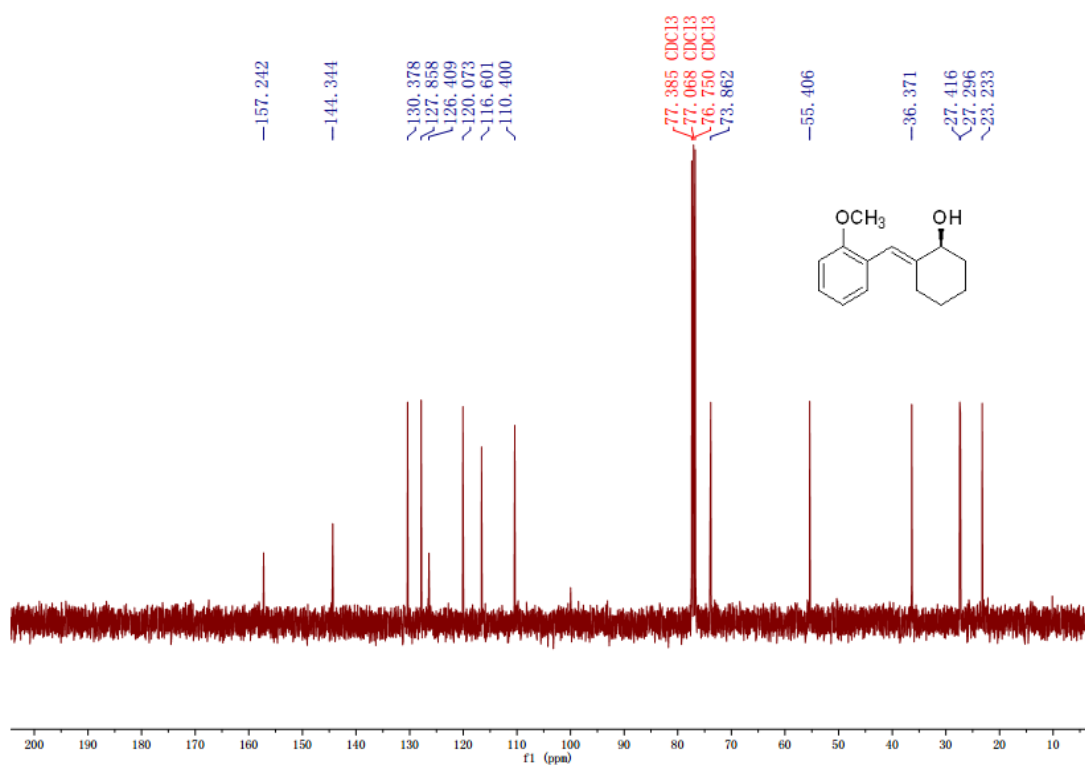

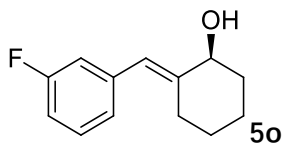

7.342  
7.323  
7.286  
7.044  
7.032  
7.012  
6.968  
6.945  
6.929  
6.535

4.286  
4.276  
4.266  
4.255  
2.795  
2.782  
2.769  
2.761  
2.748  
2.735  
2.154  
2.144  
2.130  
2.120  
2.110  
2.087  
2.061  
2.044  
1.928  
1.911  
1.903  
1.885  
1.732  
1.637  
1.628  
1.608  
1.590  
1.584  
1.576  
1.568  
1.552  
1.531  
1.509  
1.502  
1.478

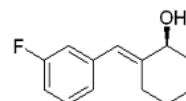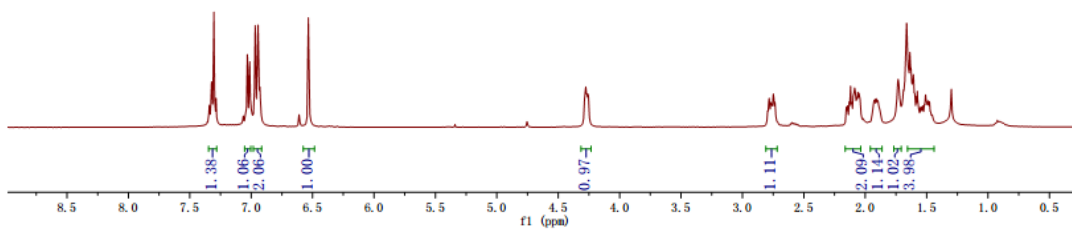

163.909  
161.472

145.563  
140.037  
139.961  
129.547  
129.463  
124.699  
124.670  
119.650  
119.629  
115.755  
115.545  
113.187  
112.977

77.354 CDCl3  
77.037 CDCl3  
76.718 CDCl3  
73.604

36.732  
27.337  
27.158  
23.319

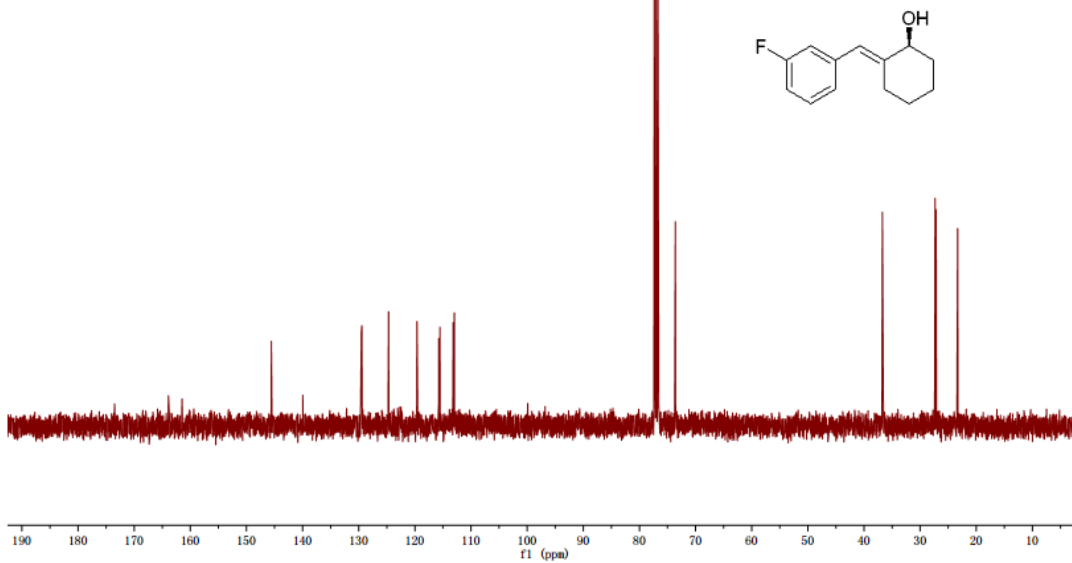

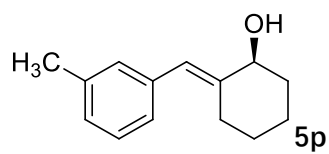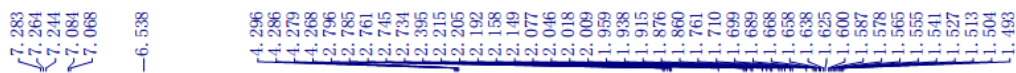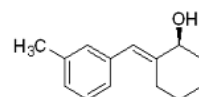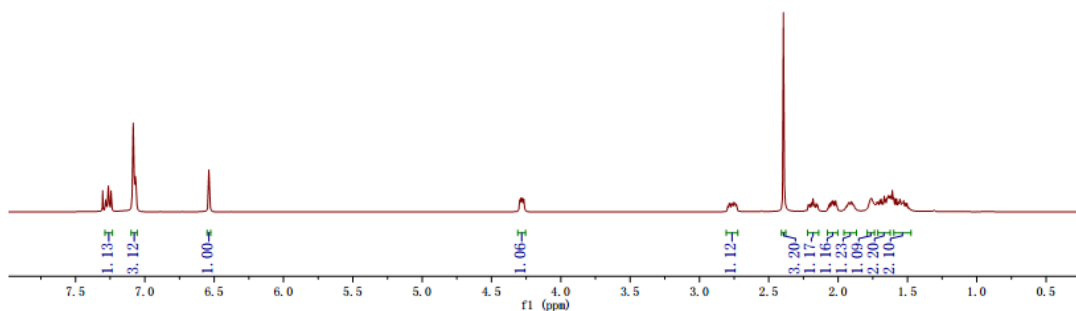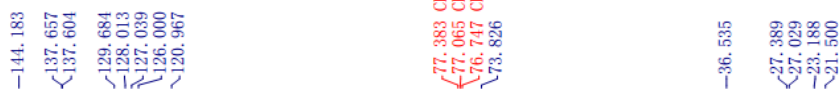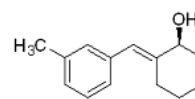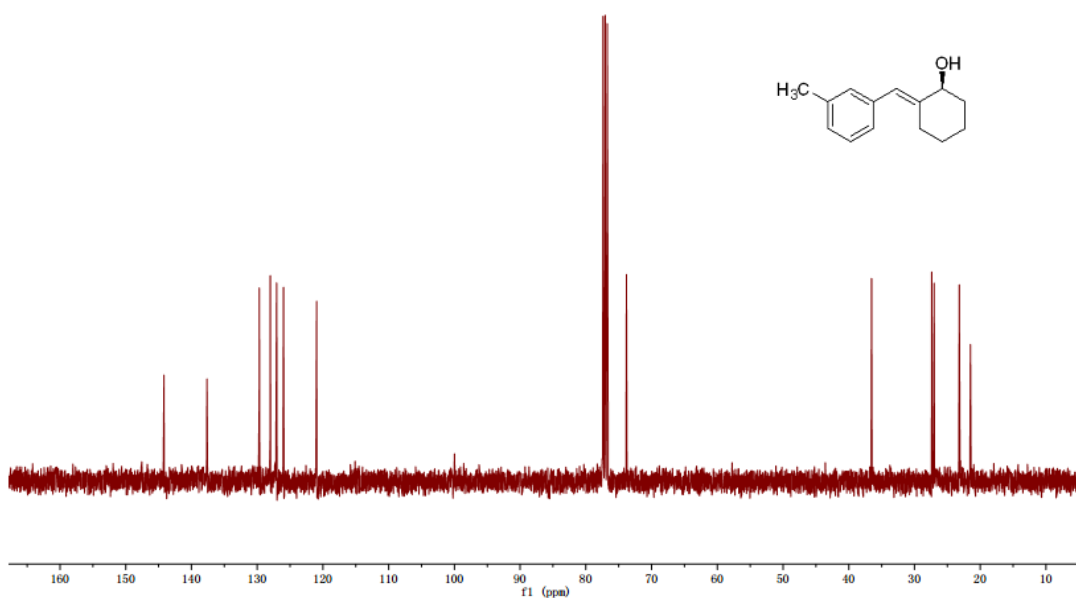

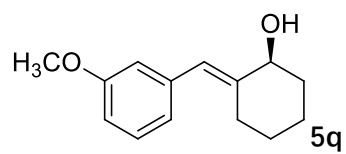

7.282  
 7.261  
 6.868  
 6.849  
 6.821  
 6.806  
 6.512

4.288  
 4.279  
 4.270  
 4.260  
 3.848  
 2.810  
 2.799  
 2.784  
 2.765  
 2.751  
 2.193  
 2.170  
 2.160  
 2.136  
 2.126  
 2.074  
 2.064  
 2.055  
 2.034  
 2.026  
 1.923  
 1.916  
 1.898  
 1.879  
 1.810  
 1.696  
 1.683  
 1.674  
 1.662  
 1.652  
 1.643  
 1.629  
 1.580  
 1.571  
 1.547  
 1.541  
 1.528  
 1.519  
 1.514  
 1.499  
 1.489

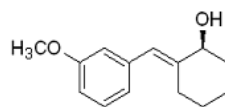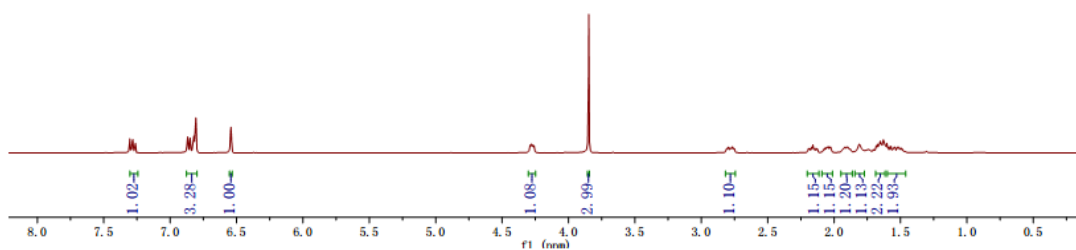

-159.386  
 -144.672  
 -139.134  
 -129.077  
 -121.477  
 -120.655  
 -114.572  
 -111.734  
 77.384 CDCl3  
 77.066 CDCl3  
 76.749 CDCl3  
 73.735  
 -55.194  
 -36.617  
 -27.385  
 -27.166  
 -23.265

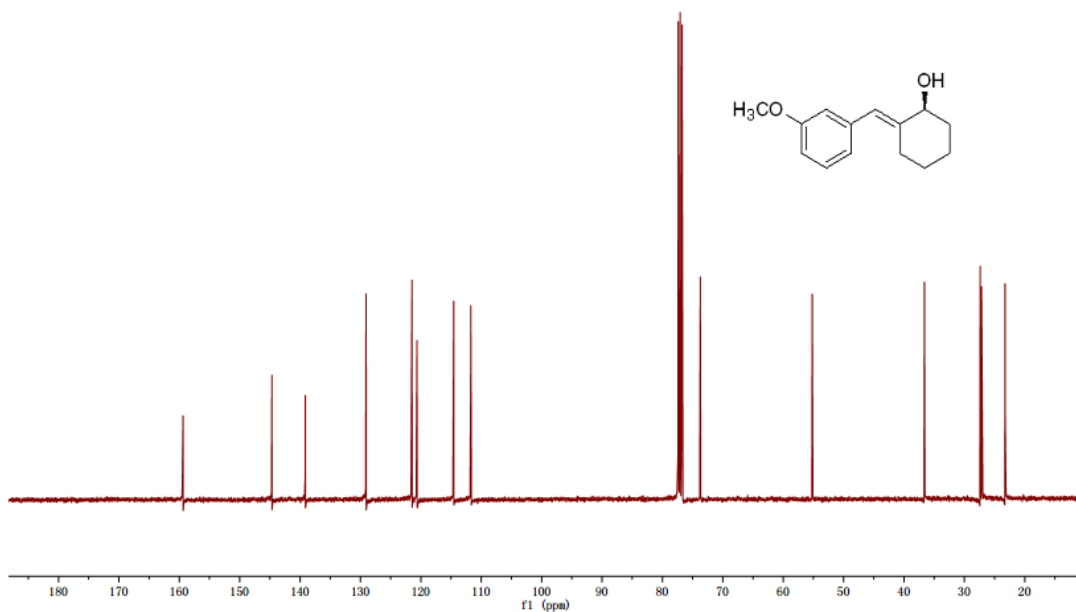

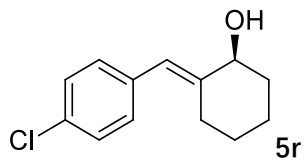

7.328  
 7.307  
 7.175  
 7.154  
 -6.511

4.273  
 4.263  
 4.252  
 4.242  
 2.745  
 2.730  
 2.710  
 2.698  
 2.127  
 2.118  
 2.094  
 2.084  
 2.059  
 2.044  
 2.029  
 1.894  
 1.683  
 1.661  
 1.641  
 1.632  
 1.612  
 1.591  
 1.568  
 1.512  
 1.489  
 1.468  
 1.460  
 1.437

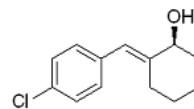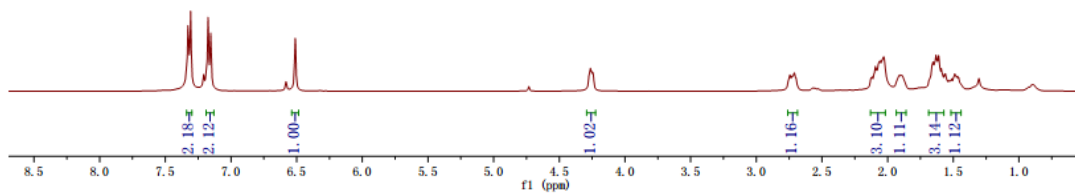

-145.159  
 136.149  
 131.947  
 130.273  
 130.250  
 128.358  
 128.271  
 -119.567

77.417 CDCl3  
 77.099 CDCl3  
 76.782 CDCl3  
 73.615

-36.681  
 27.338  
 27.112  
 23.320

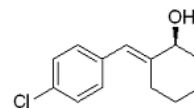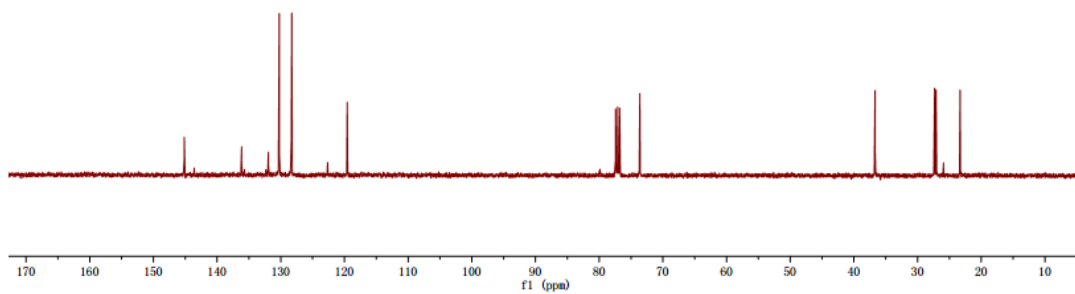



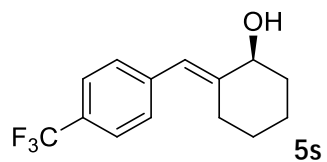

7.624  
7.604  
7.363  
7.343  
6.601

4.295  
4.294  
2.790  
2.778  
2.765  
2.756  
2.743  
2.731  
2.121  
2.109  
2.099  
2.089  
2.078  
2.067  
1.989  
1.982  
1.923  
1.916  
1.909  
1.704  
1.696  
1.689  
1.662  
1.586  
1.562  
1.554  
1.532  
1.523  
1.509  
1.471

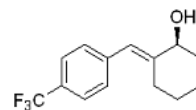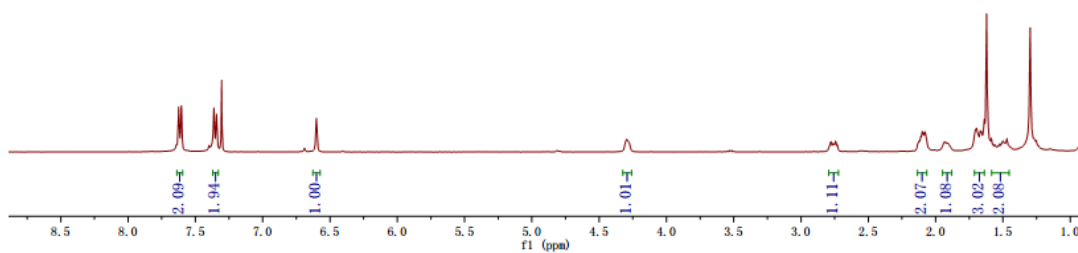

146.469  
144.773  
141.486  
129.190  
129.157  
125.166  
125.128  
125.067  
125.029  
122.312  
119.395

77.354 CDC13  
77.092 CDC13  
76.720 CDC13  
73.515

36.811

27.365  
27.265  
23.401

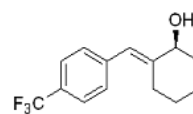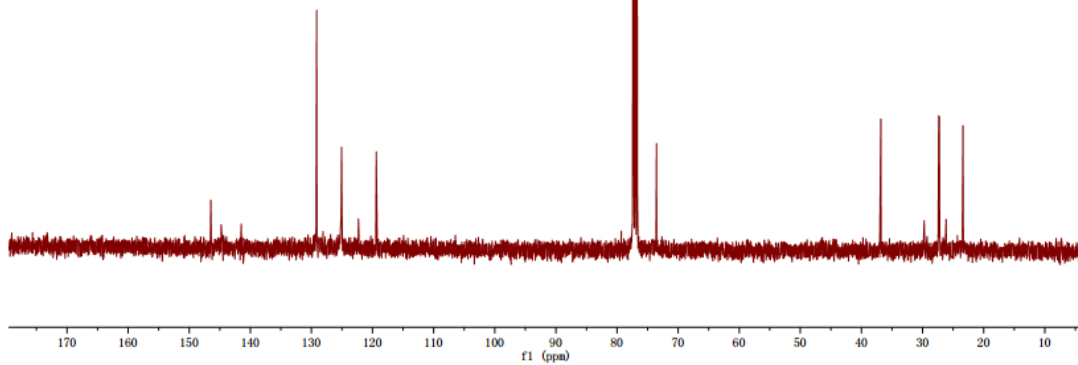

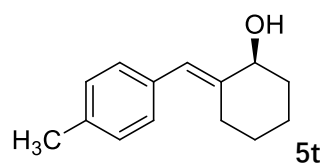

7.199  
 7.177  
 7.174  
 7.153  
 6.533  
 4.296  
 4.287  
 4.277  
 4.267  
 2.791  
 2.780  
 2.763  
 2.746  
 2.730  
 2.393  
 2.220  
 2.210  
 2.187  
 2.163  
 2.153  
 2.061  
 2.051  
 2.040  
 2.011  
 2.004  
 1.957  
 1.937  
 1.919  
 1.903  
 1.873  
 1.780  
 1.700  
 1.691  
 1.680  
 1.670  
 1.661  
 1.649  
 1.640  
 1.631  
 1.616  
 1.585  
 1.576  
 1.562  
 1.553  
 1.542  
 1.537  
 1.526  
 1.513  
 1.503  
 1.492

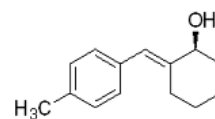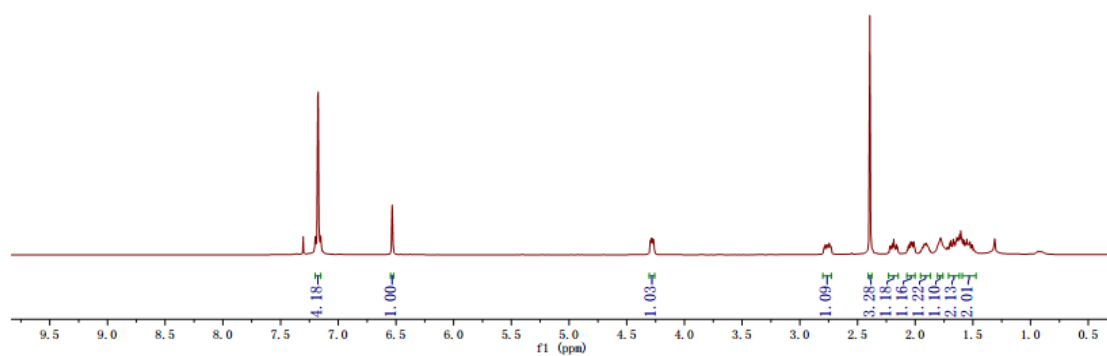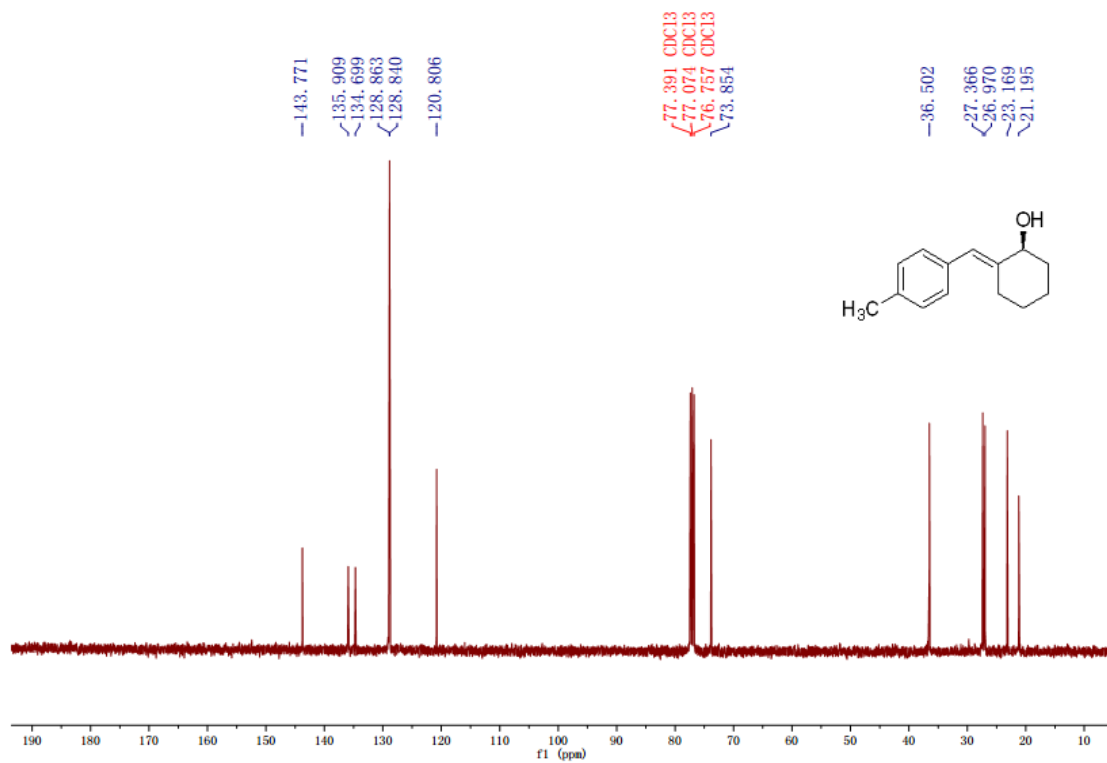

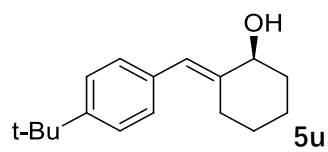

7.418  
7.398  
7.238  
7.218  
-6.546

4.303  
4.294  
4.285  
4.275  
2.826  
2.816  
2.799  
2.782  
2.768  
2.552  
2.243  
2.230  
2.219  
2.196  
2.187  
2.066  
2.057  
2.046  
2.036  
2.026  
2.017  
1.968  
1.928  
1.915  
1.897  
1.873  
1.733  
1.712  
1.693  
1.682  
1.674  
1.655  
1.586  
1.572  
1.546  
1.533  
1.523  
1.390

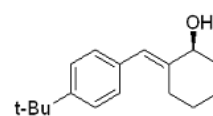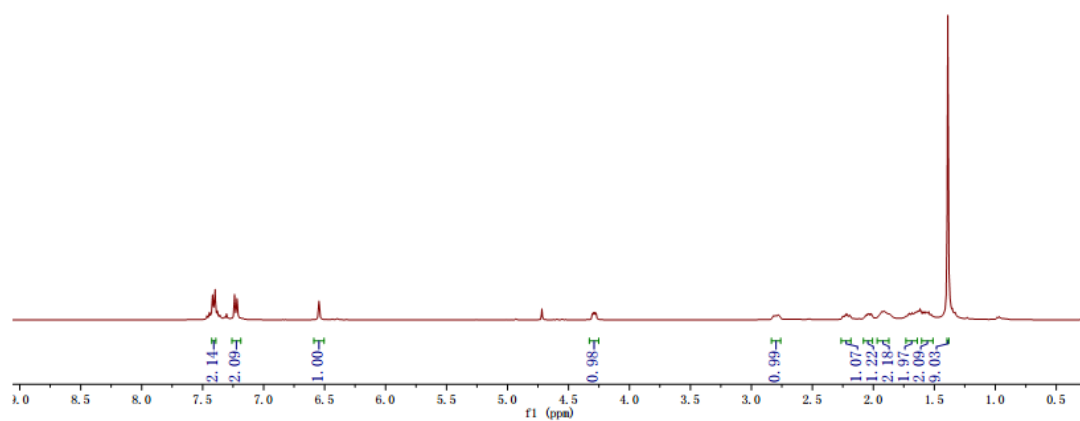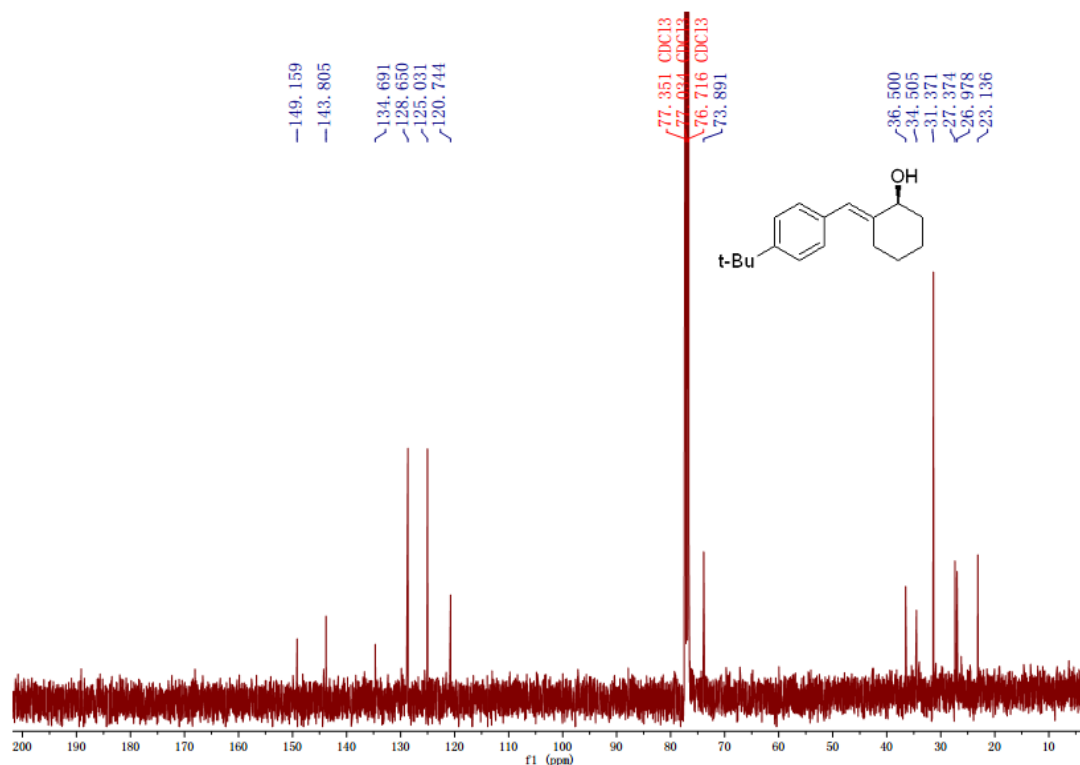

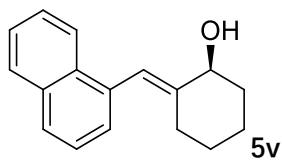

8.055  
8.040  
8.031  
7.911  
7.903  
7.894  
7.888  
7.815  
7.795  
7.540  
7.531  
7.526  
7.516  
7.508  
7.490  
7.470  
7.331  
7.314  
6.958  
4.446  
4.435  
4.424  
4.413  
2.590  
2.578  
2.568  
2.557  
2.544  
2.170  
2.160  
2.148  
2.138  
2.130  
2.034  
2.019  
2.010  
2.000  
1.974  
1.939  
1.922  
1.913  
1.829  
1.761  
1.752  
1.739  
1.730  
1.721  
1.626  
1.617  
1.609  
1.599  
1.591  
1.569  
1.477  
1.468  
1.459  
1.444  
1.435

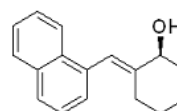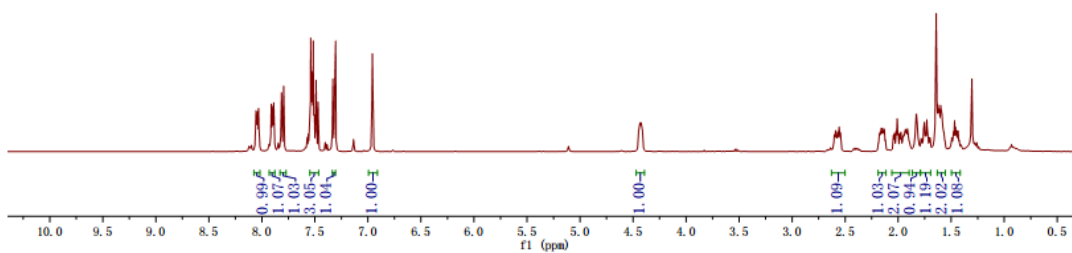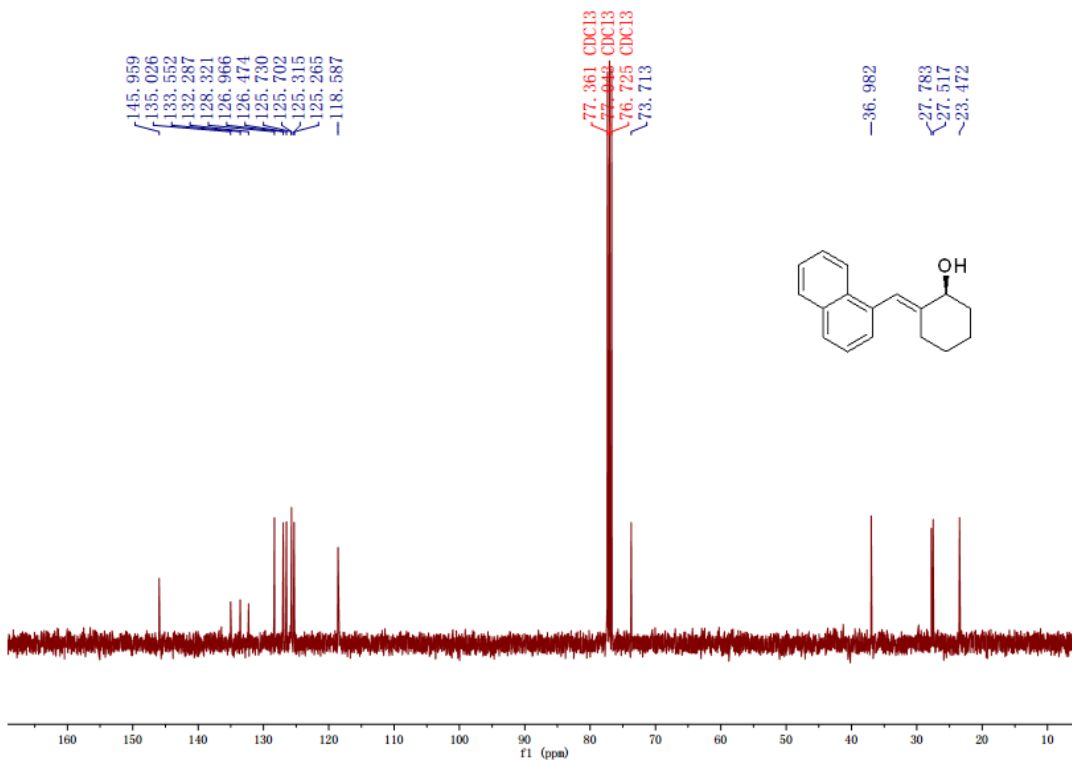

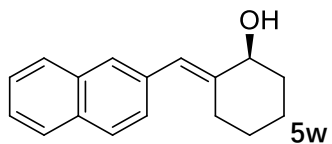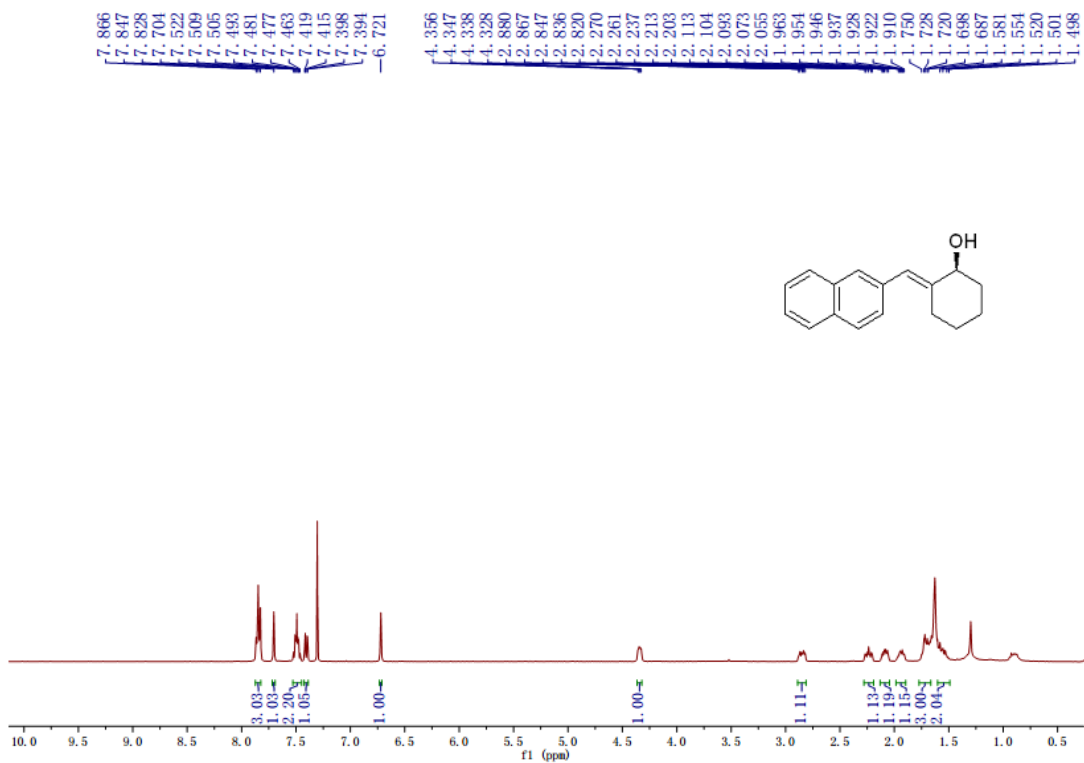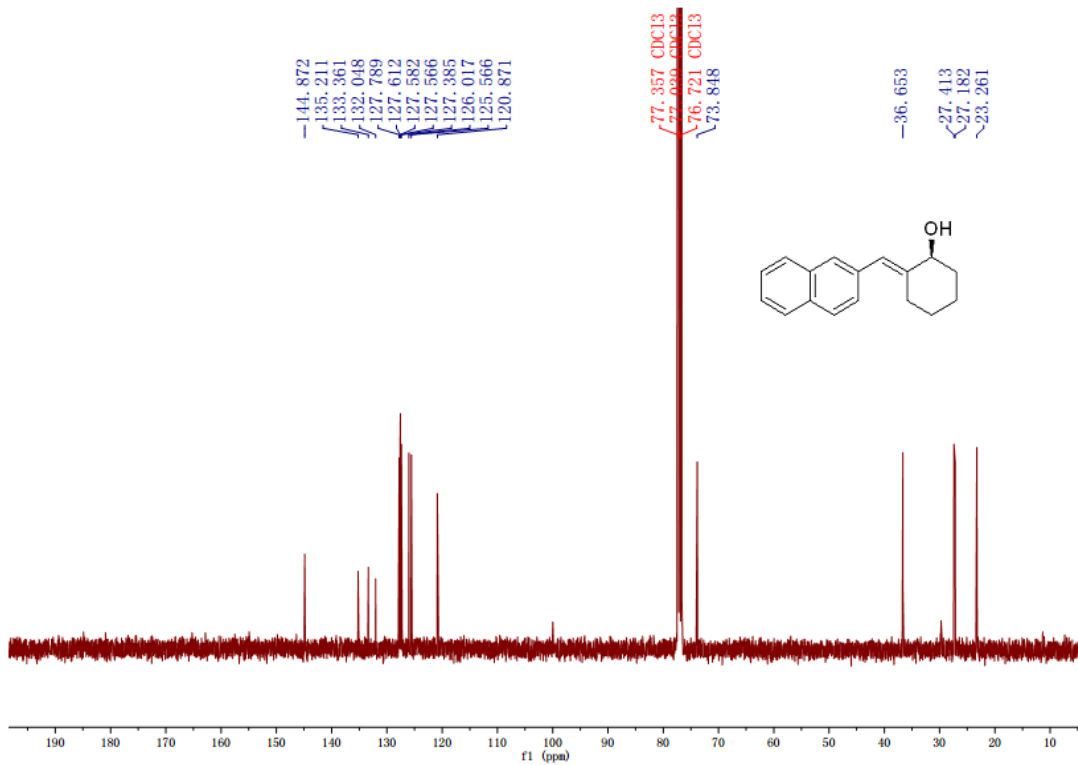

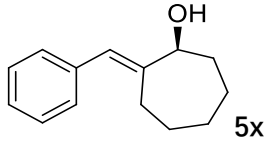

7.400  
 7.396  
 7.381  
 7.368  
 7.363  
 7.342  
 7.339  
 7.321  
 7.290  
 7.286  
 7.283  
 7.269  
 7.263  
 7.251  
 7.251  
 6.622  
 4.450  
 4.434  
 4.429  
 4.414  
 2.519  
 2.507  
 2.495  
 2.487  
 2.182  
 2.168  
 2.162  
 2.150  
 1.893  
 1.878  
 1.866  
 1.855  
 1.796  
 1.779  
 1.775  
 1.765  
 1.744  
 1.744  
 1.728  
 1.689  
 1.683  
 1.670  
 1.664  
 1.649  
 1.643  
 1.627  
 1.617  
 1.606  
 1.597  
 1.584  
 1.554  
 1.538  
 1.534  
 1.529  
 1.512  
 1.428  
 1.403  
 1.398

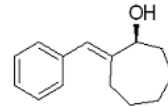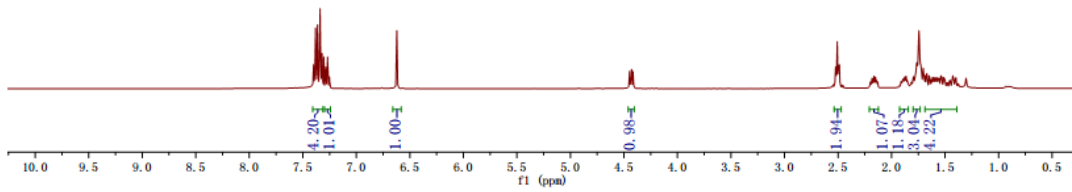

-146.432  
 -137.625  
 128.694  
 128.223  
 126.873  
 126.508

77.387 CDCl3  
 77.085  
 77.070 CDCl3  
 76.752 CDCl3

-36.662  
 29.189  
 28.128  
 26.605  
 23.915

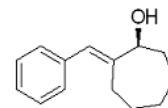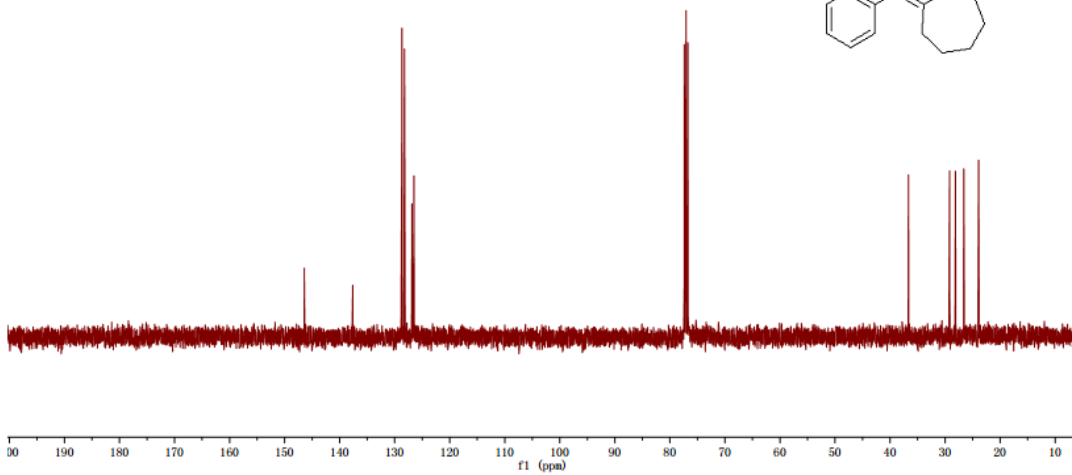

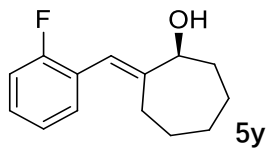

7.334  
 7.315  
 7.304  
 7.285  
 7.265  
 7.247  
 7.233  
 7.157  
 7.138  
 7.120  
 7.107  
 7.083  
 7.061  
 6.626

4.488  
 4.475  
 4.468  
 4.455

2.442  
 2.424  
 2.410  
 2.399  
 2.184  
 2.150  
 2.137  
 2.131  
 2.117  
 2.111  
 1.799  
 1.770  
 1.750  
 1.730  
 1.709  
 1.696  
 1.555  
 1.517  
 1.495  
 1.473  
 1.447  
 1.422  
 1.402

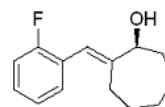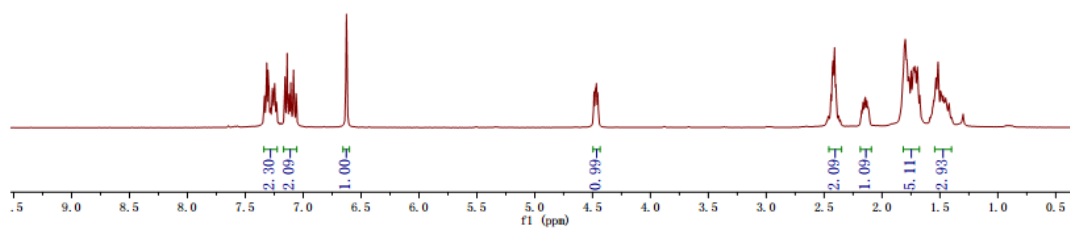

161.433

158.984

148.850

130.288

130.254

128.318

128.236

125.481

125.335

123.625

123.588

119.117

119.084

115.451

115.228

77.366 CDCl3

77.049 CDCl3

76.731 CDCl3

76.535

36.670

28.875

27.841

26.966

24.049

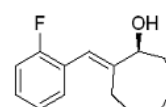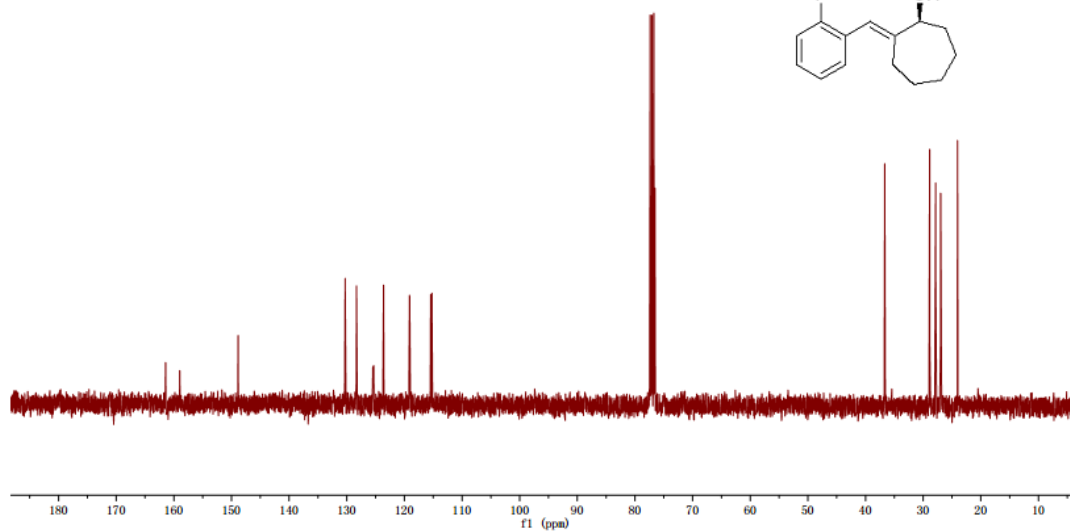

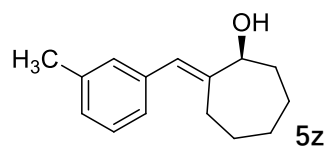

7.289  
 7.283  
 7.269  
 7.254  
 7.250  
 7.150  
 7.134  
 7.096  
 7.078  
 6.590  
 4.440  
 4.426  
 4.420  
 4.406  
 2.520  
 2.507  
 2.502  
 2.492  
 2.481  
 2.396  
 2.173  
 2.167  
 2.159  
 2.154  
 2.147  
 2.140  
 2.134  
 2.125  
 2.119  
 1.904  
 1.887  
 1.873  
 1.861  
 1.847  
 1.795  
 1.772  
 1.762  
 1.740  
 1.721  
 1.705  
 1.697  
 1.647  
 1.614  
 1.610  
 1.602  
 1.589  
 1.580  
 1.568  
 1.560  
 1.549  
 1.534  
 1.512  
 1.502  
 1.484  
 1.454  
 1.437  
 1.424  
 1.397

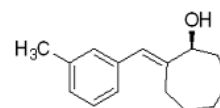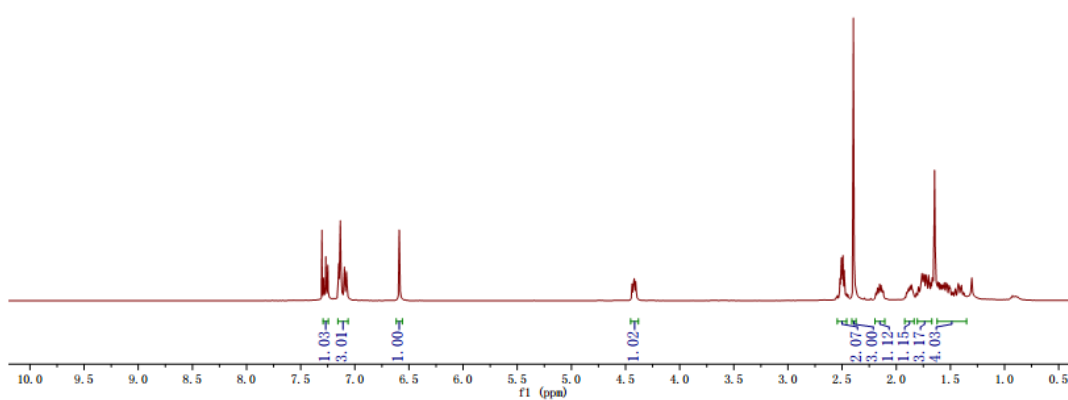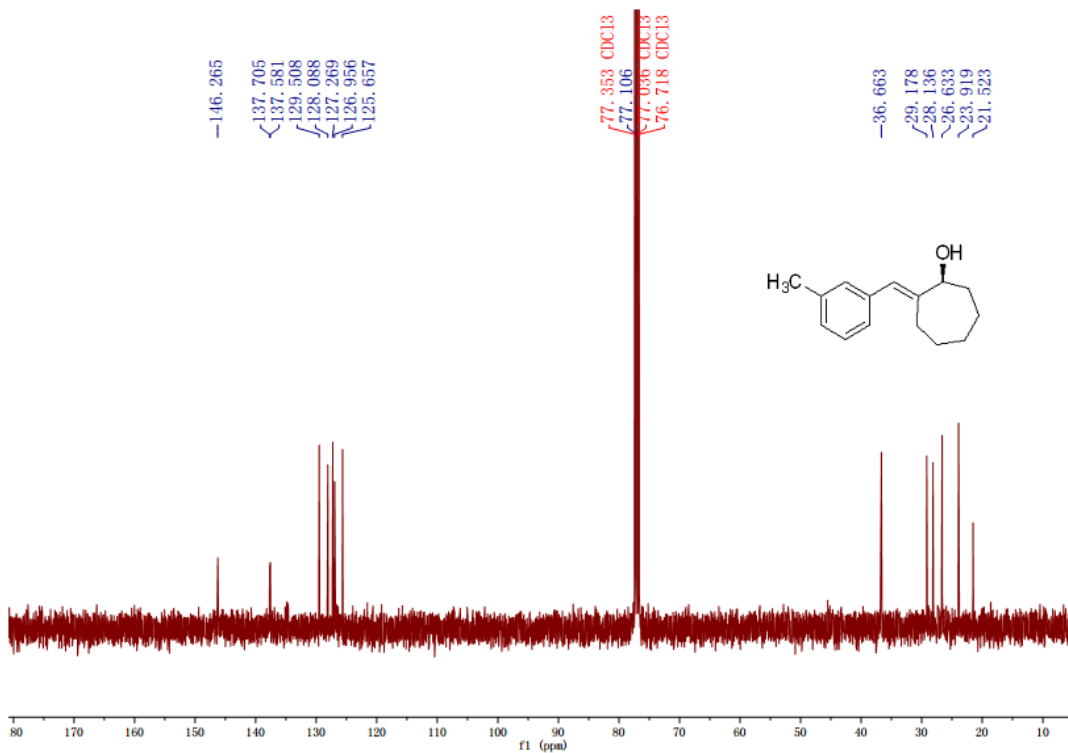



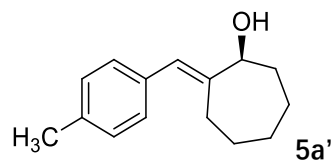

7.244  
 7.224  
 7.197  
 7.177  
 6.577  
 4.436  
 4.422  
 4.416  
 4.402  
 2.561  
 2.509  
 2.497  
 2.487  
 2.475  
 2.451  
 2.391  
 2.193  
 2.170  
 2.158  
 2.143  
 2.137  
 2.124  
 1.925  
 1.911  
 1.894  
 1.883  
 1.867  
 1.853  
 1.809  
 1.790  
 1.761  
 1.741  
 1.718  
 1.698  
 1.655  
 1.634  
 1.598  
 1.585  
 1.576  
 1.563  
 1.552  
 1.533  
 1.524  
 1.507  
 1.497  
 1.445  
 1.440  
 1.420  
 1.415  
 1.410  
 1.395  
 1.385

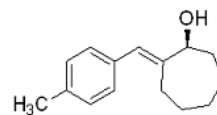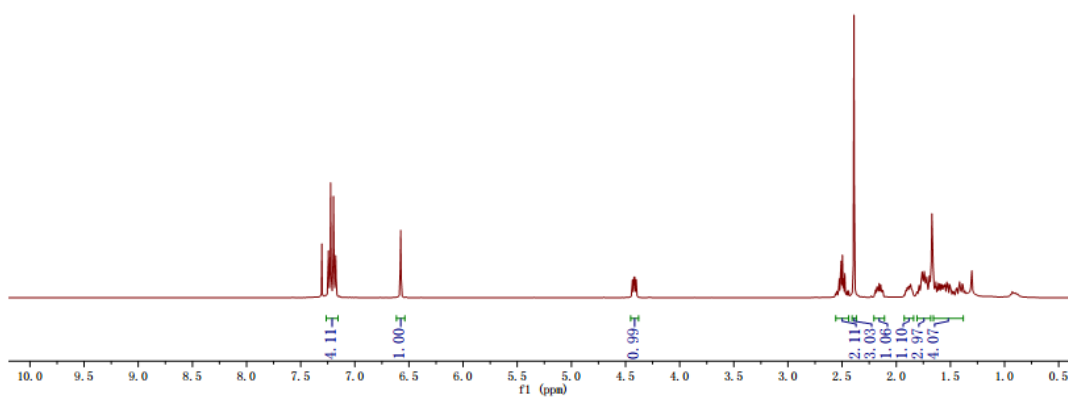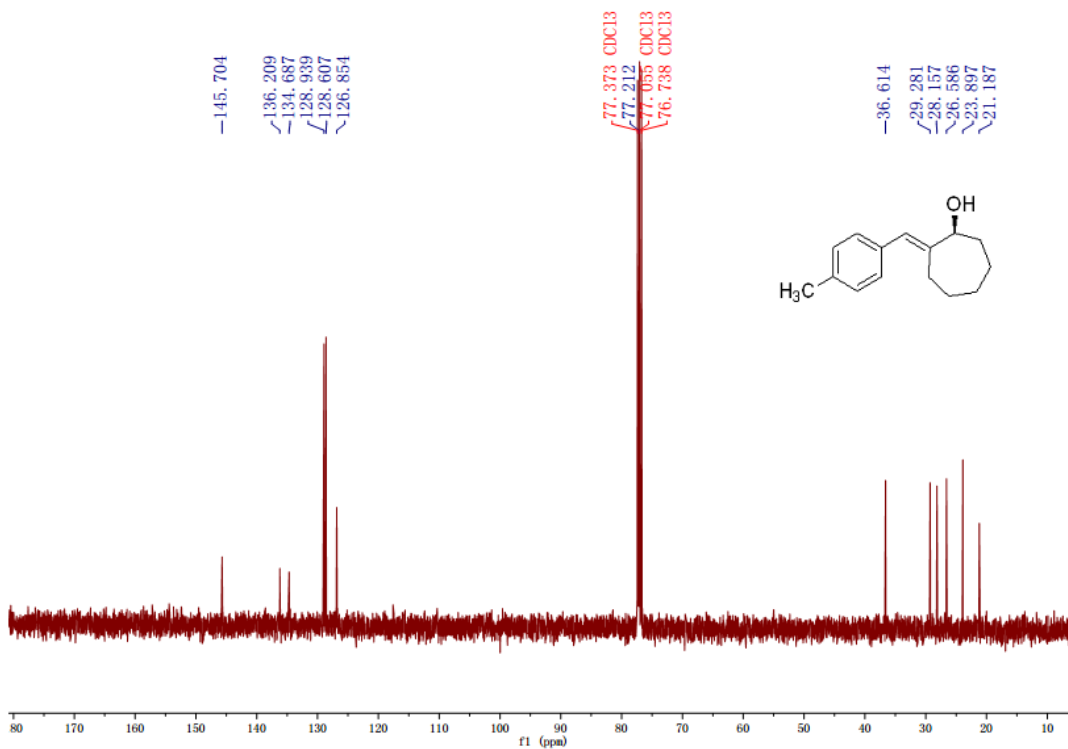

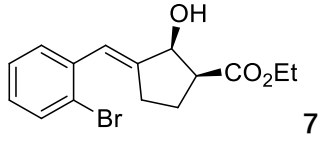

7.621, 7.618, 7.601, 7.598, 7.446, 7.442, 7.426, 7.423, 7.332, 7.330, 7.314, 7.295, 7.293, 7.146, 7.142, 7.127, 7.123, 7.108, 7.101, 6.877, 4.824, 4.812, 4.798, 4.271, 4.256, 4.238, 4.221, 4.221, 3.152, 3.138, 2.988, 2.975, 2.969, 2.955, 2.948, 2.935, 2.816, 2.805, 2.508, 2.501, 2.486, 2.480, 2.464, 2.458, 2.309, 2.299, 2.291, 2.277, 2.259, 2.255, 2.114, 2.106, 2.094, 2.085, 2.073, 2.062, 1.349, 1.331, 1.313

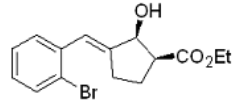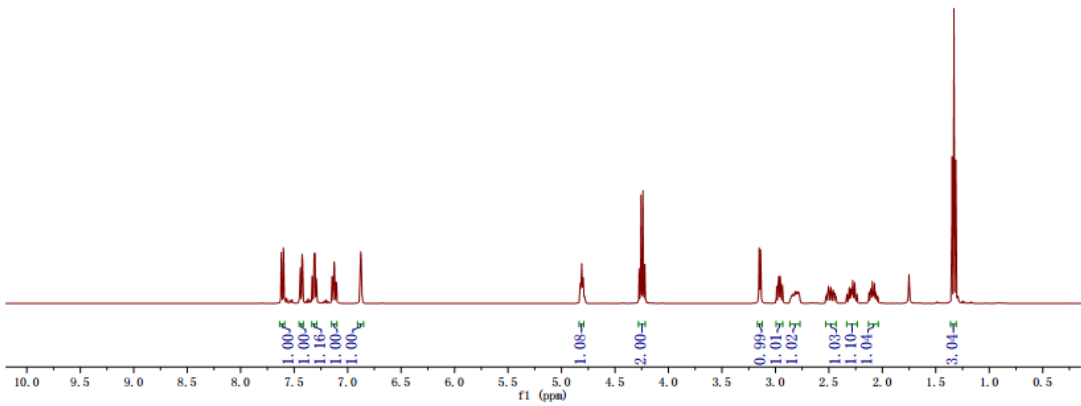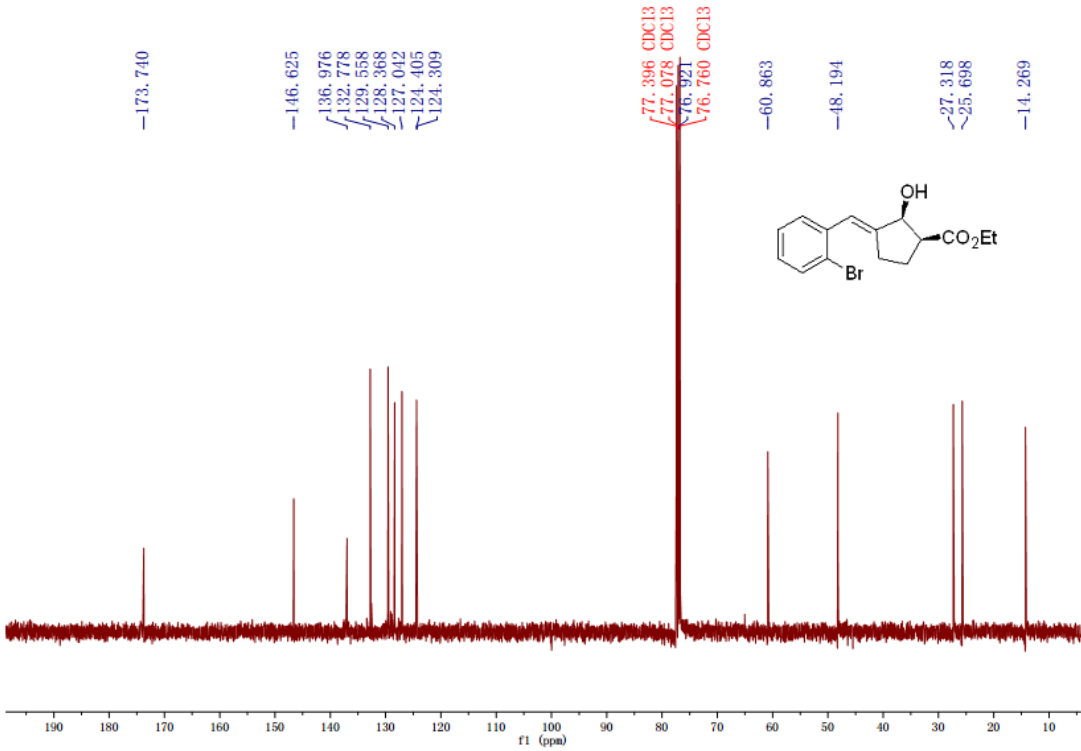

## 9. HPLC Spectra of the Products

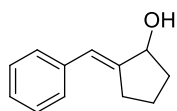

Racemate-3a

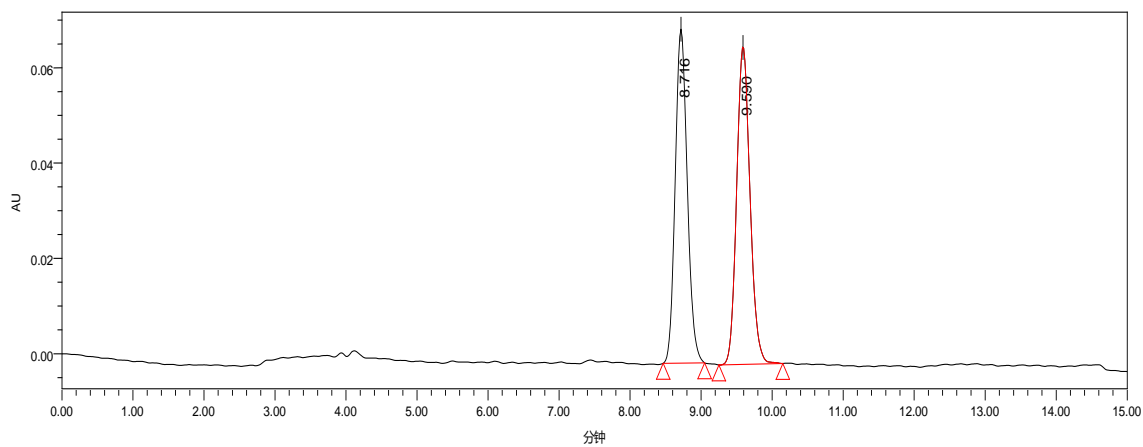

| Peak | Ret Time[min] | Area   | % Area | Height |
|------|---------------|--------|--------|--------|
| 1    | 8.716         | 820723 | 49.19  | 69615  |
| 2    | 9.590         | 847580 | 50.81  | 68828  |

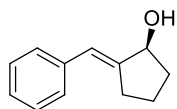

(S)-3a

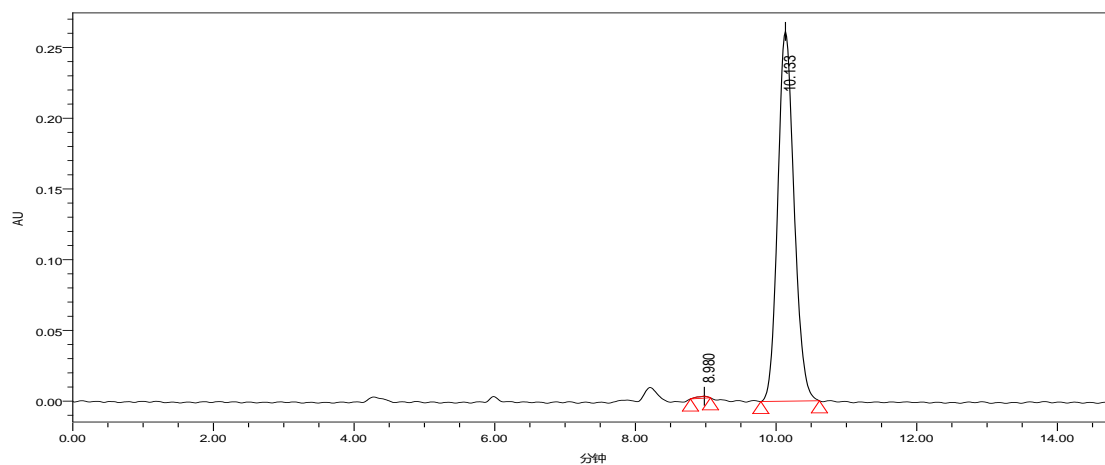

| Peak | Ret Time[min] | Area    | % Area | Height |
|------|---------------|---------|--------|--------|
| 1    | 8.980         | 15370   | 0.36   | 1389   |
| 2    | 10.133        | 4226813 | 99.64  | 261351 |

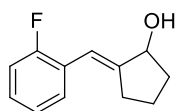

**Racemate-3b**

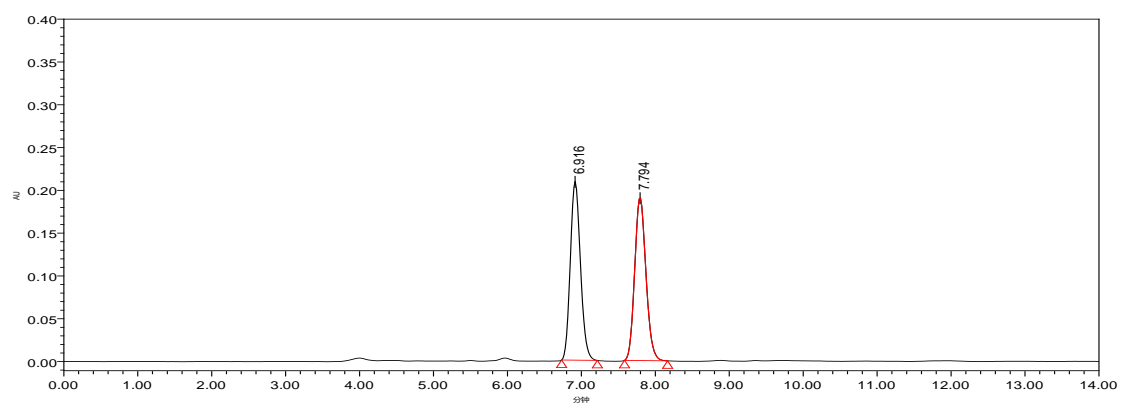

| Peak | Ret Time[min] | Area    | % Area | Height |
|------|---------------|---------|--------|--------|
| 1    | 6.916         | 2010045 | 49.68  | 209293 |
| 2    | 7.794         | 2036130 | 50.32  | 191261 |

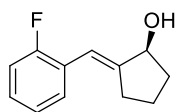

**(S)-3b**

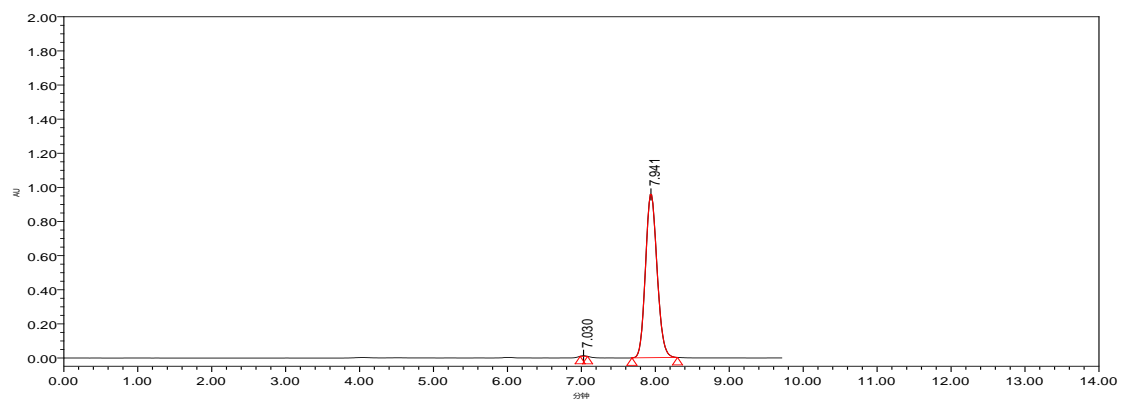

| Peak | Ret Time[min] | Area     | % Area | Height |
|------|---------------|----------|--------|--------|
| 1    | 7.030         | 13360    | 0.13   | 3524   |
| 2    | 7.941         | 10458194 | 99.87  | 963311 |

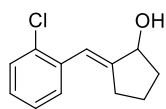

Racemate-3c

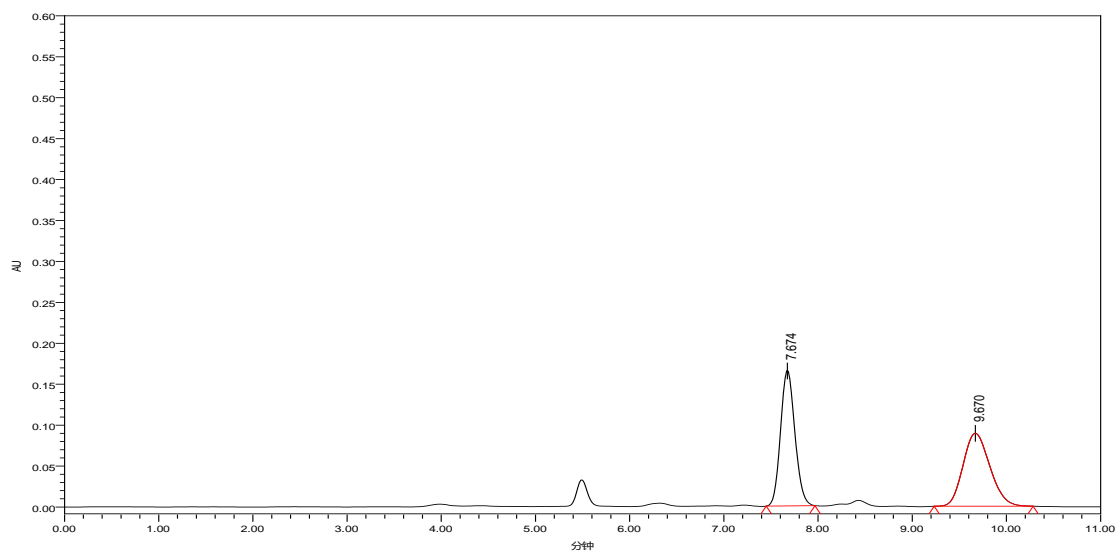

| Peak | Ret Time[min] | Area    | % Area | Height |
|------|---------------|---------|--------|--------|
| 1    | 7.674         | 1752115 | 49.86  | 165955 |
| 2    | 9.670         | 1762096 | 50.14  | 89144  |

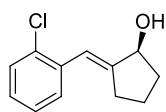

(S)-3c

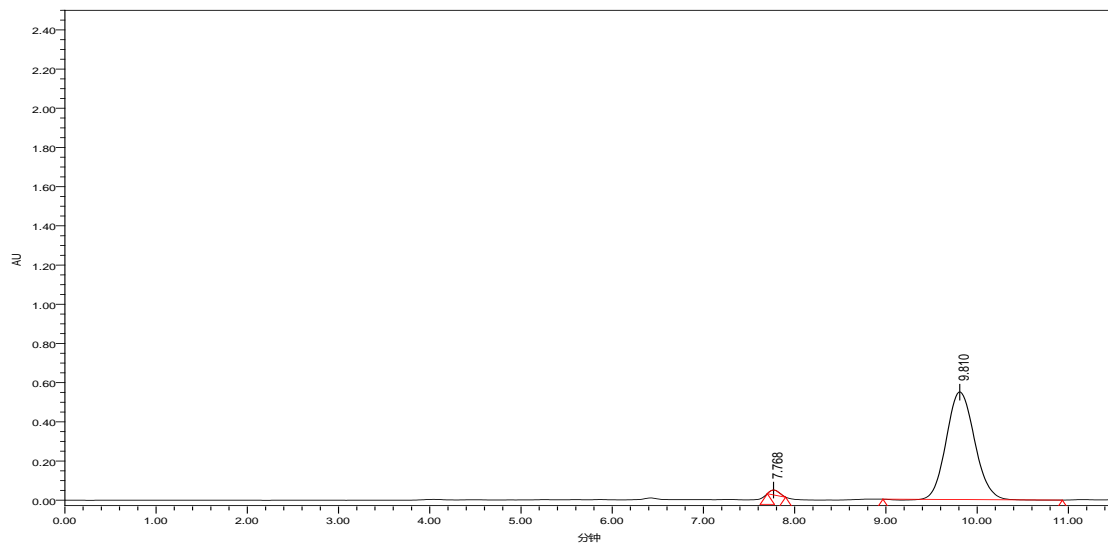

| Peak | Ret Time[min] | Area     | % Area | Height |
|------|---------------|----------|--------|--------|
| 1    | 7.768         | 171865   | 1.42   | 24449  |
| 2    | 9.810         | 11910578 | 98.58  | 549242 |

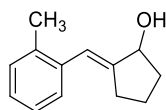

Racemate-3d

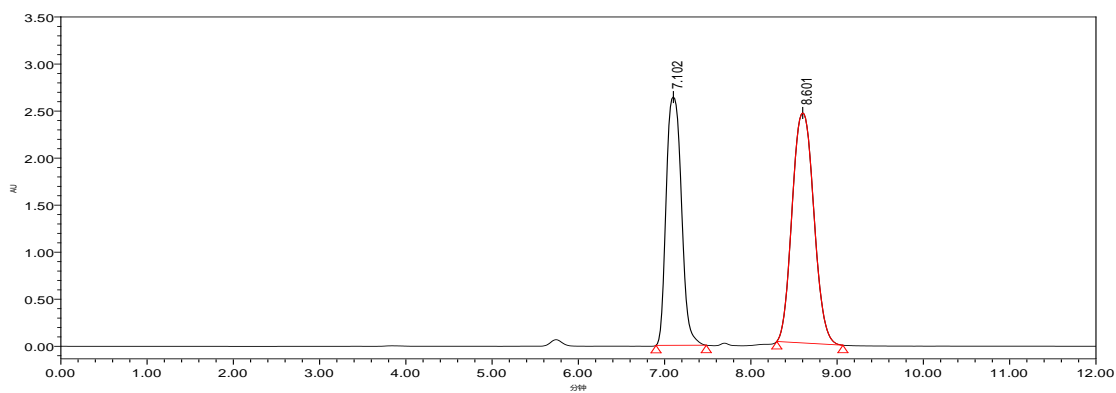

| Peak | Ret Time[min] | Area     | % Area | Height  |
|------|---------------|----------|--------|---------|
| 1    | 7.102         | 36898503 | 49.01  | 2649203 |
| 2    | 8.601         | 38389199 | 50.99  | 2444270 |

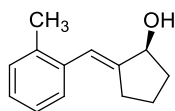

(S)-3d

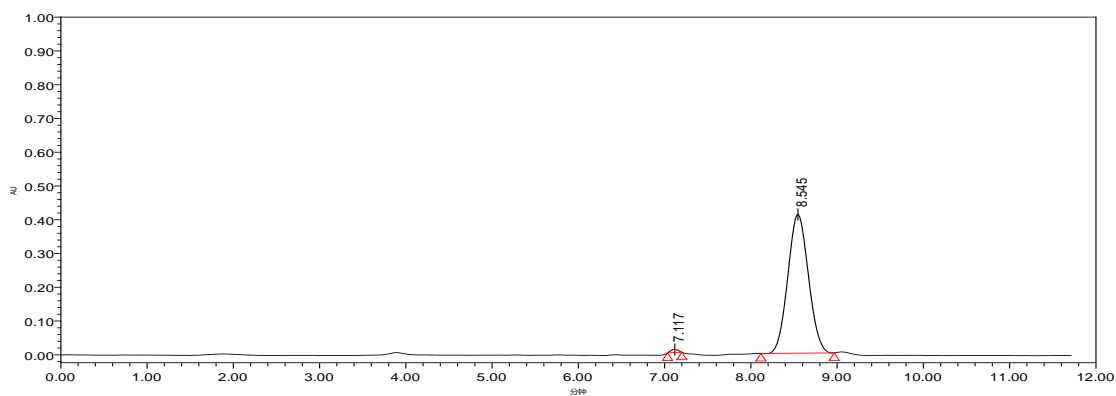

| Peak | Ret Time[min] | Area    | % Area | Height |
|------|---------------|---------|--------|--------|
| 1    | 7.117         | 56904   | 0.83   | 9355   |
| 2    | 8.545         | 6825985 | 99.17  | 411776 |

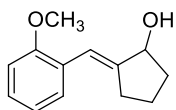

Racemate-3e

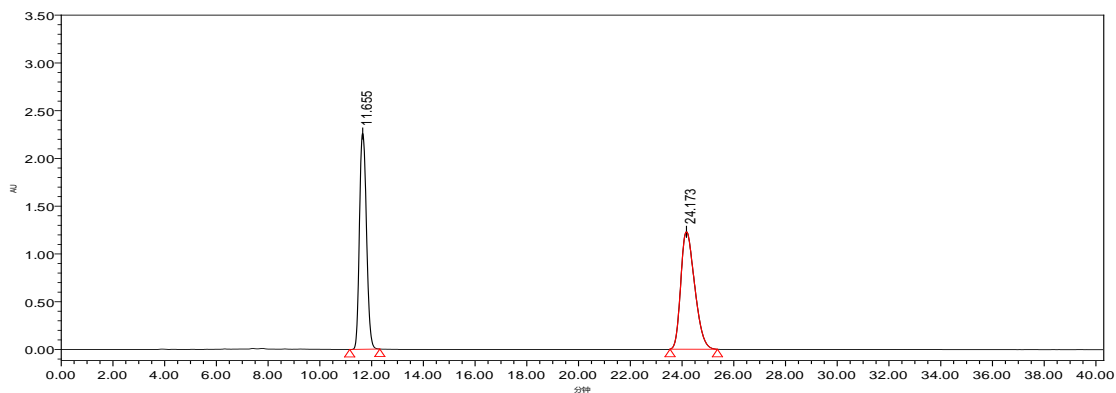

| Peak | Ret Time[min] | Area     | % Area | Height  |
|------|---------------|----------|--------|---------|
| 1    | 11.655        | 44219677 | 49.88  | 2260210 |
| 2    | 24.173        | 44432443 | 50.12  | 1232180 |

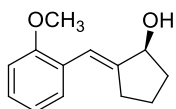

(S)-3e

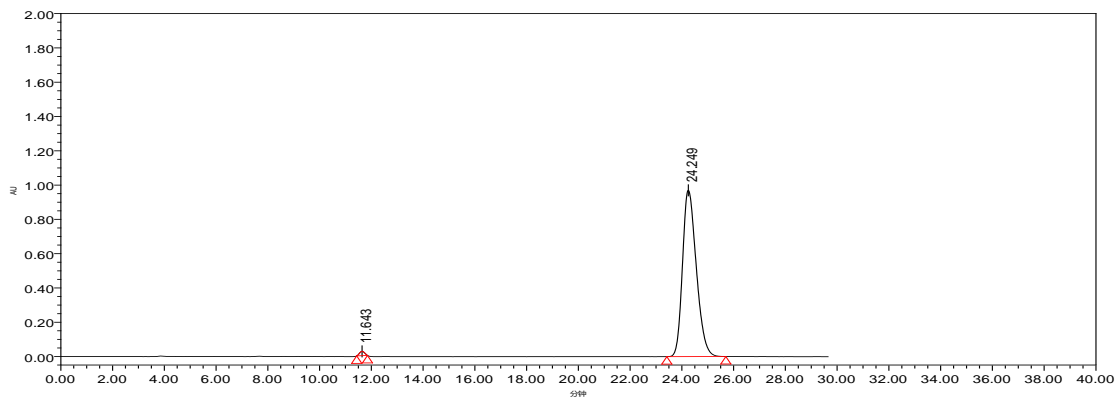

| Peak | Ret Time[min] | Area     | % Area | Height |
|------|---------------|----------|--------|--------|
| 1    | 11.643        | 345331   | 0.95   | 25251  |
| 2    | 24.249        | 35904609 | 99.05  | 970287 |

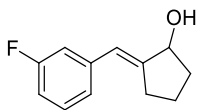

Racemate-3f

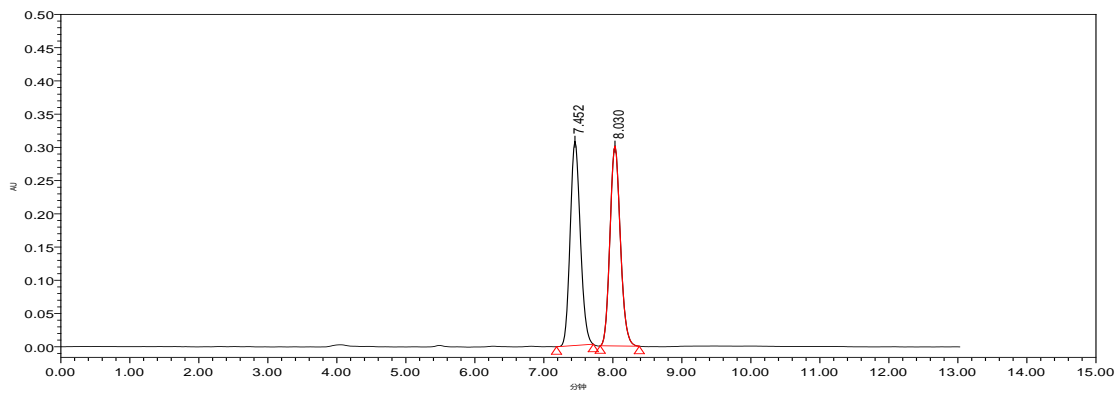

| Peak | Ret Time[min] | Area    | % Area | Height |
|------|---------------|---------|--------|--------|
| 1    | 7.452         | 3154929 | 50.02  | 307742 |
| 2    | 8.030         | 3153036 | 49.98  | 301033 |

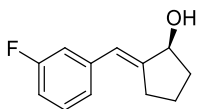

(S)-3f

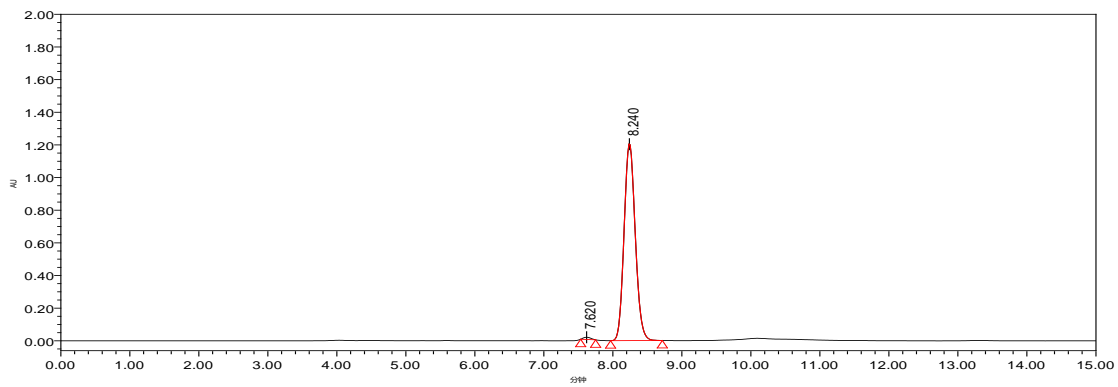

| Peak | Ret Time[min] | Area     | % Area | Height  |
|------|---------------|----------|--------|---------|
| 1    | 7.620         | 101268   | 0.74   | 13723   |
| 2    | 8.240         | 13587456 | 99.26  | 1210308 |



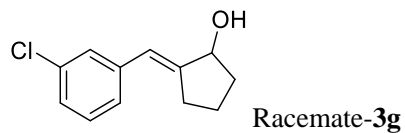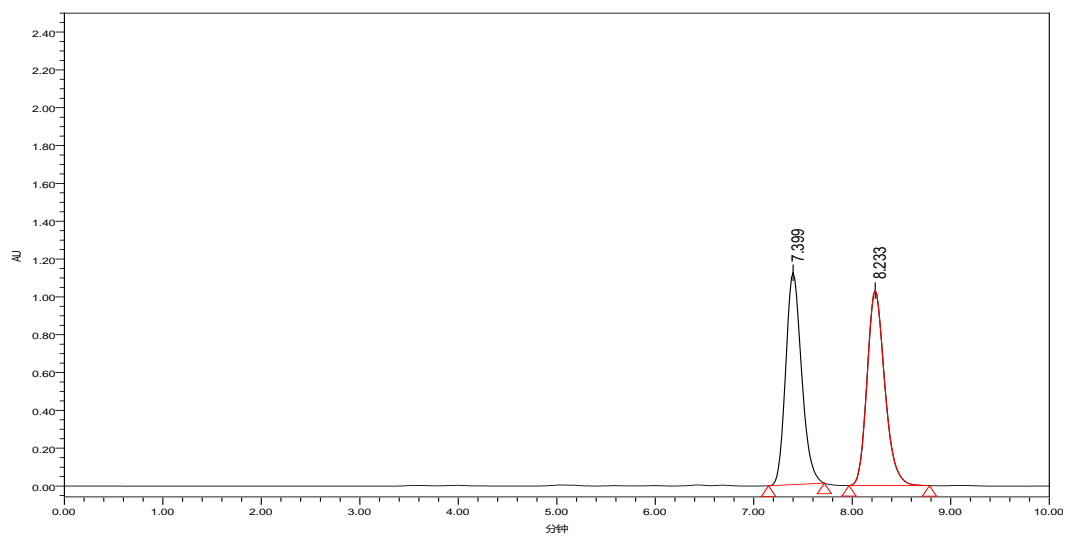

| Peak | Ret Time[min] | Area     | % Area | Height  |
|------|---------------|----------|--------|---------|
| 1    | 7.399         | 12546515 | 49.41  | 1120741 |
| 2    | 8.233         | 12848416 | 50.59  | 1030973 |

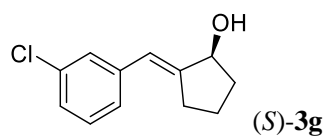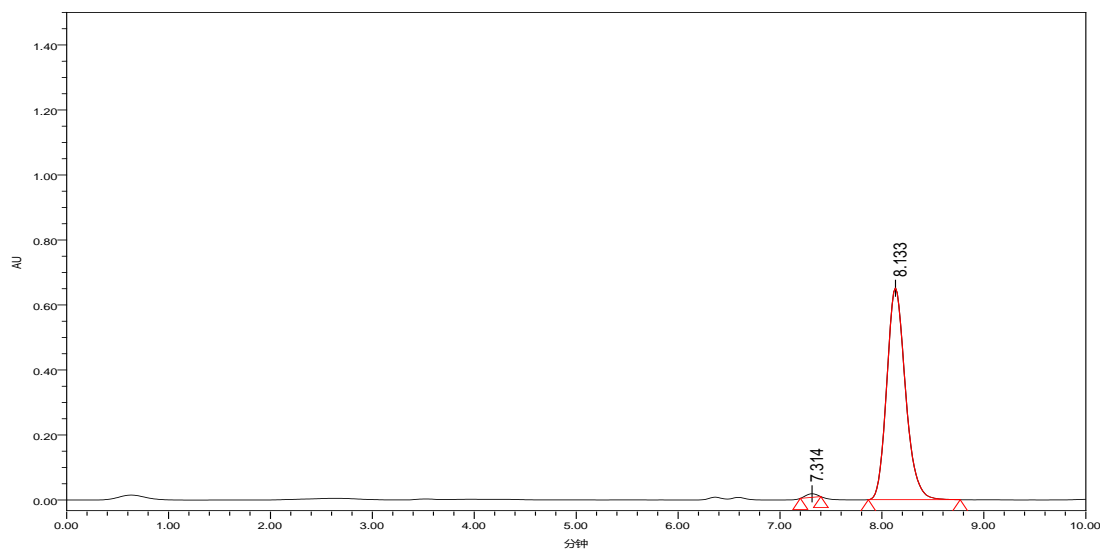

| Peak | Ret Time[min] | Area    | % Area | Height |
|------|---------------|---------|--------|--------|
| 1    | 7.314         | 78123   | 0.93   | 10852  |
| 2    | 8.133         | 8305713 | 99.07  | 651013 |

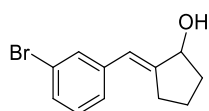

**Racemate-3h**

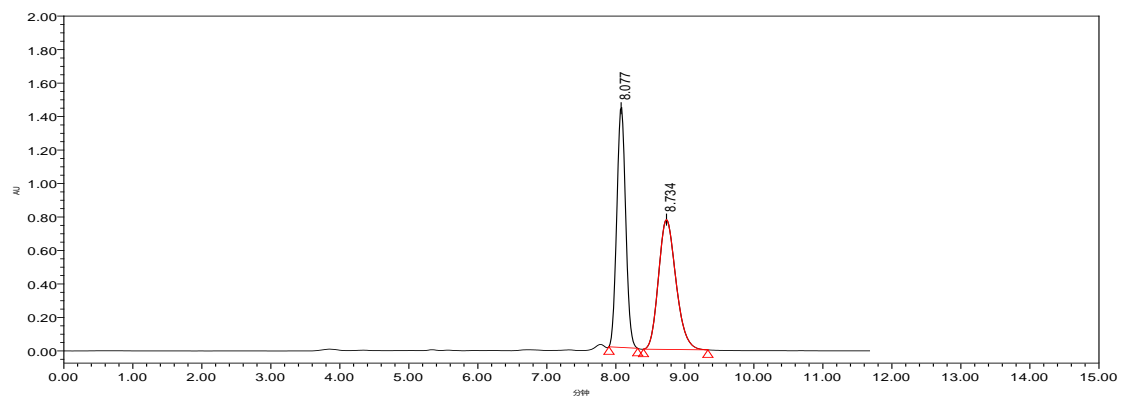

| Peak | Ret Time[min] | Area     | % Area | Height  |
|------|---------------|----------|--------|---------|
| 1    | 8.077         | 12972951 | 49.31  | 1441967 |
| 2    | 8.734         | 13333409 | 50.69  | 768225  |

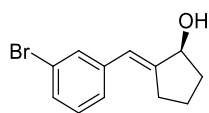

**(S)-3h**

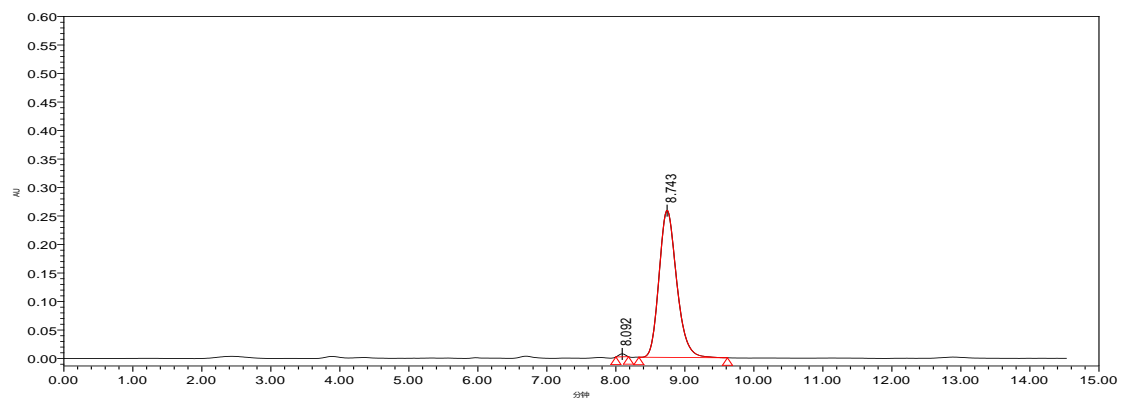

| Peak | Ret Time[min] | Area    | % Area | Height |
|------|---------------|---------|--------|--------|
| 1    | 8.092         | 12818   | 0.28   | 2926   |
| 2    | 8.743         | 4580698 | 99.72  | 258156 |

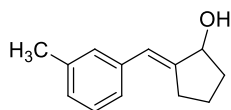

Racemate-3i

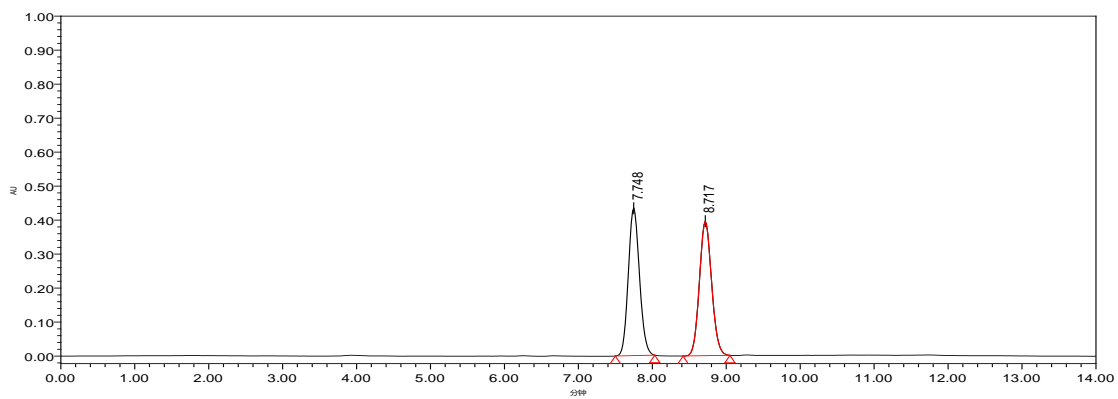

| Peak | Ret Time[min] | Area    | % Area | Height |
|------|---------------|---------|--------|--------|
| 1    | 7.748         | 4586533 | 50.18  | 434959 |
| 2    | 8.717         | 4553563 | 49.82  | 395813 |

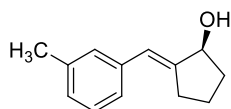

(S)-3i

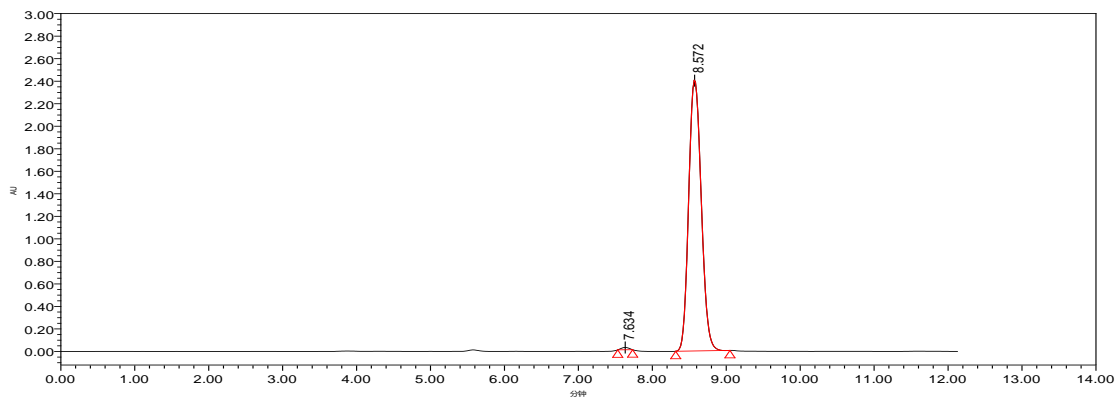

| Peak | Ret Time[min] | Area     | % Area | Height  |
|------|---------------|----------|--------|---------|
| 1    | 7.634         | 146683   | 0.51   | 20663   |
| 2    | 8.572         | 28440254 | 99.49  | 2411793 |

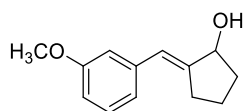

Racemate-3j

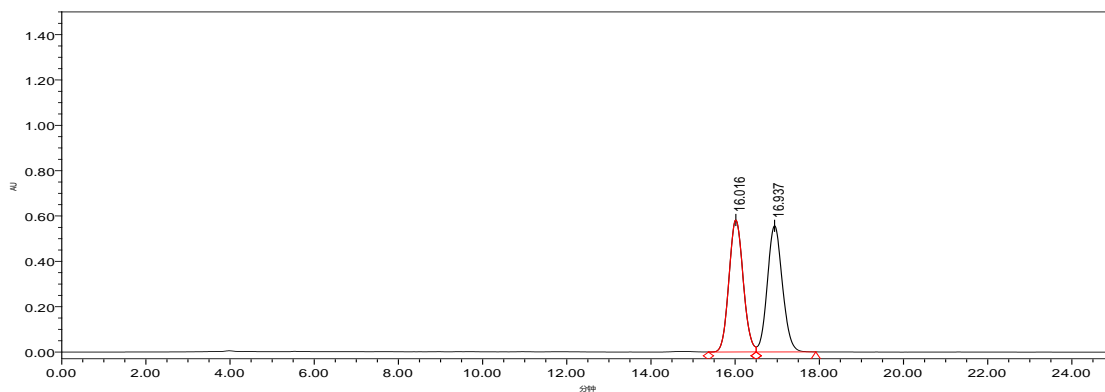

| Peak | Ret Time[min] | Area     | % Area | Height |
|------|---------------|----------|--------|--------|
| 1    | 16.016        | 13003578 | 50.50  | 570523 |
| 2    | 16.937        | 12744143 | 49.50  | 537409 |

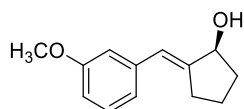

(S)-3j

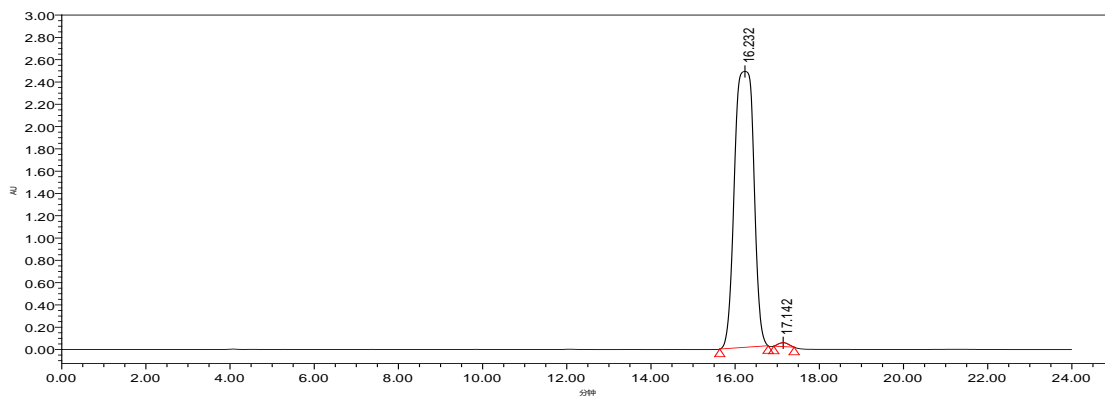

| Peak | Ret Time[min] | Area     | % Area | Height  |
|------|---------------|----------|--------|---------|
| 1    | 16.232        | 79103881 | 99.24  | 2475159 |
| 2    | 17.142        | 602515   | 0.76   | 35196   |

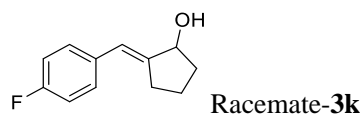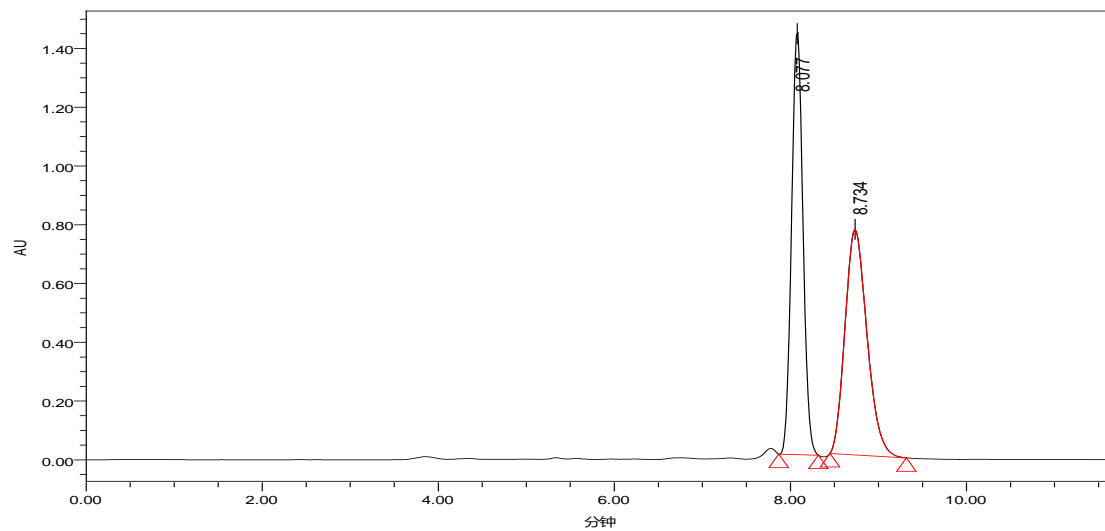

| Peak | Ret Time[min] | Area     | % Area | Height  |
|------|---------------|----------|--------|---------|
| 1    | 8.077         | 12972951 | 49.31  | 1441967 |
| 2    | 8.734         | 13333409 | 50.69  | 768225  |

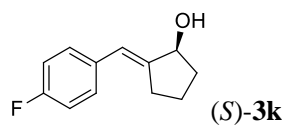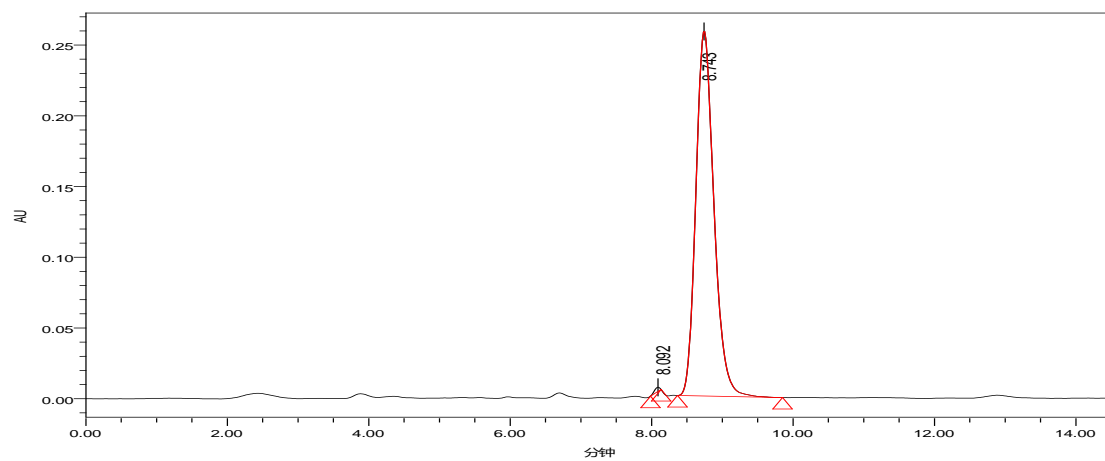

| Peak | Ret Time[min] | Area    | % Area | Height |
|------|---------------|---------|--------|--------|
| 1    | 8.092         | 16061   | 0.35   | 2947   |
| 2    | 8.743         | 4592187 | 99.65  | 258249 |

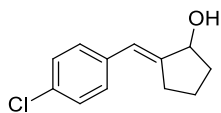

**Racemate-3I**

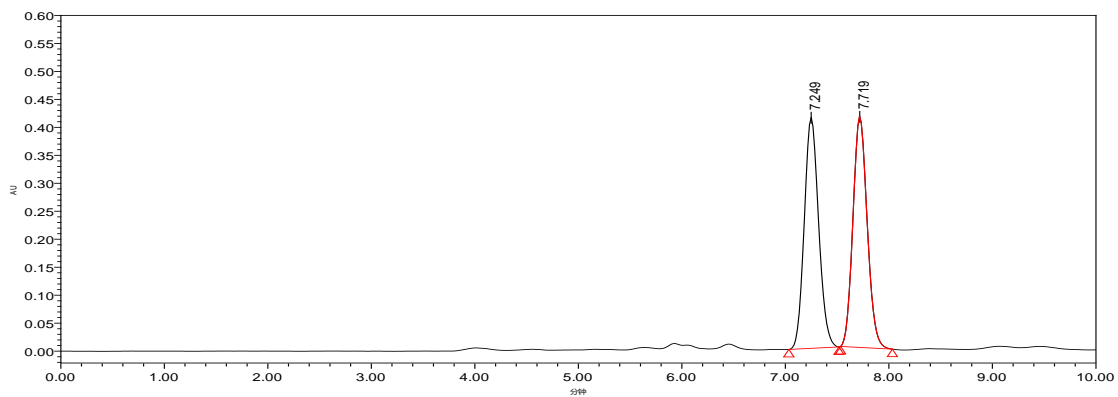

| Peak | Ret Time[min] | Area    | % Area | Height |
|------|---------------|---------|--------|--------|
| 1    | 7.249         | 3970295 | 50.48  | 411759 |
| 2    | 7.719         | 3894911 | 49.52  | 410521 |

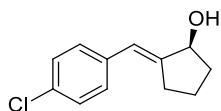

**(S)-3I**

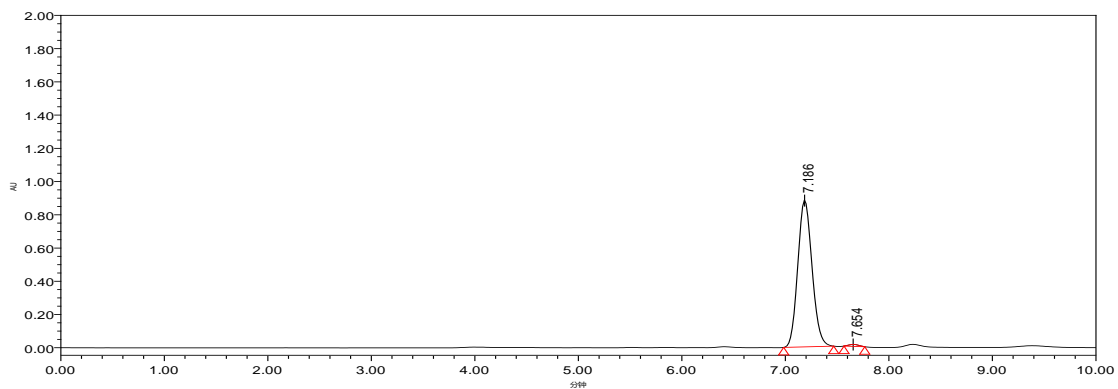

| Peak | Ret Time[min] | Area    | % Area | Height |
|------|---------------|---------|--------|--------|
| 1    | 7.186         | 8446556 | 99.09  | 883463 |
| 2    | 7.654         | 77773   | 0.91   | 11230  |

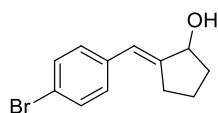

Racemate-3m

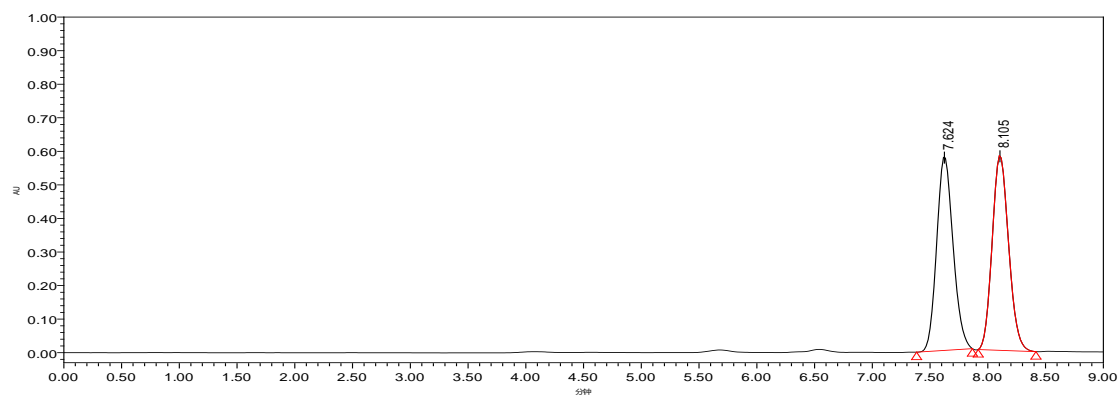

| Peak | Ret Time[min] | Area    | % Area | Height |
|------|---------------|---------|--------|--------|
| 1    | 7.624         | 5722518 | 49.73  | 579331 |
| 2    | 8.105         | 5784658 | 50.27  | 582770 |

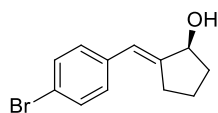

(S)-3m

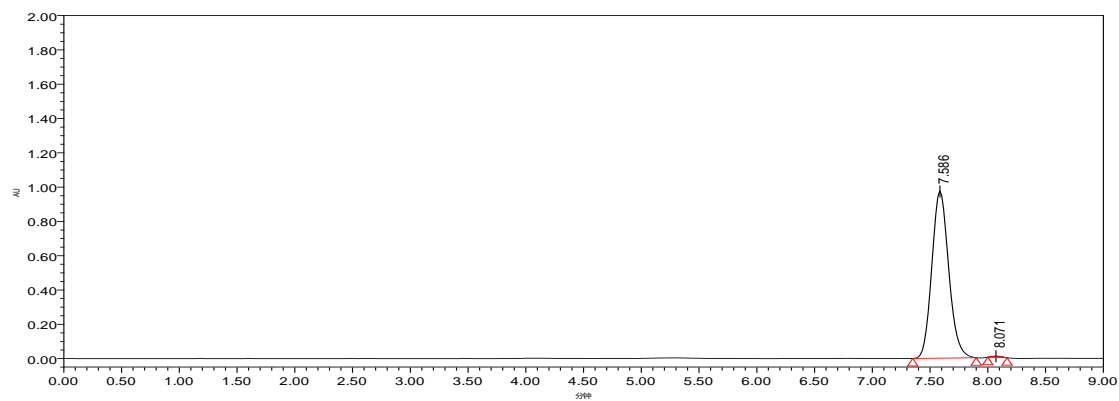

| Peak | Ret Time[min] | Area    | % Area | Height |
|------|---------------|---------|--------|--------|
| 1    | 7.586         | 9892892 | 99.56  | 974730 |
| 2    | 8.071         | 43892   | 0.44   | 7277   |

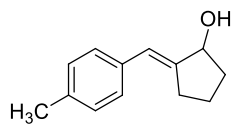

**Racemate-3n**

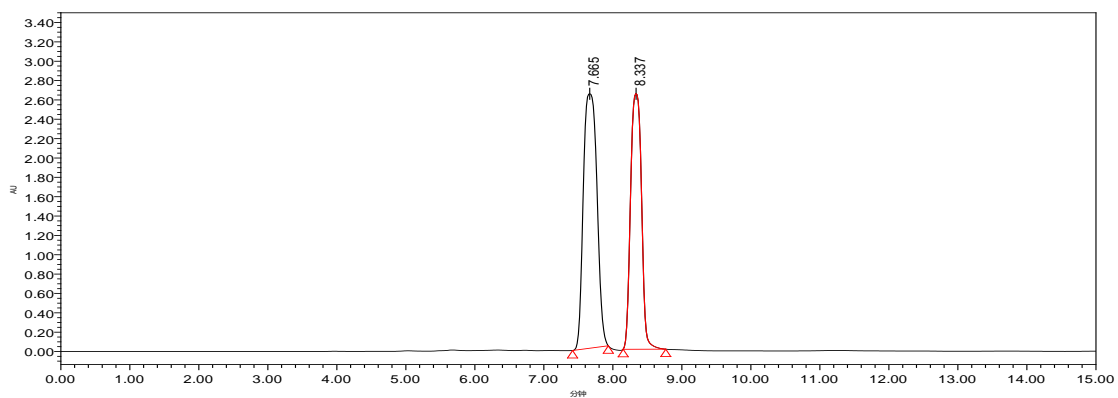

| Peak | Ret Time[min] | Area     | % Area | Height  |
|------|---------------|----------|--------|---------|
| 1    | 7.665         | 33184993 | 50.82  | 2632287 |
| 2    | 8.337         | 32114088 | 49.18  | 2648136 |

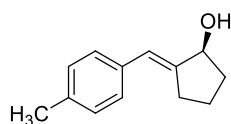

**(S)-3n**

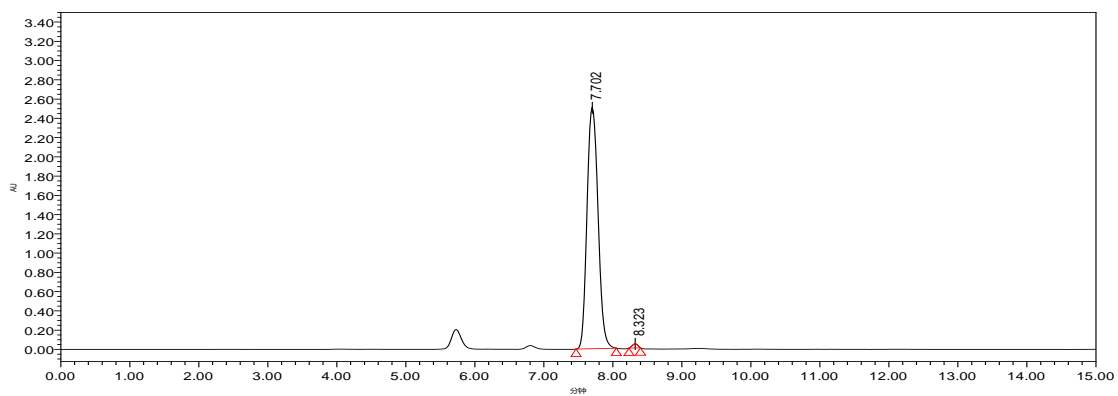

| Peak | Ret Time[min] | Area     | % Area | Height  |
|------|---------------|----------|--------|---------|
| 1    | 7.702         | 27851448 | 99.14  | 2507543 |
| 2    | 8.323         | 240657   | 0.86   | 43142   |



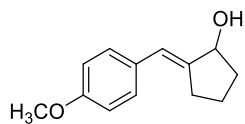

Racemate-**30**

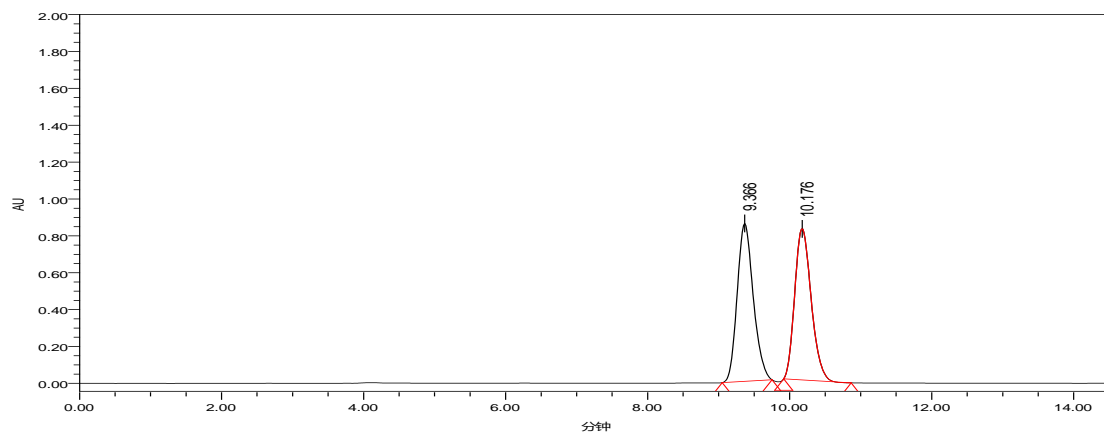

| Peak | Ret Time[min] | Area     | % Area | Height |
|------|---------------|----------|--------|--------|
| 1    | 9.366         | 13481787 | 50.38  | 856629 |
| 2    | 10.176        | 13277151 | 49.62  | 821530 |

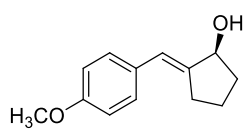

(*S*)-**30**

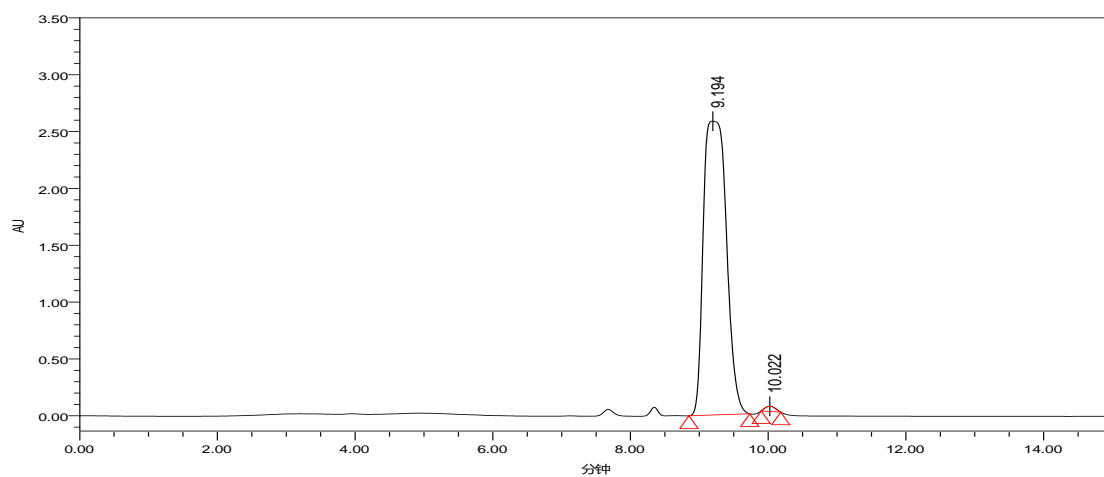

| Peak | Ret Time[min] | Area     | % Area | Height  |
|------|---------------|----------|--------|---------|
| 1    | 9.194         | 60157590 | 99.23  | 2586343 |
| 2    | 10.022        | 469759   | 0.77   | 46129   |

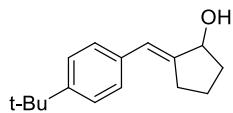

Racemate-3p

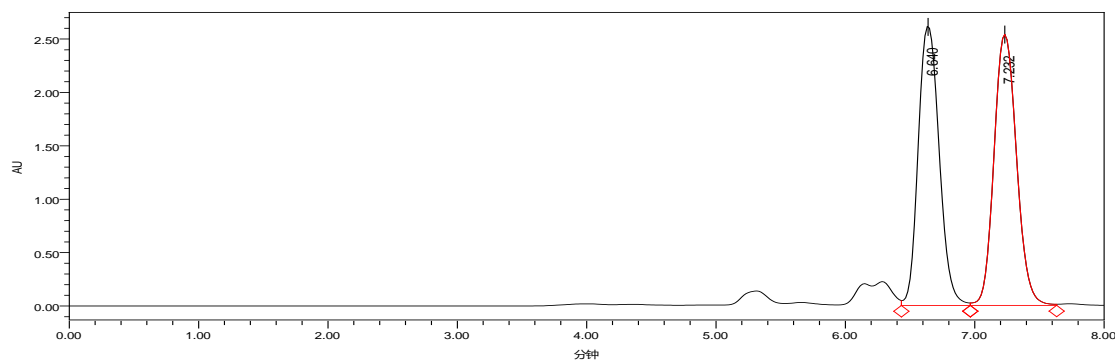

| Peak | Ret Time[min] | Area     | % Area | Height  |
|------|---------------|----------|--------|---------|
| 1    | 6.640         | 29542379 | 49.04  | 2621876 |
| 2    | 7.232         | 30703327 | 50.96  | 2537610 |

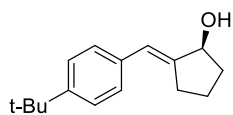

(S)-3p

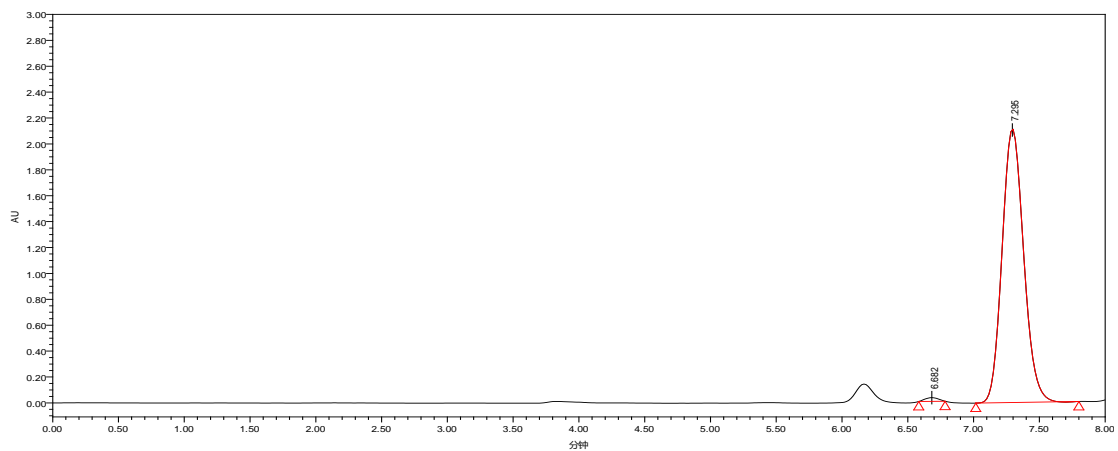

| Peak | Ret Time[min] | Area     | % Area | Height  |
|------|---------------|----------|--------|---------|
| 1    | 6.682         | 166545   | 0.69   | 25436   |
| 2    | 7.295         | 24111024 | 99.31  | 2113891 |

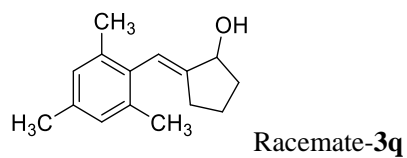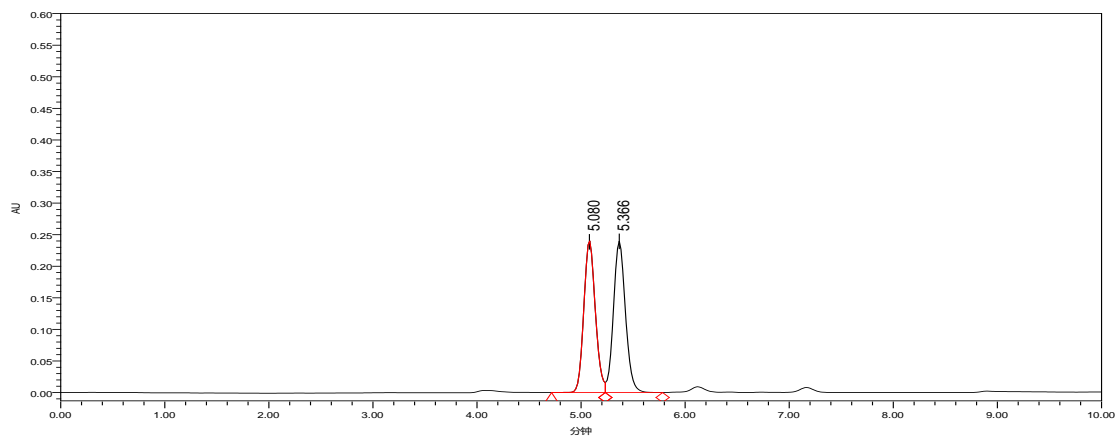

| Peak | Ret Time[min] | Area    | % Area | Height |
|------|---------------|---------|--------|--------|
| 1    | 5.080         | 1853030 | 49.04  | 239919 |
| 2    | 5.366         | 1925367 | 50.96  | 239013 |

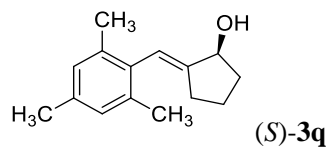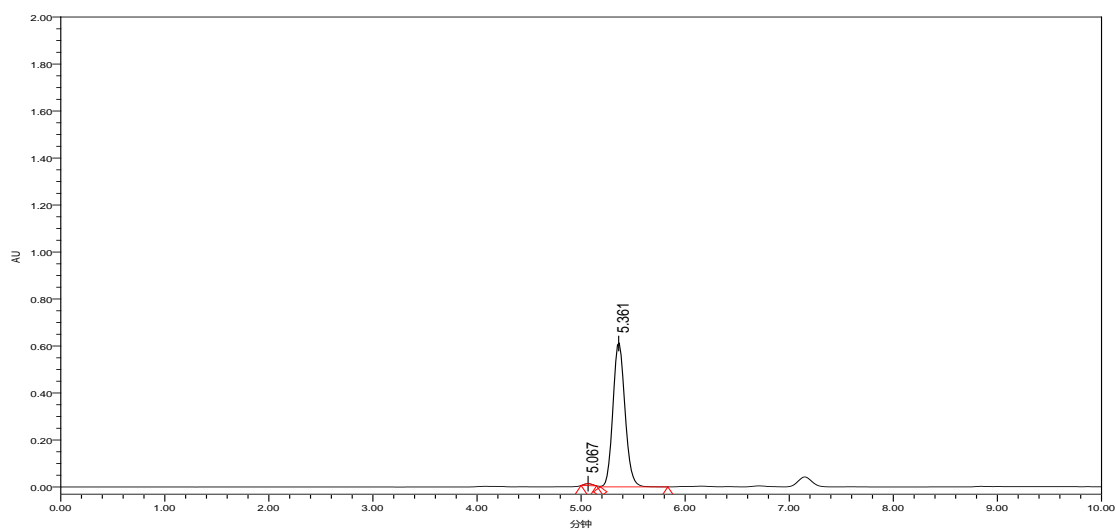

| Peak | Ret Time[min] | Area    | % Area | Height |
|------|---------------|---------|--------|--------|
| 1    | 5.067         | 44800   | 0.90   | 8485   |
| 2    | 5.361         | 4951964 | 99.10  | 614145 |

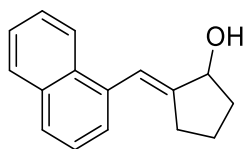

Racemate-3r

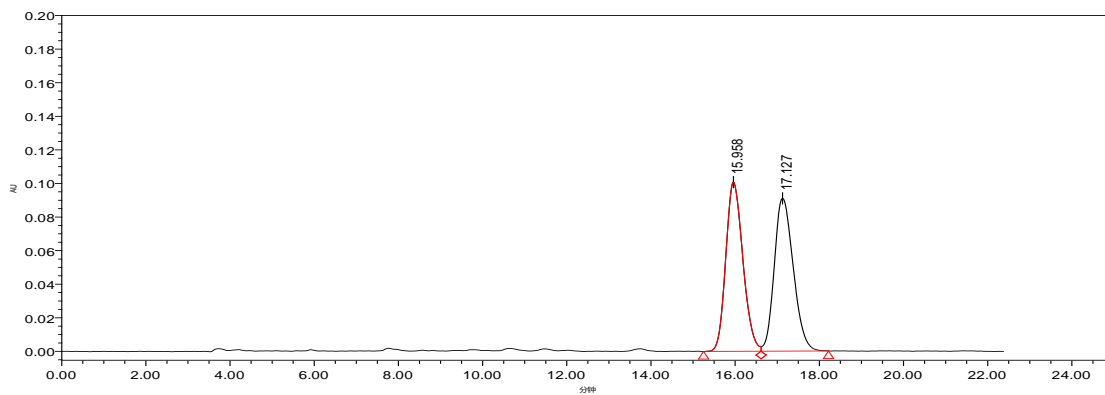

| Peak | Ret Time[min] | Area    | % Area | Height |
|------|---------------|---------|--------|--------|
| 1    | 15.958        | 2843661 | 49.87  | 100923 |
| 2    | 17.127        | 2858741 | 50.13  | 91068  |

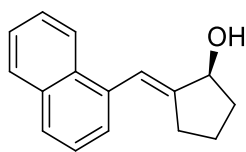

(S)-3r

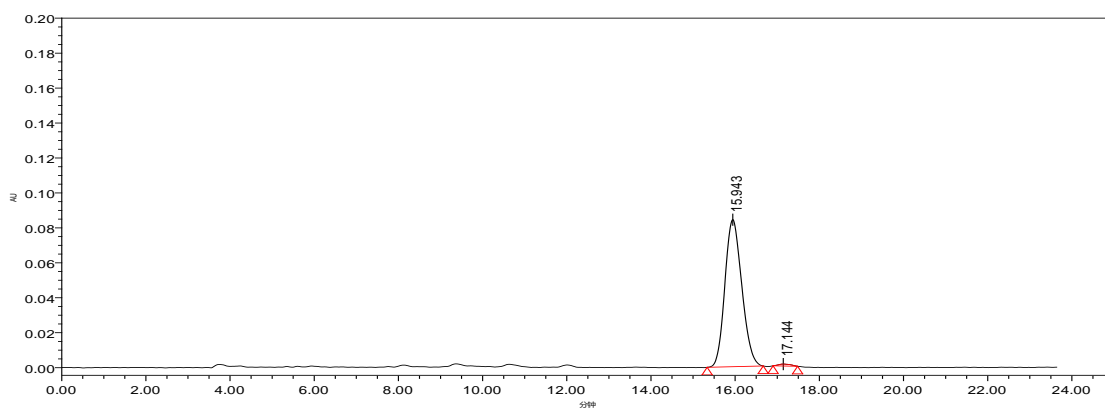

| Peak | Ret Time[min] | Area    | % Area | Height |
|------|---------------|---------|--------|--------|
| 1    | 15.943        | 2350320 | 99.05  | 84238  |
| 2    | 17.144        | 22525   | 0.95   | 1092   |

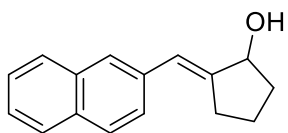

Racemate-3s

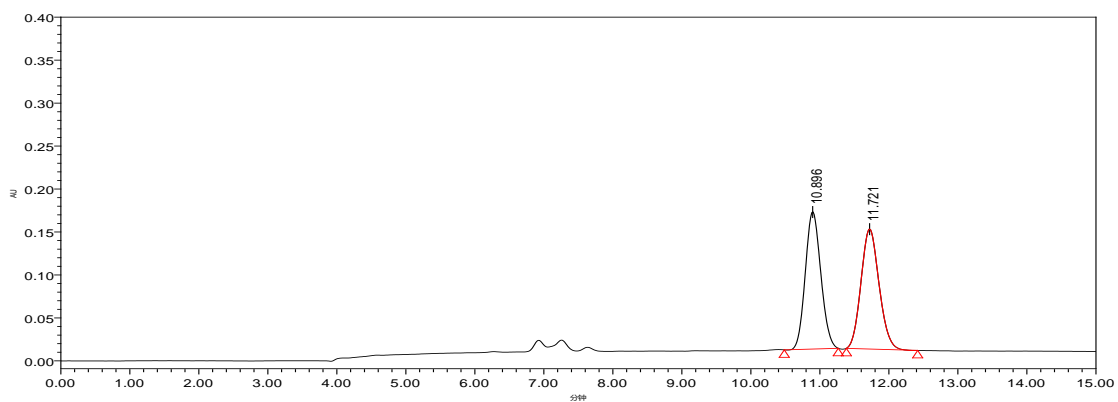

| Peak | Ret Time[min] | Area    | % Area | Height |
|------|---------------|---------|--------|--------|
| 1    | 10.896        | 2497792 | 49.55  | 159828 |
| 2    | 11.721        | 2542780 | 50.45  | 139740 |

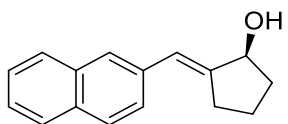

(S)-3s

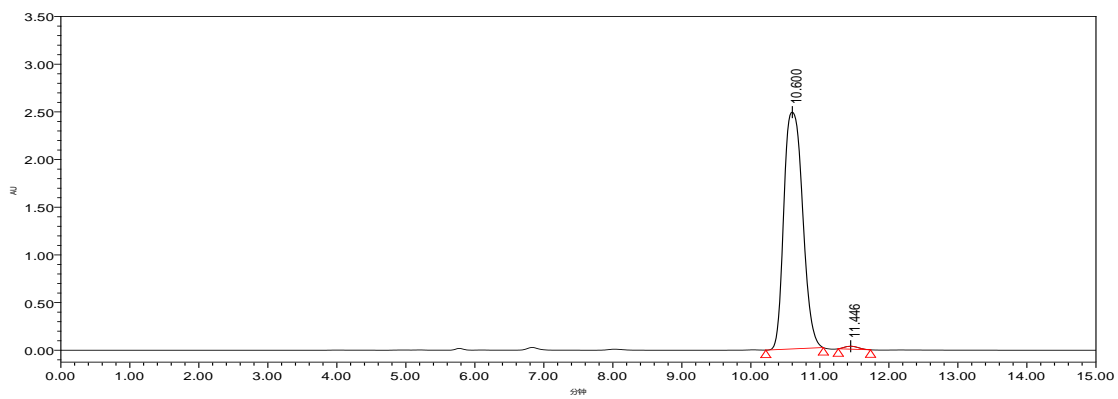

| Peak | Ret Time[min] | Area     | % Area | Height  |
|------|---------------|----------|--------|---------|
| 1    | 10.600        | 47075095 | 99.08  | 2484993 |
| 2    | 11.446        | 435260   | 0.92   | 30935   |

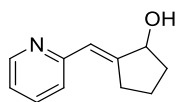

Racemate-3t

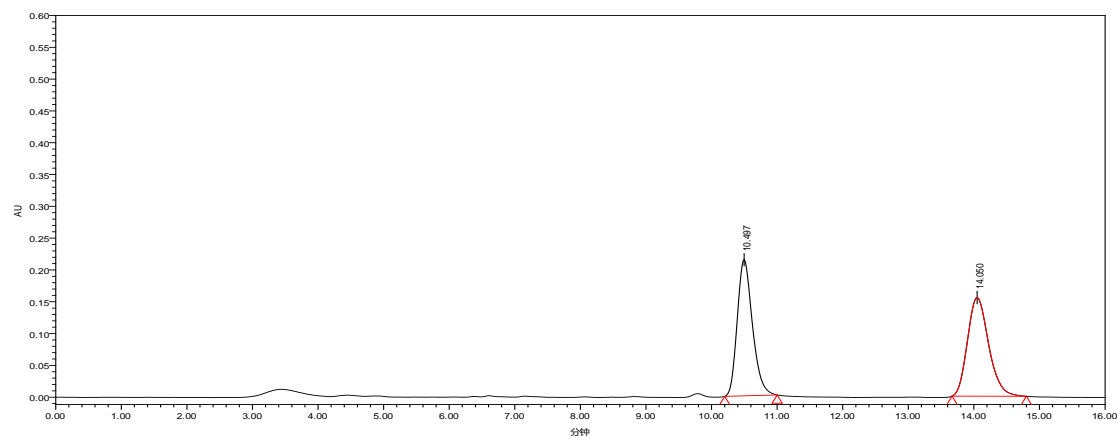

| Peak | Ret Time[min] | Area    | % Area | Height |
|------|---------------|---------|--------|--------|
| 1    | 10.497        | 3440811 | 49.73  | 214430 |
| 2    | 14.050        | 3478750 | 50.27  | 155195 |

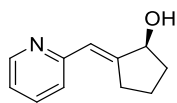

(S)-3t

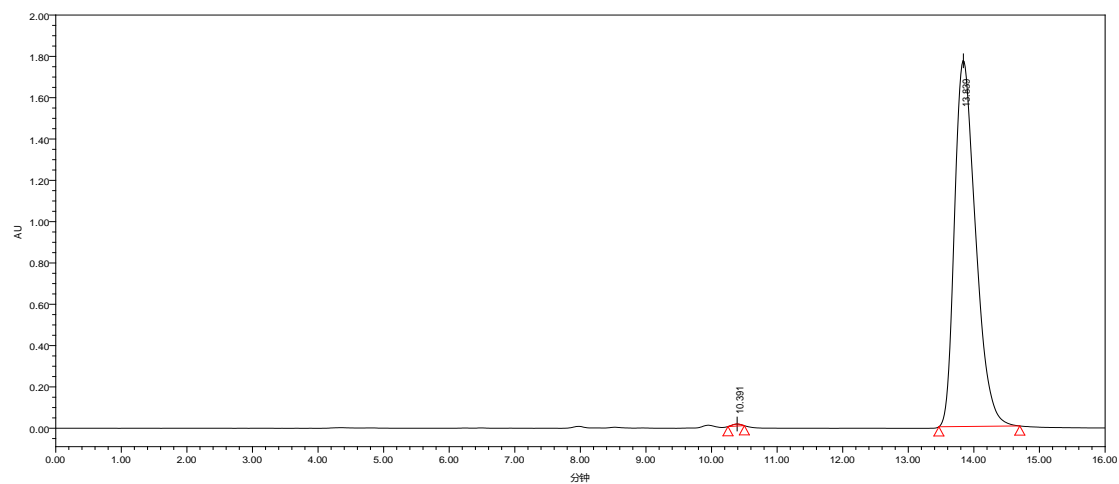

| Peak | Ret Time[min] | Area     | % Area | Height  |
|------|---------------|----------|--------|---------|
| 1    | 10.391        | 89145    | 0.22   | 9913    |
| 2    | 13.839        | 39573214 | 99.78  | 1773150 |

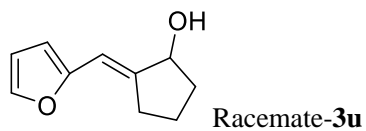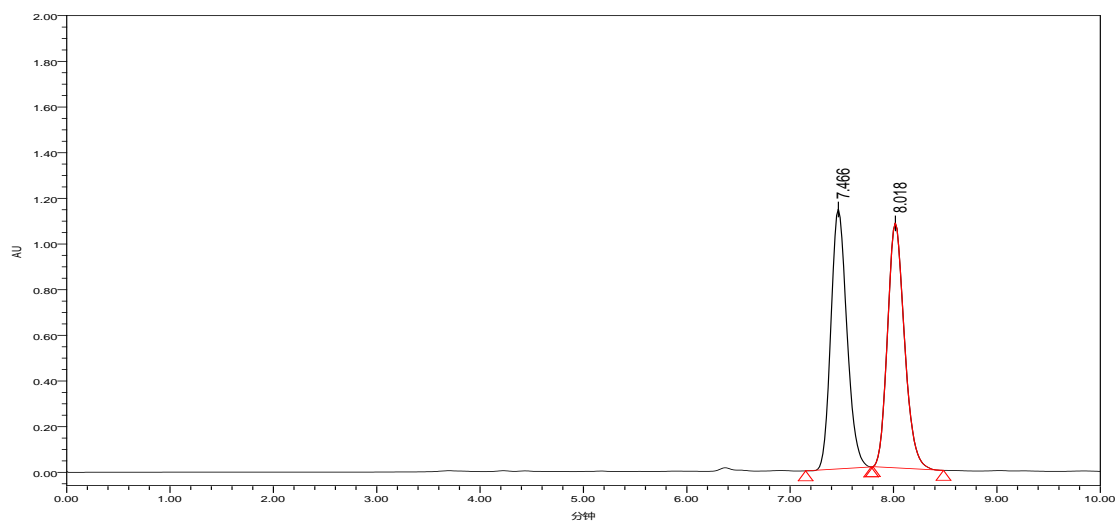

| Peak | Ret Time[min] | Area     | % Area | Height  |
|------|---------------|----------|--------|---------|
| 1    | 7.466         | 12251900 | 50.06  | 1136797 |
| 2    | 8.018         | 12224006 | 49.94  | 1071621 |

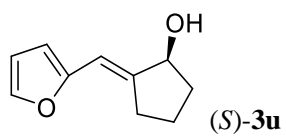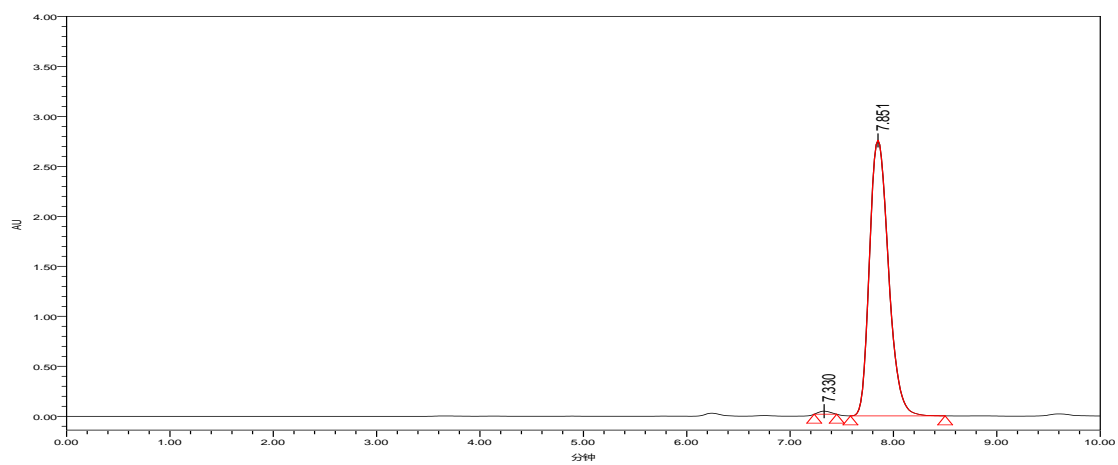

| Peak | Ret Time[min] | Area     | % Area | Height  |
|------|---------------|----------|--------|---------|
| 1    | 7.330         | 270035   | 0.76   | 32987   |
| 2    | 7.851         | 35180058 | 99.24  | 2754864 |

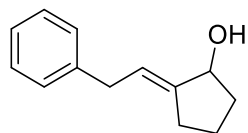

Racemate-3v

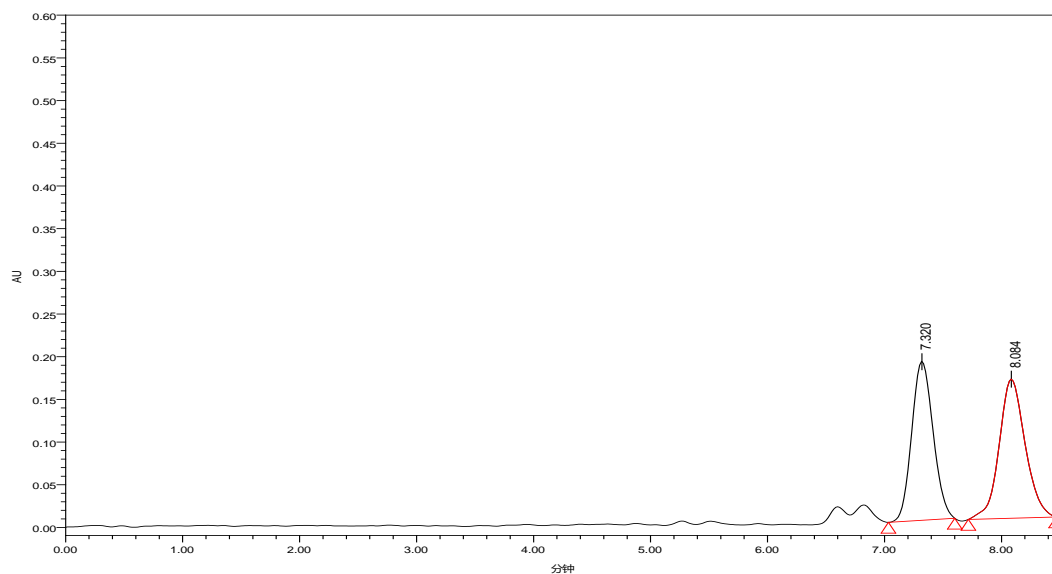

| Peak | Ret Time[min] | Area    | % Area | Height |
|------|---------------|---------|--------|--------|
| 1    | 7.320         | 2415495 | 49.50  | 186308 |
| 2    | 8.084         | 2464293 | 50.50  | 163016 |

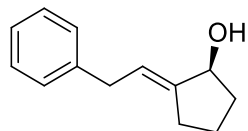

(S)-3v

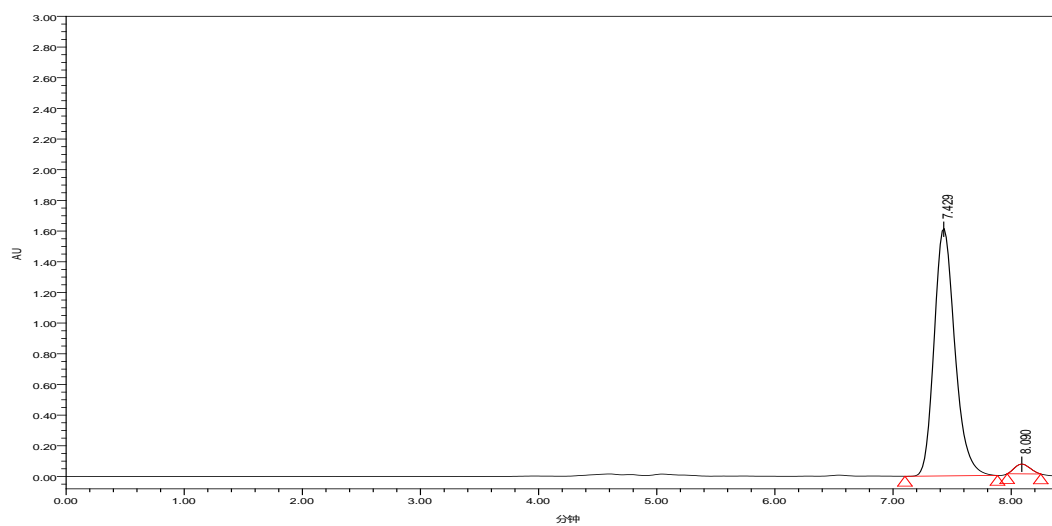

| Peak | Ret Time[min] | Area     | % Area | Height  |
|------|---------------|----------|--------|---------|
| 1    | 7.429         | 19663250 | 97.16  | 1614462 |
| 2    | 8.090         | 575439   | 2.84   | 63701   |



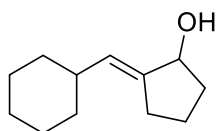

Racemate-3w

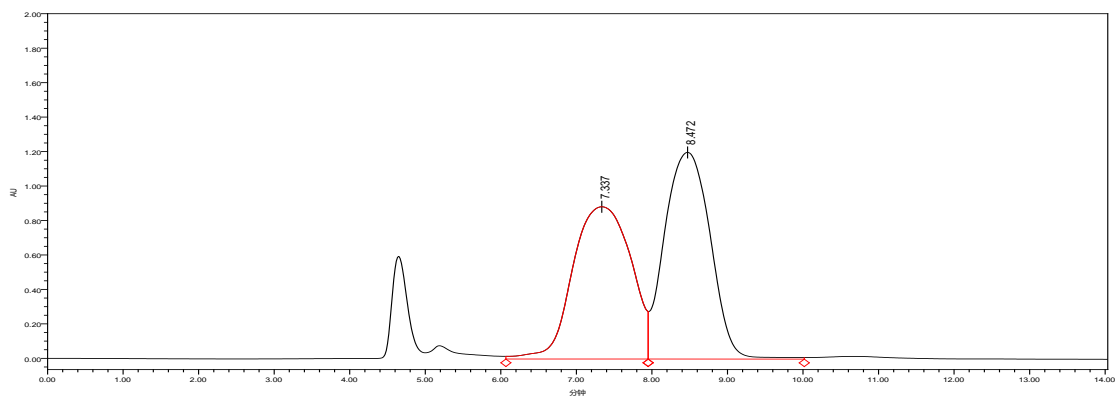

| Peak | Ret Time[min] | Area     | % Area | Height  |
|------|---------------|----------|--------|---------|
| 1    | 7.337         | 48286526 | 49.33  | 883836  |
| 2    | 8.472         | 49598182 | 50.67  | 1199708 |

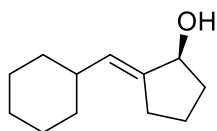

(S)-3w

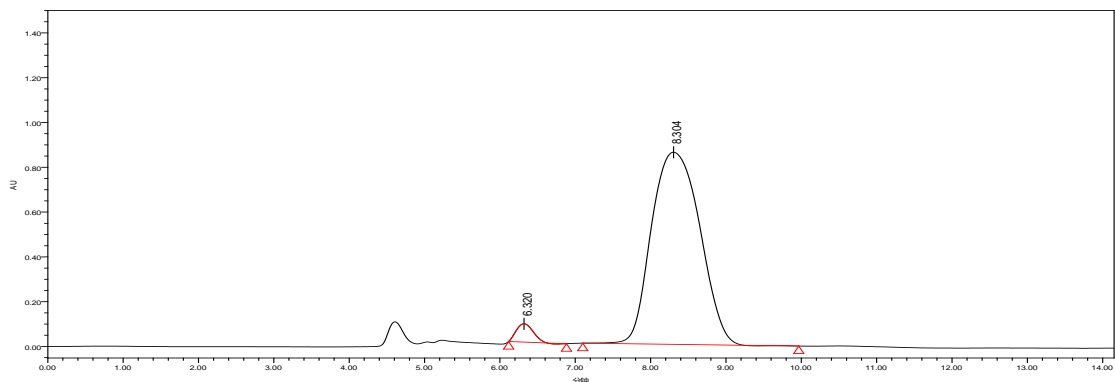

| Peak | Ret Time[min] | Area     | % Area | Height |
|------|---------------|----------|--------|--------|
| 1    | 6.320         | 1310983  | 3.30   | 81890  |
| 2    | 8.304         | 38420284 | 96.70  | 858108 |

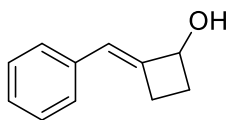

Racemate-5a

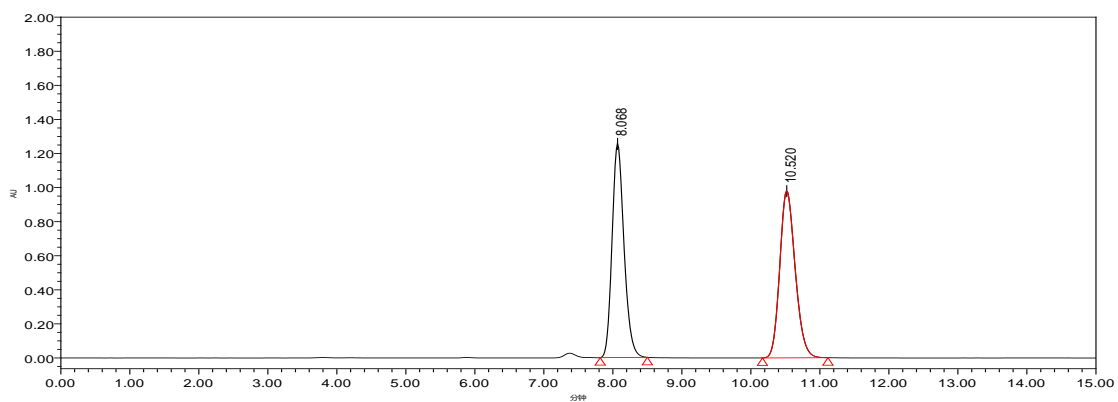

| Peak | Ret Time[min] | Area     | % Area | Height  |
|------|---------------|----------|--------|---------|
| 1    | 8.068         | 15072449 | 49.74  | 1256223 |
| 2    | 10.520        | 15228908 | 50.26  | 980715  |

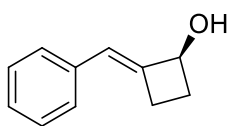

(S)-5a

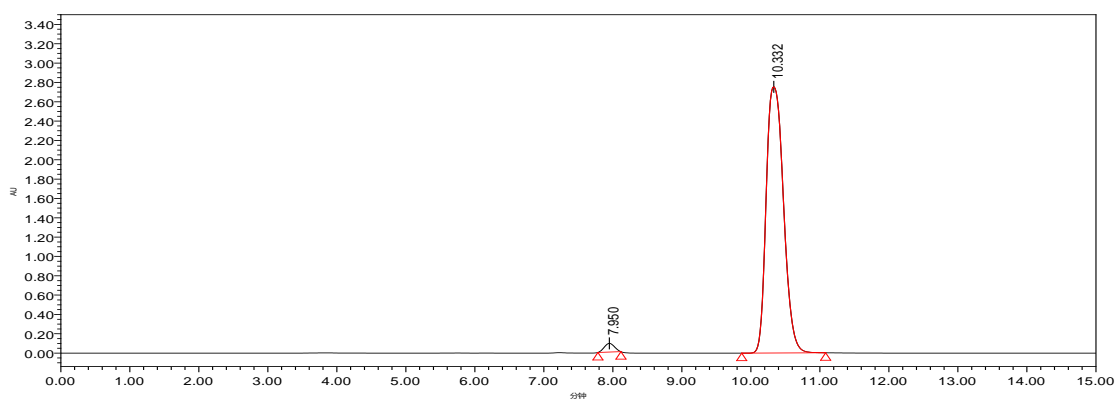

| Peak | Ret Time[min] | Area     | % Area | Height  |
|------|---------------|----------|--------|---------|
| 1    | 7.950         | 916831   | 1.87   | 90039   |
| 2    | 10.332        | 48029001 | 98.13  | 2754889 |

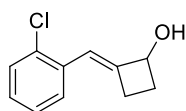

Racemate-5b

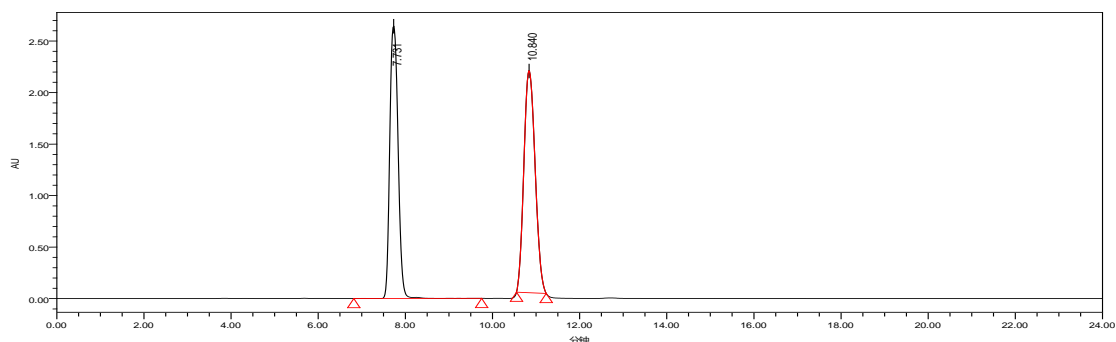

| Peak | Ret Time[min] | Area     | % Area | Height  |
|------|---------------|----------|--------|---------|
| 1    | 7.731         | 36156894 | 49.10  | 2646580 |
| 2    | 10.840        | 37482401 | 50.90  | 2157896 |

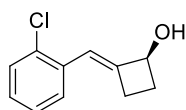

(S)-5b

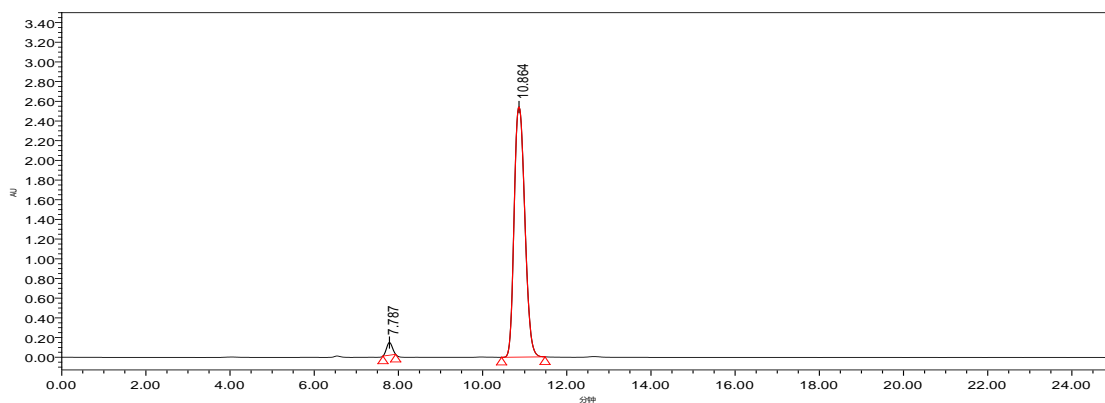

| Peak | Ret Time[min] | Area     | % Area | Height  |
|------|---------------|----------|--------|---------|
| 1    | 7.787         | 1217890  | 2.65   | 129866  |
| 2    | 10.864        | 44763301 | 97.35  | 2543465 |

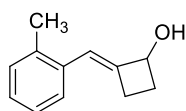

Racemate-5c

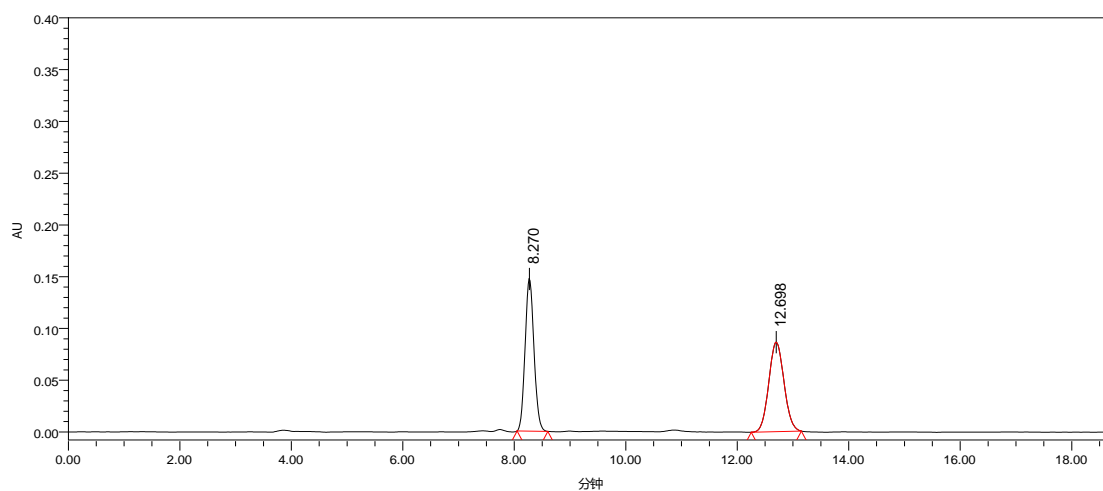

| Peak | Ret Time[min] | Area    | % Area | Height |
|------|---------------|---------|--------|--------|
| 1    | 8.270         | 1635115 | 49.93  | 147578 |
| 2    | 12.698        | 1639429 | 50.07  | 86544  |

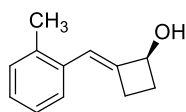

(S)-5c

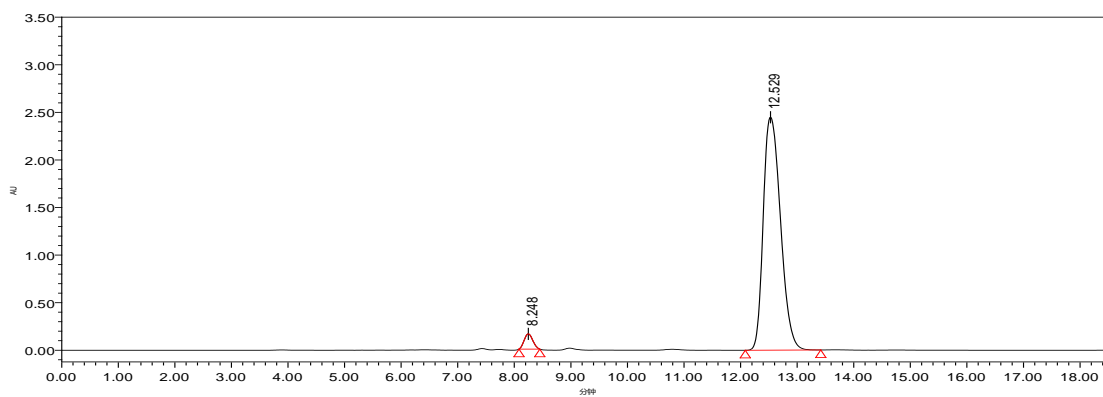

| Peak | Ret Time[min] | Area     | % Area | Height  |
|------|---------------|----------|--------|---------|
| 1    | 8.248         | 1697786  | 3.17   | 161079  |
| 2    | 12.529        | 51864779 | 96.83  | 2449923 |

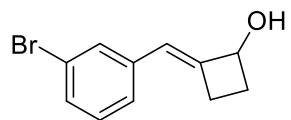

Racemate-5d

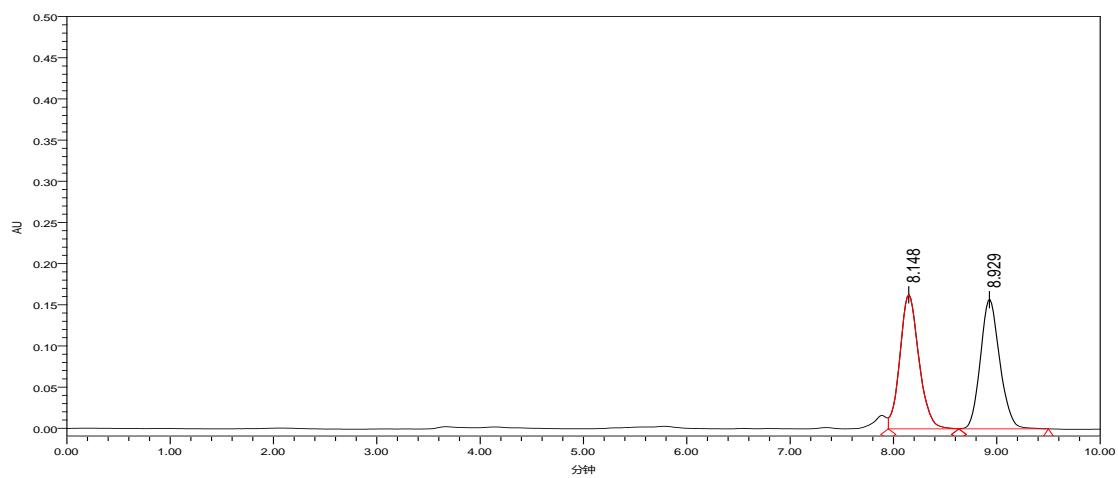

| Peak | Ret Time[min] | Area    | % Area | Height |
|------|---------------|---------|--------|--------|
| 1    | 8.148         | 2087126 | 50.48  | 163110 |
| 2    | 8.929         | 2047516 | 49.52  | 157544 |

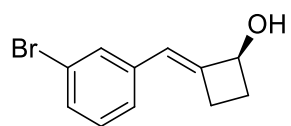

(S)-5d

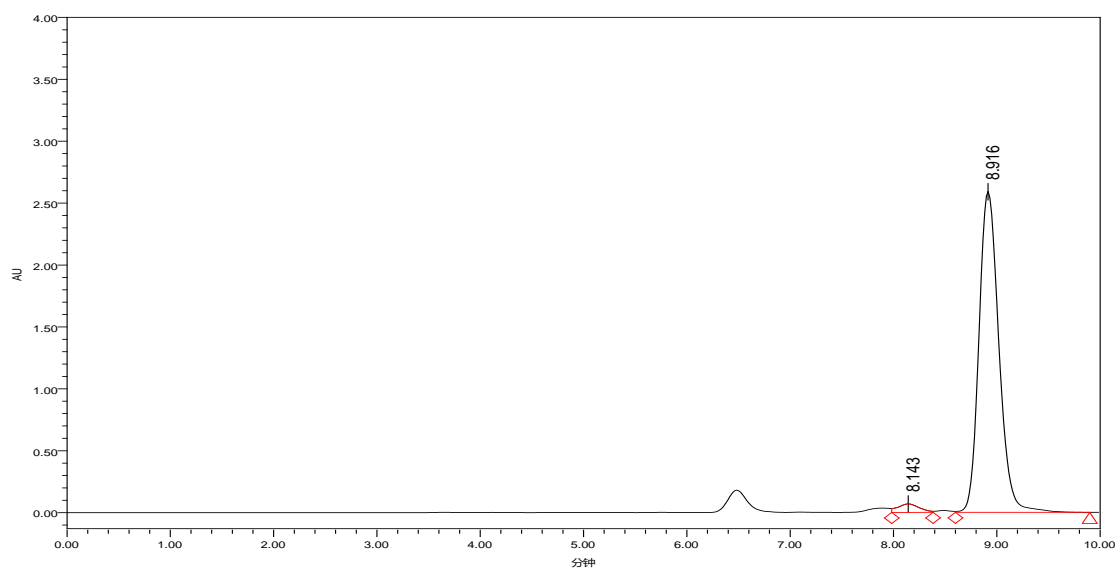

| Peak | Ret Time[min] | Area     | % Area | Height  |
|------|---------------|----------|--------|---------|
| 1    | 8.143         | 989320   | 1.77   | 68441   |
| 2    | 8.916         | 34714653 | 99.03  | 2591497 |

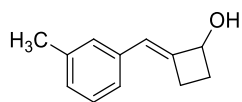

Racemate-5e

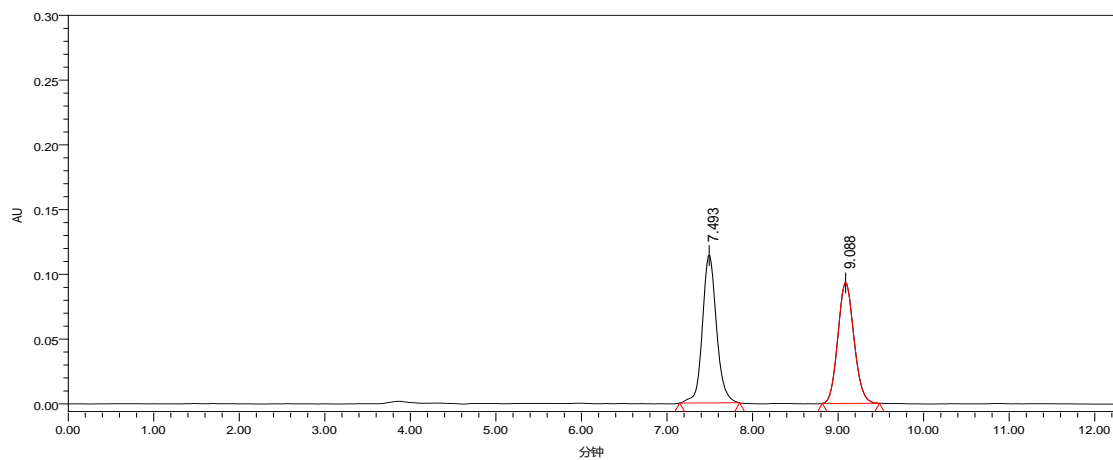

| Peak | Ret Time[min] | Area    | % Area | Height |
|------|---------------|---------|--------|--------|
| 1    | 7.493         | 1274166 | 50.74  | 114459 |
| 2    | 9.088         | 1237005 | 49.26  | 93448  |

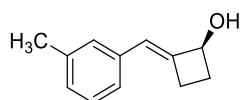

(S)-5e

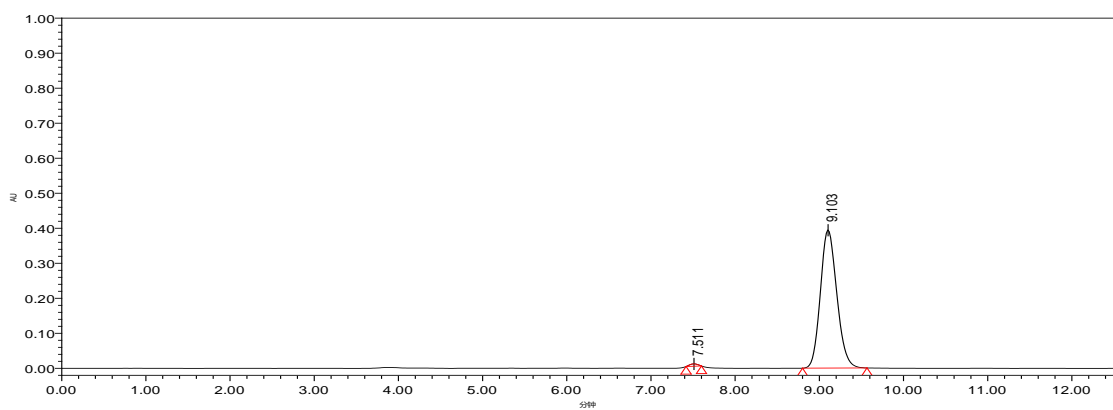

| Peak | Ret Time[min] | Area    | % Area | Height |
|------|---------------|---------|--------|--------|
| 1    | 7.511         | 45201   | 0.84   | 6785   |
| 2    | 9.103         | 5347050 | 99.16  | 394694 |

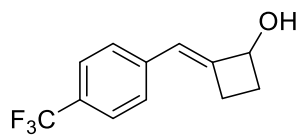

Racemate-**5f**

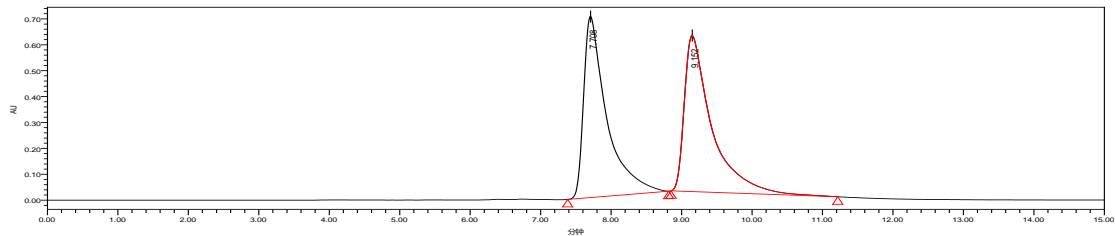

| Peak | Ret Time[min] | Area     | % Area | Height |
|------|---------------|----------|--------|--------|
| 1    | 7.708         | 15859510 | 49.55  | 701292 |
| 2    | 9.152         | 16150286 | 50.45  | 603219 |

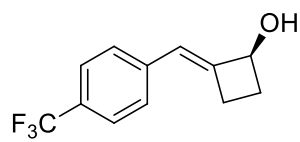

(*S*)-**5f**

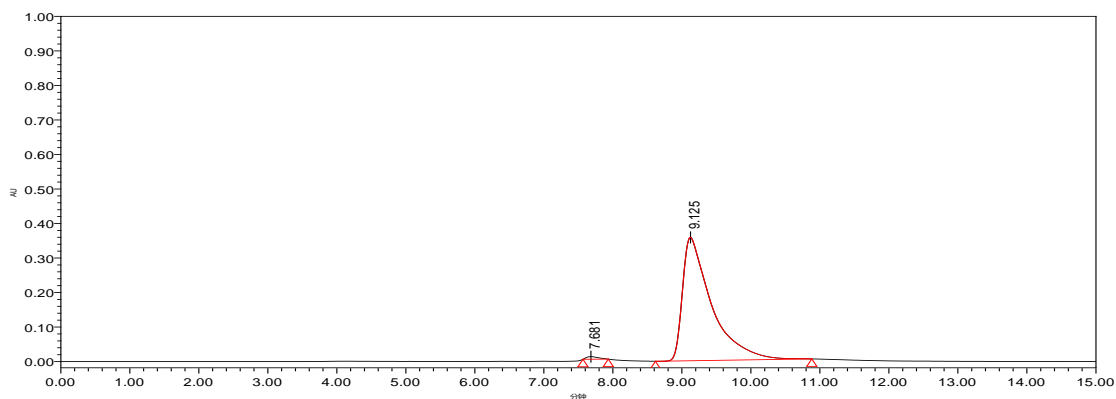

| Peak | Ret Time[min] | Area     | % Area | Height |
|------|---------------|----------|--------|--------|
| 1    | 7.681         | 90411    | 0.86   | 7505   |
| 2    | 9.125         | 10411752 | 99.14  | 358274 |

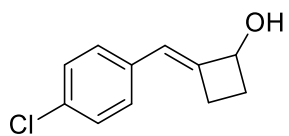

Racemate-5g

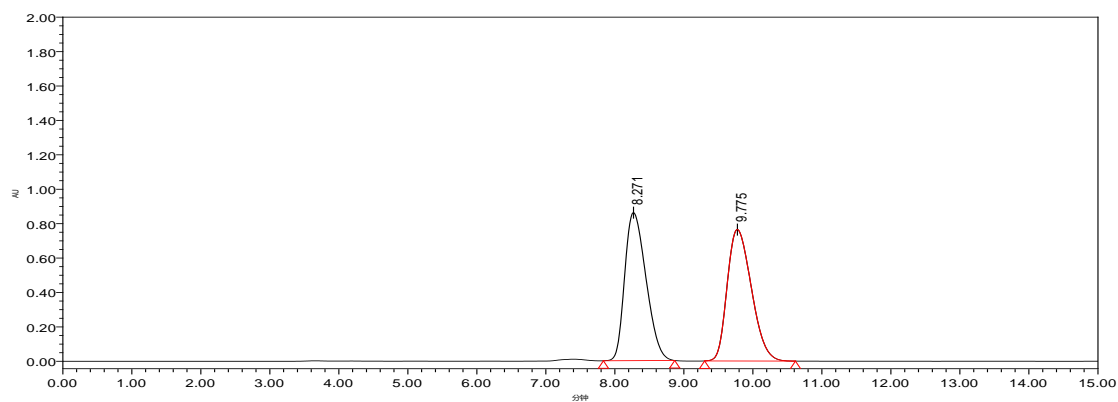

| Peak | Ret Time[min] | Area     | % Area | Height |
|------|---------------|----------|--------|--------|
| 1    | 8.271         | 18460373 | 49.79  | 861762 |
| 2    | 9.775         | 18618272 | 50.21  | 765078 |

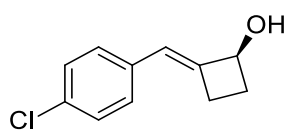

(S)-5g

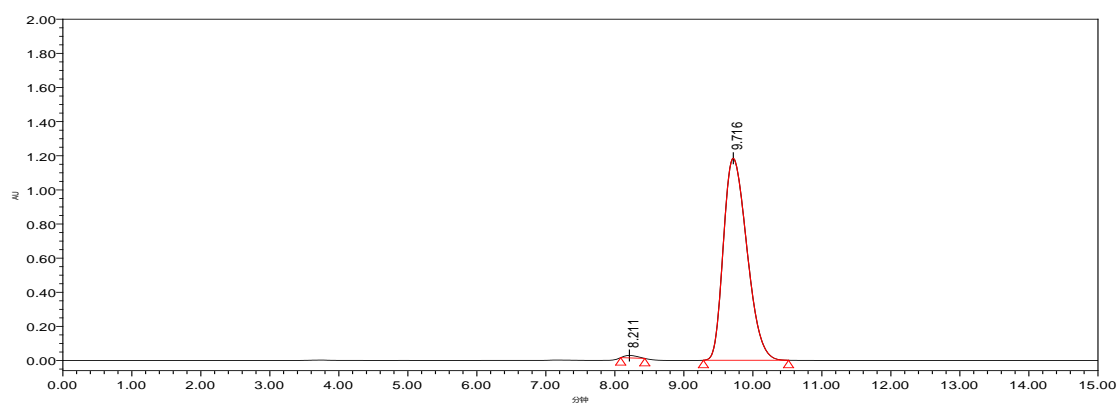

| Peak | Ret Time[min] | Area     | % Area | Height  |
|------|---------------|----------|--------|---------|
| 1    | 8.211         | 187556   | 0.66   | 14458   |
| 2    | 9.716         | 28092931 | 99.34  | 1183722 |



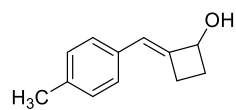

Racemate-5h

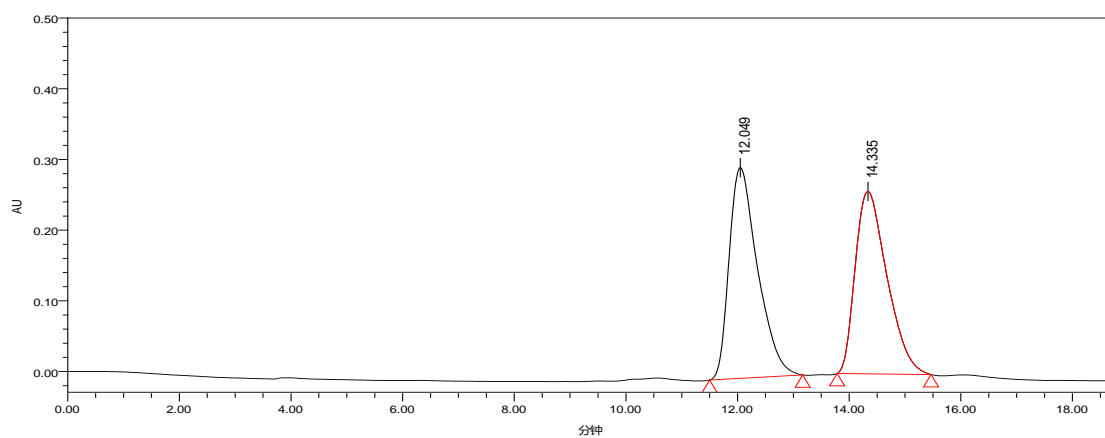

| Peak | Ret Time[min] | Area     | % Area | Height |
|------|---------------|----------|--------|--------|
| 1    | 12.049        | 10561923 | 50.85  | 298279 |
| 2    | 14.335        | 10208165 | 49.15  | 258153 |

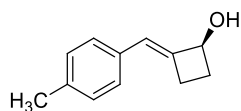

(S)-5h

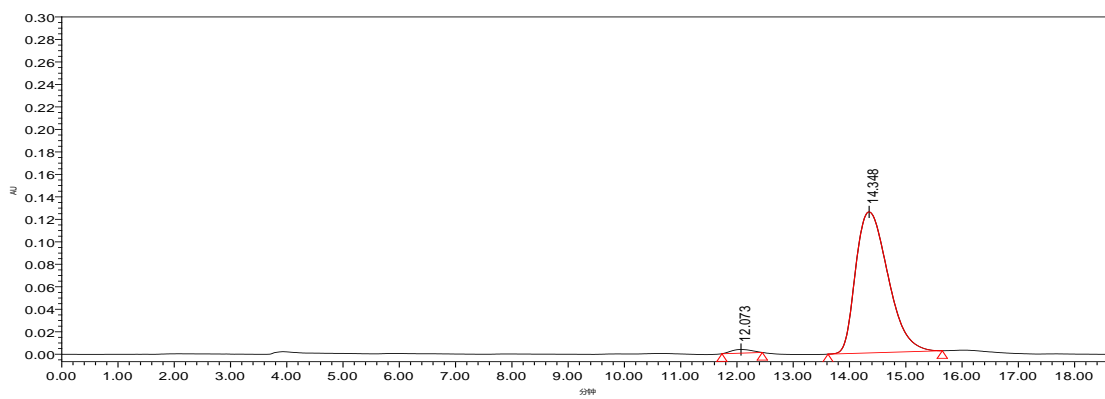

| Peak | Ret Time[min] | Area    | % Area | Height |
|------|---------------|---------|--------|--------|
| 1    | 12.074        | 64180   | 1.21   | 2711   |
| 2    | 14.348        | 5232259 | 98.79  | 126838 |

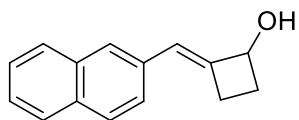

Racemate-5i

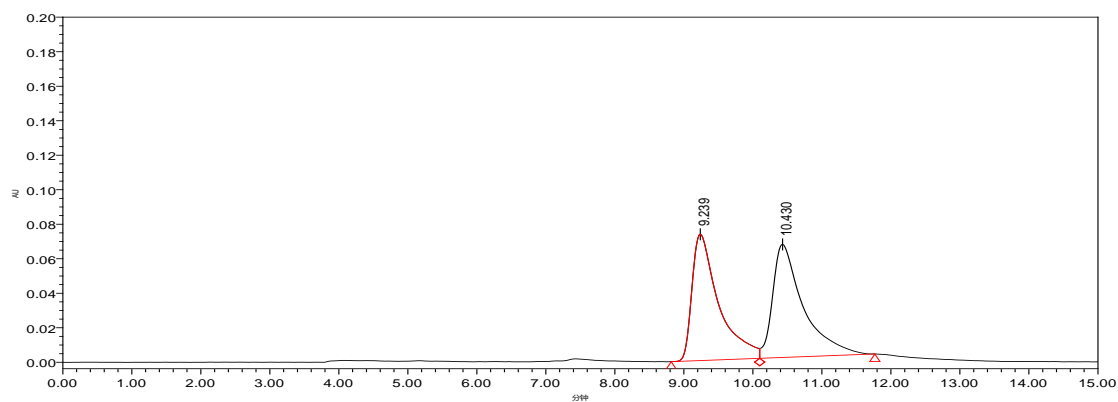

| Peak | Ret Time[min] | Area    | % Area | Height |
|------|---------------|---------|--------|--------|
| 1    | 9.239         | 1968317 | 49.36  | 73320  |
| 2    | 10.430        | 2019271 | 50.64  | 65599  |

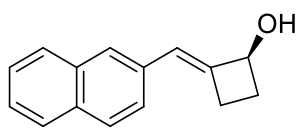

(S)-5i

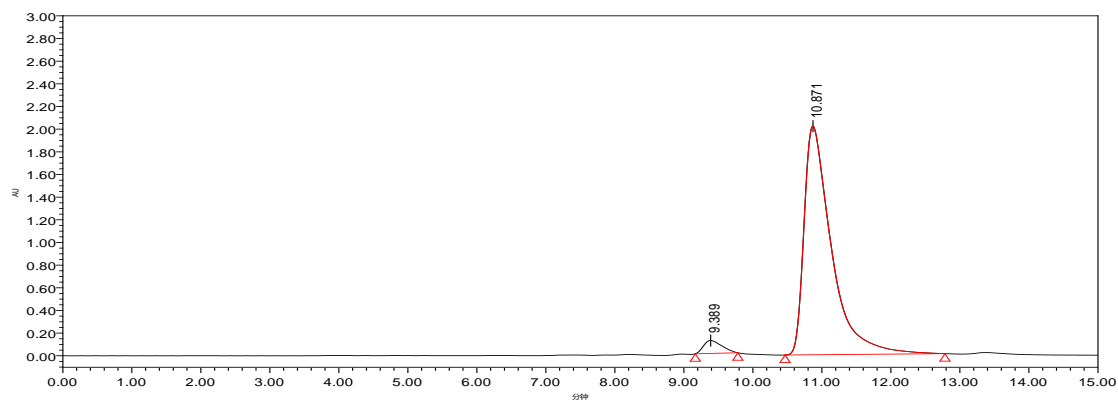

| Peak | Ret Time[min] | Area     | % Area | Height  |
|------|---------------|----------|--------|---------|
| 1    | 9.389         | 2094303  | 3.63   | 114286  |
| 2    | 10.871        | 55641443 | 96.37  | 2020830 |

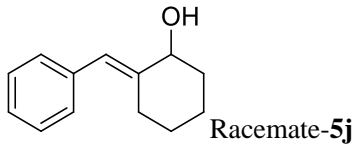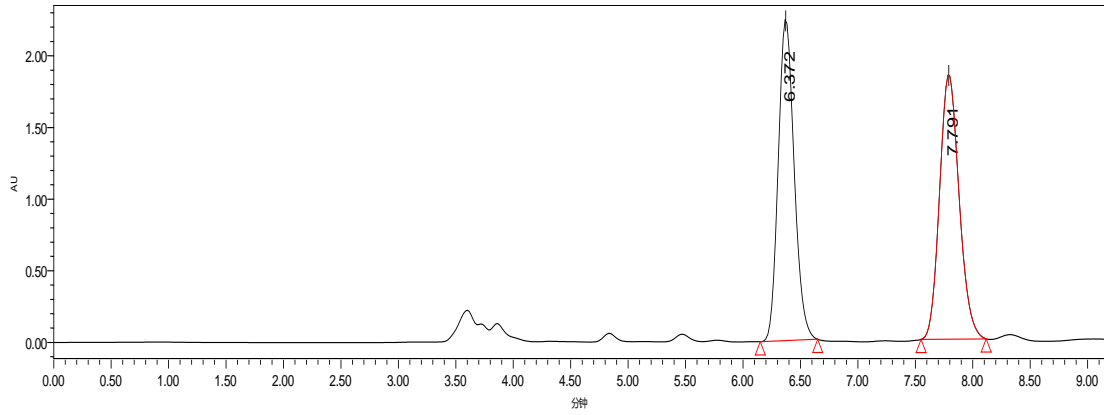

| Peak | Ret Time [min] | Area     | % Area | Height  |
|------|----------------|----------|--------|---------|
| 1    | 6.372          | 21542359 | 49.49  | 2242832 |
| 2    | 7.791          | 21985575 | 50.51  | 1854274 |

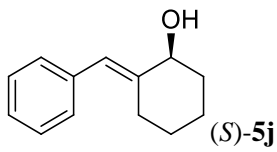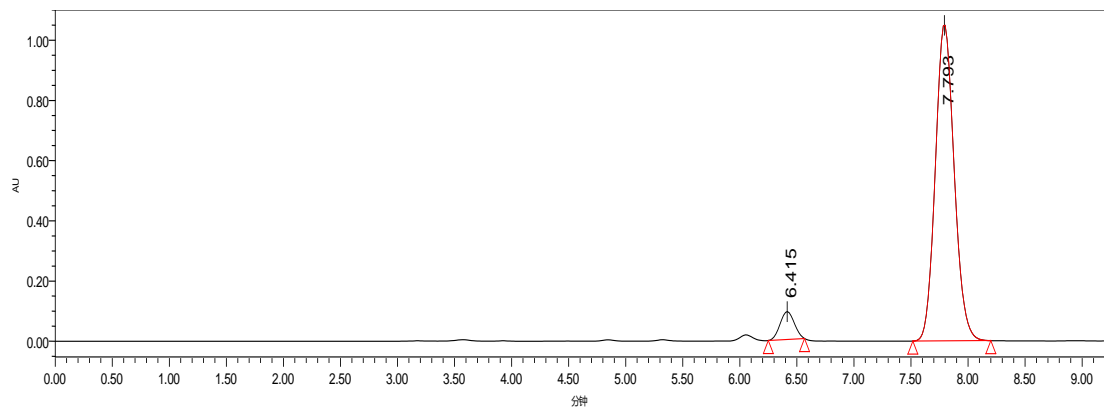

| Peak | Ret Time [min] | Area     | % Area | Height  |
|------|----------------|----------|--------|---------|
| 1    | 6.415          | 741346   | 5.78   | 88379   |
| 2    | 7.793          | 12076040 | 94.22  | 1052311 |

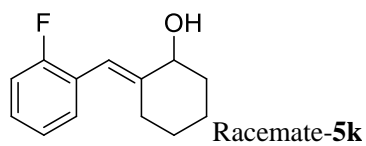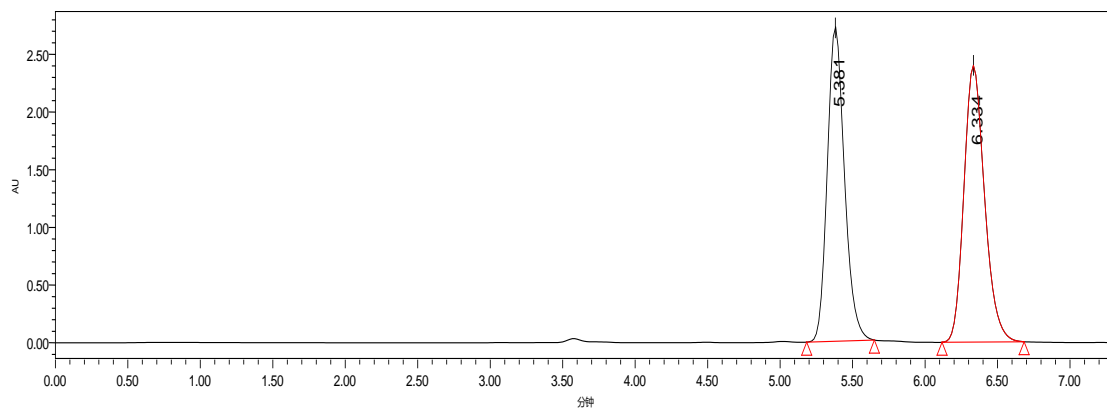

| Peak | Ret Time [min] | Area     | % Area | Height  |
|------|----------------|----------|--------|---------|
| 1    | 5.381          | 22945614 | 49.65  | 2721645 |
| 2    | 6.334          | 23269117 | 50.35  | 2396932 |

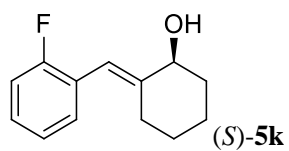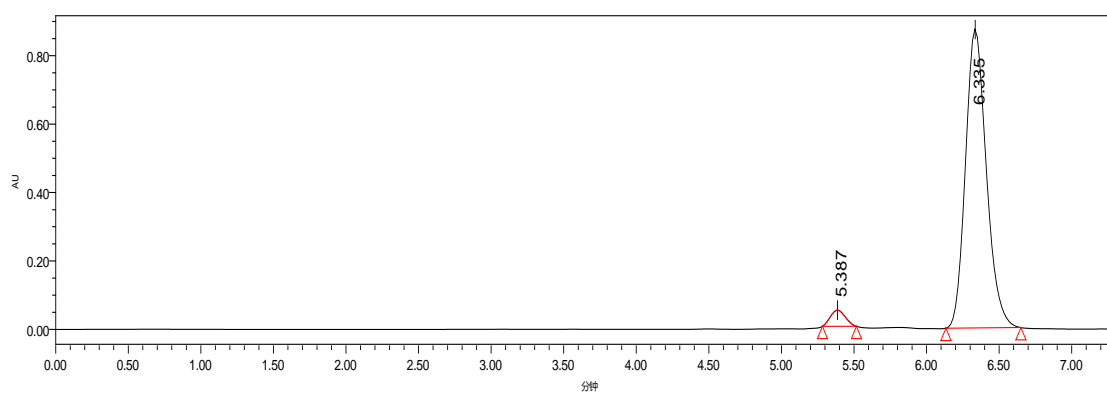

| Peak | Ret Time [min] | Area    | % Area | Height |
|------|----------------|---------|--------|--------|
| 1    | 5.387          | 364187  | 3.99   | 49071  |
| 2    | 6.335          | 8763230 | 96.01  | 875006 |

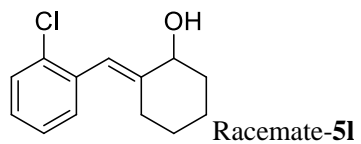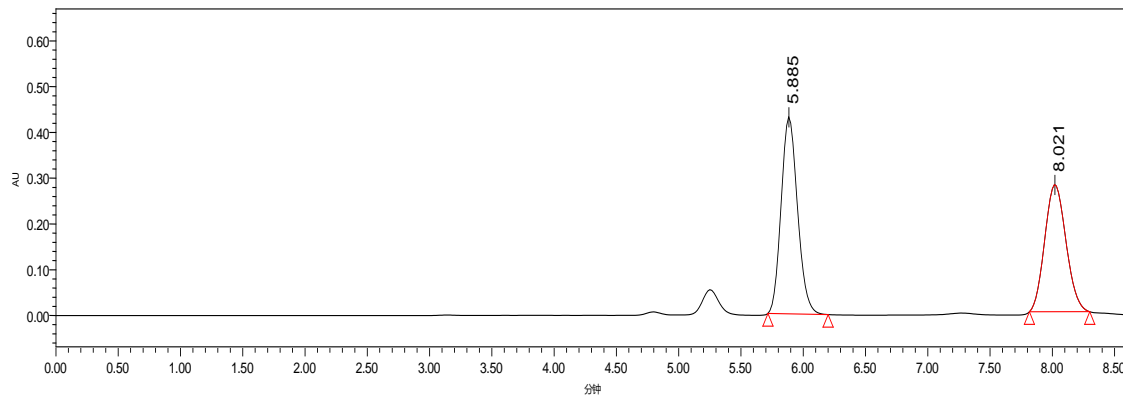

| Peak | Ret Time [min] | Area    | % Area | Height |
|------|----------------|---------|--------|--------|
| 1    | 5.885          | 3593082 | 50.03  | 421994 |
| 2    | 8.021          | 3588773 | 49.97  | 283082 |

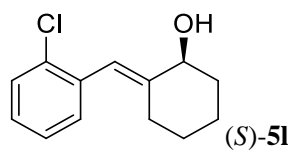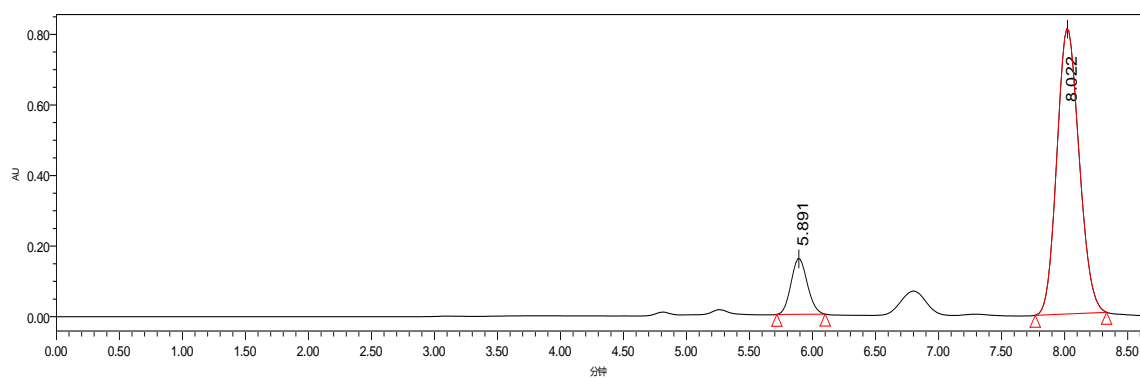

| Peak | Ret Time [min] | Area    | % Area | Height |
|------|----------------|---------|--------|--------|
| 1    | 5.891          | 1357483 | 12.01  | 155546 |
| 2    | 8.022          | 9945829 | 87.99  | 810179 |

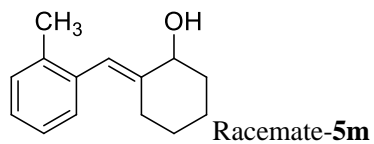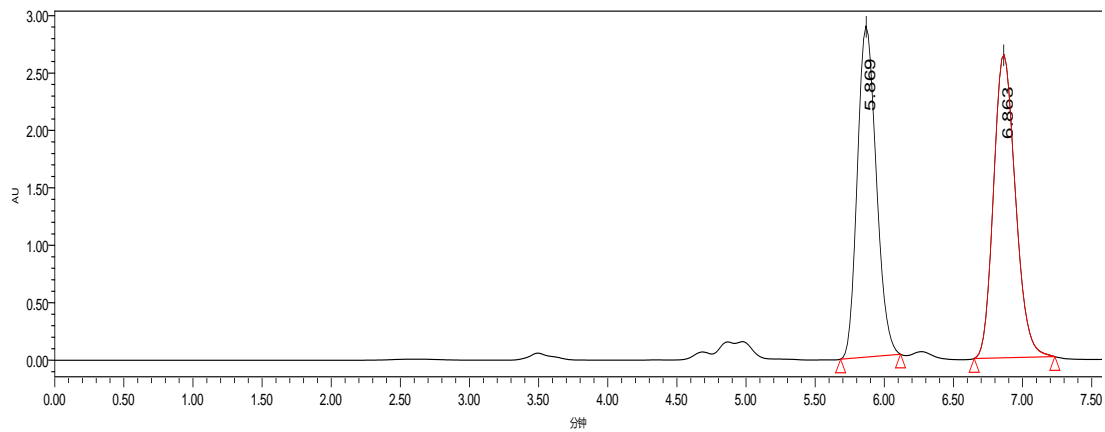

| Peak | Ret Time [min] | Area     | % Area | Height  |
|------|----------------|----------|--------|---------|
| 1    | 5.869          | 2794779  | 49.53  | 2882421 |
| 2    | 6.863          | 28478197 | 50.47  | 2640690 |

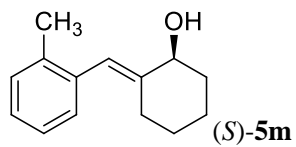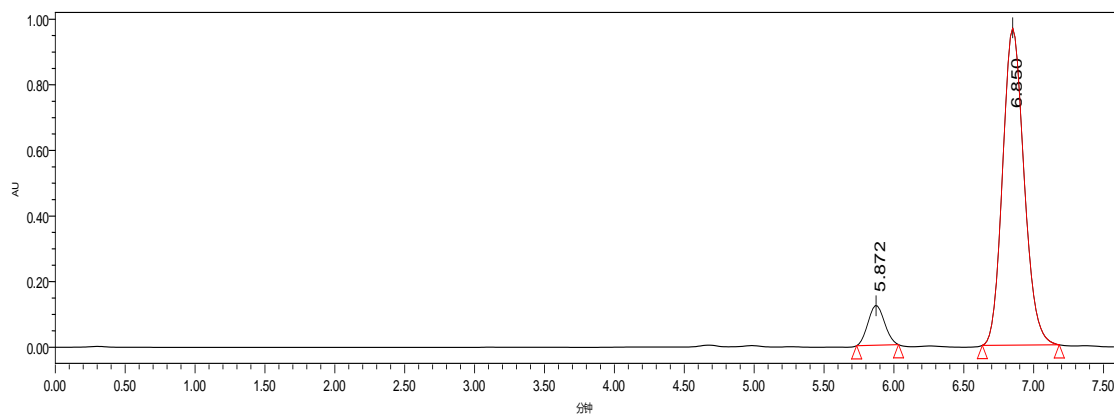

| Peak | Ret Time [min] | Area     | % Area | Height |
|------|----------------|----------|--------|--------|
| 1    | 5.872          | 998094   | 8.71   | 121320 |
| 2    | 6.850          | 10463692 | 91.29  | 971250 |

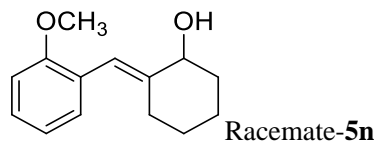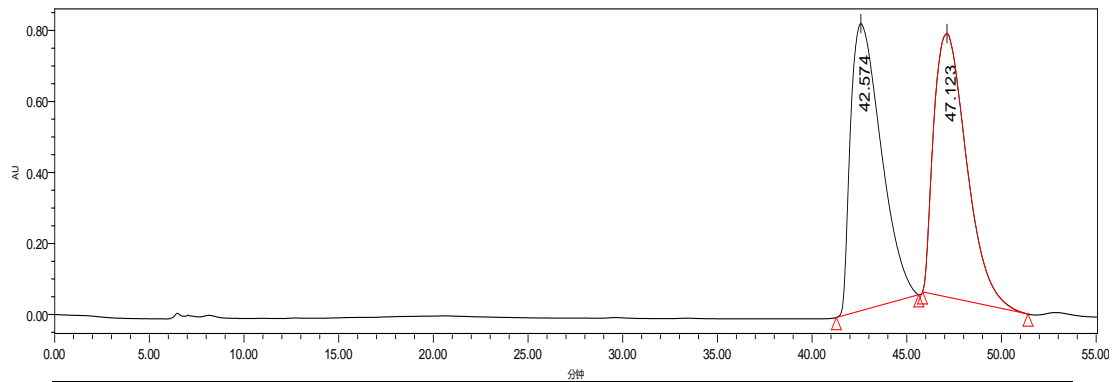

| Peak | Ret Time [min] | Area     | % Area | Height |
|------|----------------|----------|--------|--------|
| 1    | 42.574         | 90531836 | 50.39  | 807994 |
| 2    | 47.123         | 89145898 | 49.61  | 741759 |

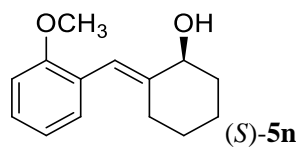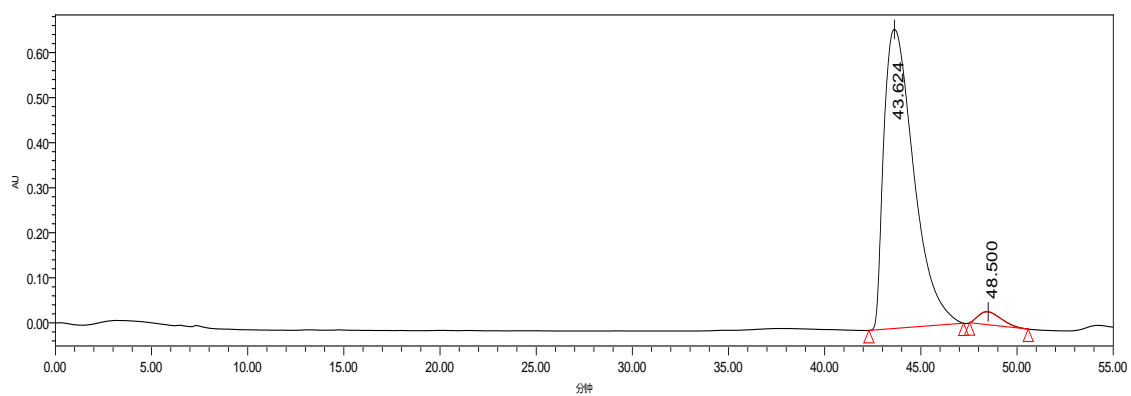

| Peak | Ret Time [min] | Area     | % Area | Height |
|------|----------------|----------|--------|--------|
| 1    | 43.624         | 71712238 | 97.39  | 663794 |
| 2    | 48.467         | 1919134  | 2.61   | 26044  |

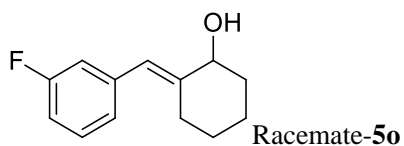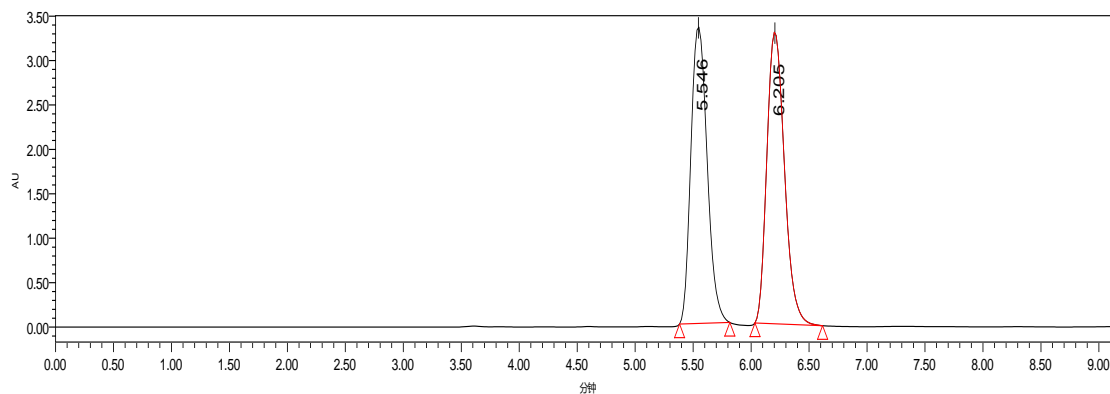

| Peak | Ret Time [min] | Area     | % Area | Height  |
|------|----------------|----------|--------|---------|
| 1    | 5.546          | 33268313 | 49.55  | 3341673 |
| 2    | 6.205          | 33872581 | 50.45  | 3289192 |

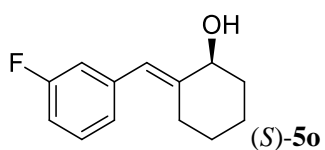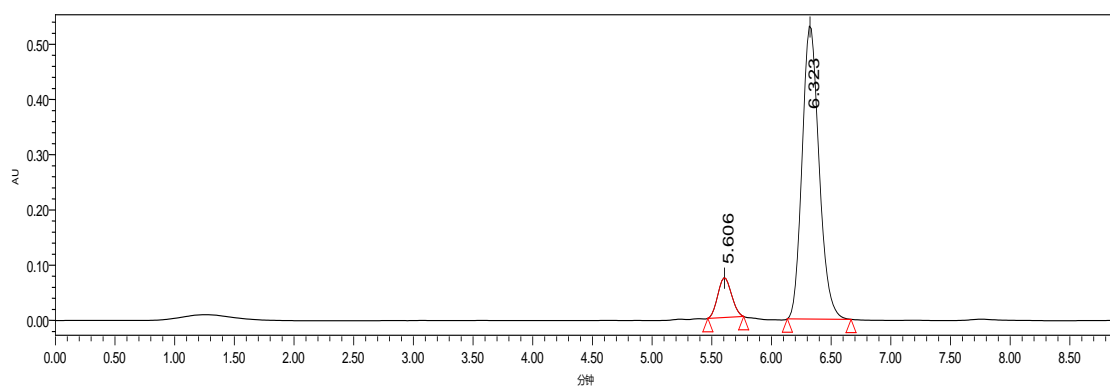

| Peak | Ret Time [min] | Area    | % Area | Height |
|------|----------------|---------|--------|--------|
| 1    | 5.606          | 580158  | 9.95   | 72002  |
| 2    | 6.323          | 5248407 | 90.05  | 532393 |



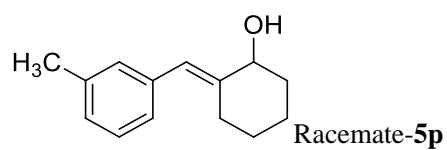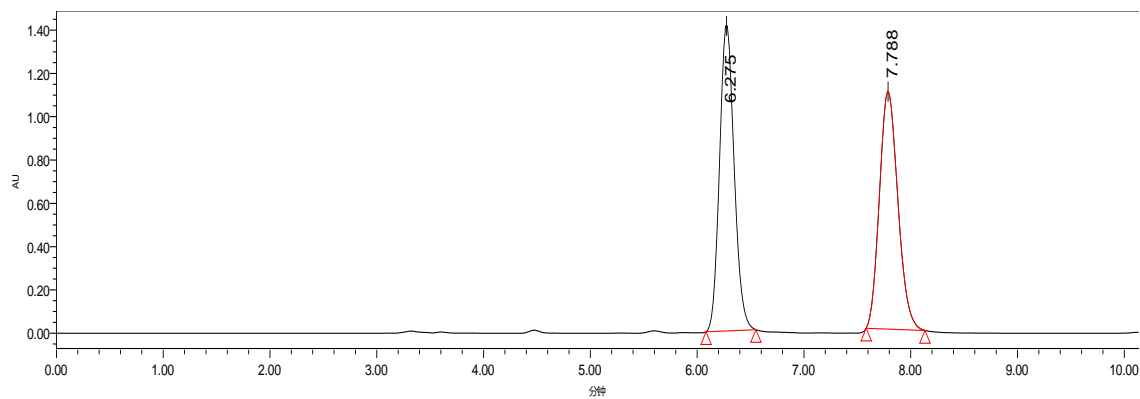

| Peak | Ret Time [min] | Area     | % Area | Height  |
|------|----------------|----------|--------|---------|
| 1    | 6.275          | 13428288 | 50.43  | 1419445 |
| 2    | 7.788          | 13198909 | 49.57  | 1101174 |

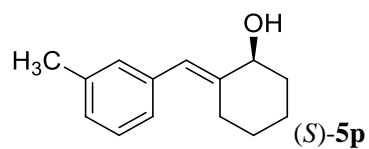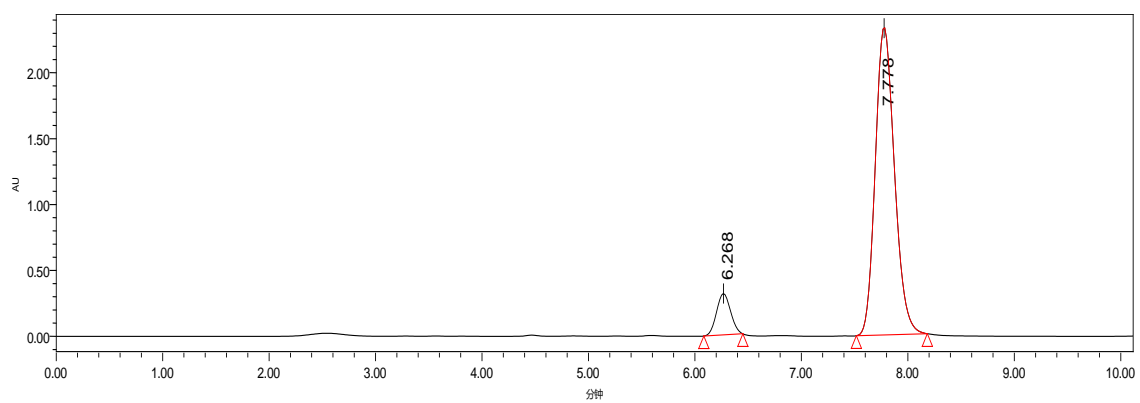

| Peak | Ret Time [min] | Area     | % Area | Height  |
|------|----------------|----------|--------|---------|
| 1    | 6.268          | 2641771  | 8.30   | 302418  |
| 2    | 7.778          | 29204708 | 91.70  | 2336243 |

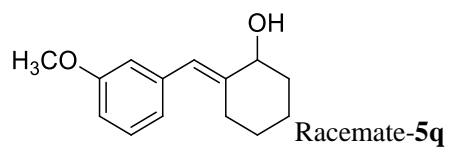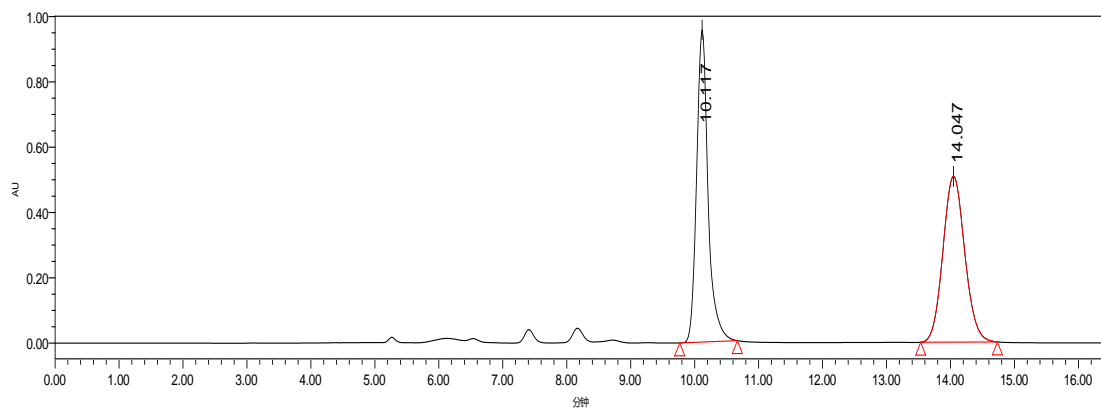

| Peak | Ret Time [min] | Area     | % Area | Height |
|------|----------------|----------|--------|--------|
| 1    | 10.117         | 11904281 | 49.74  | 955532 |
| 2    | 14.047         | 12029640 | 50.26  | 508155 |

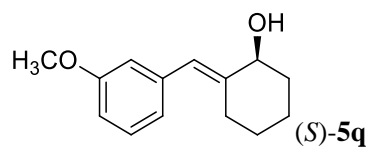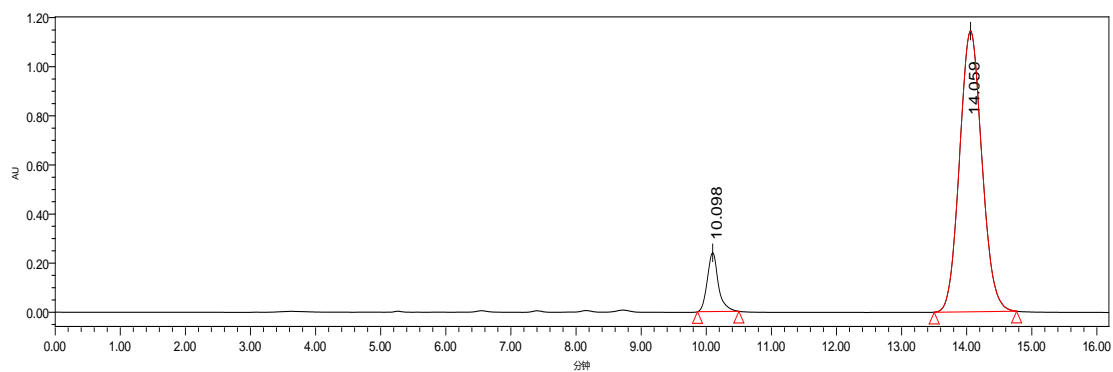

| Peak | Ret Time [min] | Area     | % Area | Height  |
|------|----------------|----------|--------|---------|
| 1    | 10.098         | 2618126  | 8.76   | 235162  |
| 2    | 14.059         | 27274635 | 91.24  | 1145126 |

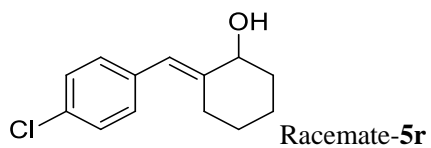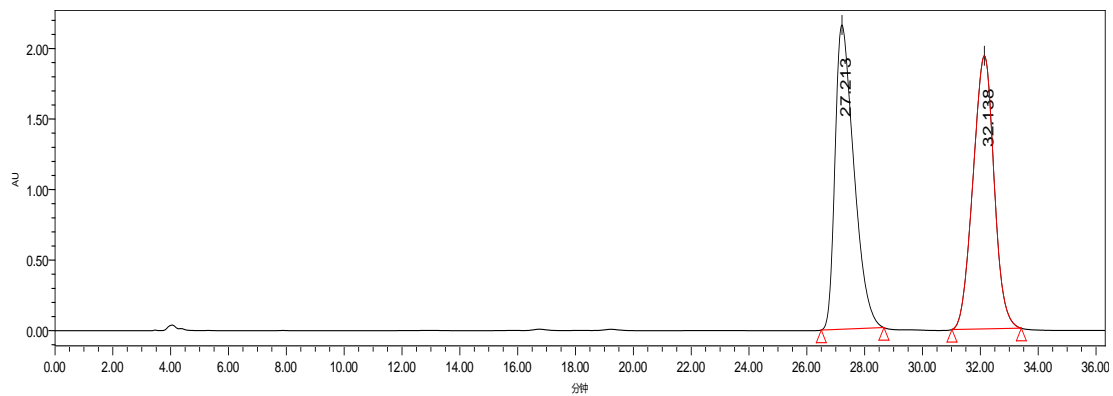

| Peak | Ret Time [min] | Area     | % Area | Height  |
|------|----------------|----------|--------|---------|
| 1    | 27.213         | 97245781 | 50.11  | 2155181 |
| 2    | 32.138         | 96836864 | 49.89  | 1928088 |

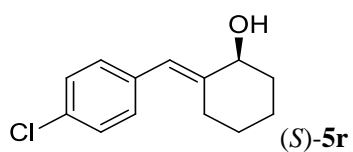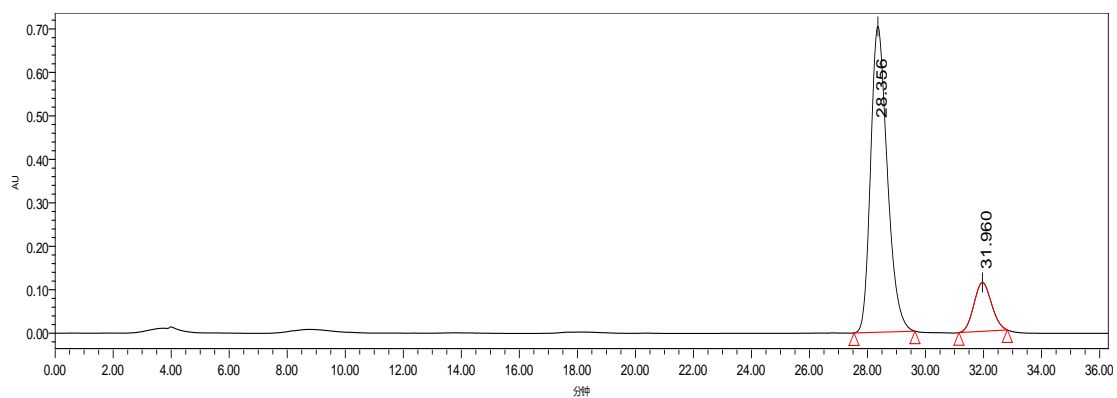

| Peak | Ret Time [min] | Area     | % Area | Height |
|------|----------------|----------|--------|--------|
| 1    | 28.356         | 28097538 | 86.77  | 703770 |
| 2    | 31.960         | 4285822  | 13.23  | 107552 |

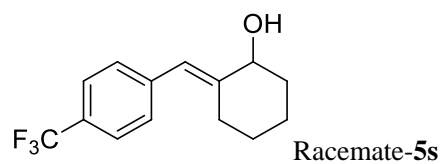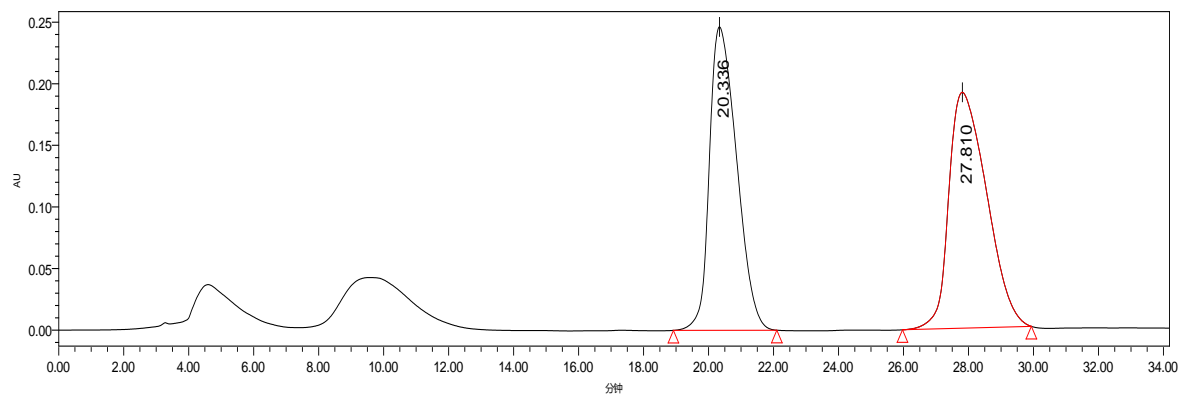

| Peak | Ret Time [min] | Area     | % Area | Height |
|------|----------------|----------|--------|--------|
| 1    | 20.336         | 14628678 | 49.04  | 246337 |
| 2    | 27.810         | 15201416 | 50.96  | 191492 |

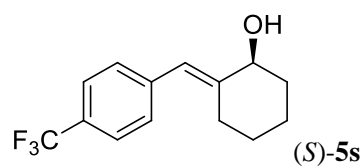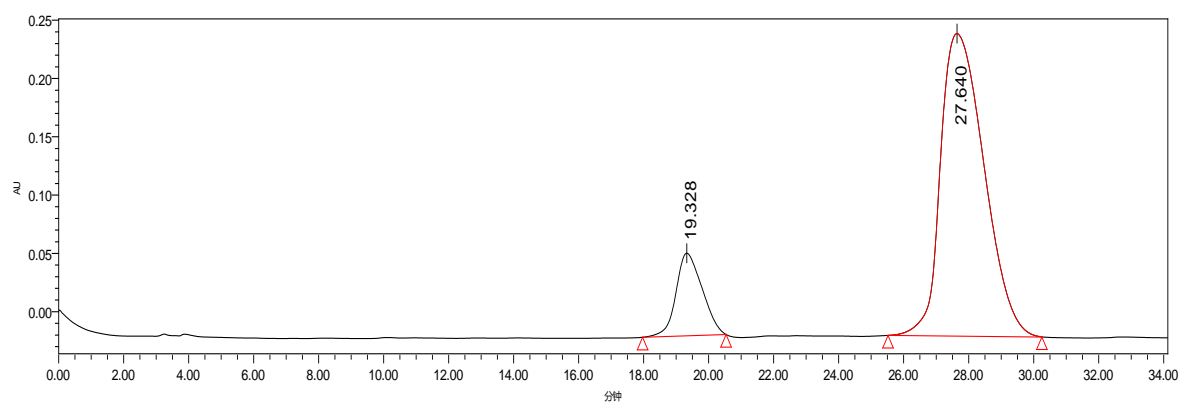

| Peak | Ret Time [min] | Area     | % Area | Height |
|------|----------------|----------|--------|--------|
| 1    | 19.328         | 4104976  | 14.52  | 71829  |
| 2    | 27.640         | 24167215 | 85.48  | 259458 |

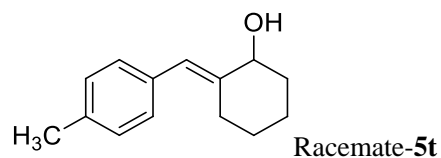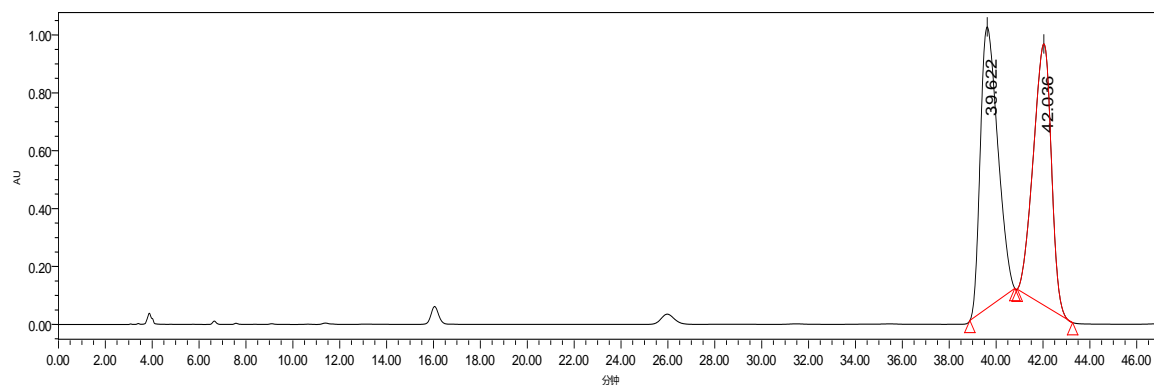

| Peak | Ret Time [min] | Area     | % Area | Height |
|------|----------------|----------|--------|--------|
| 1    | 39.622         | 49904542 | 50.99  | 971560 |
| 2    | 42.036         | 47959242 | 49.01  | 902585 |

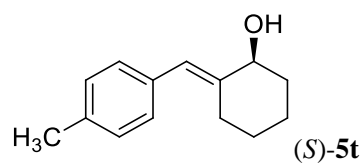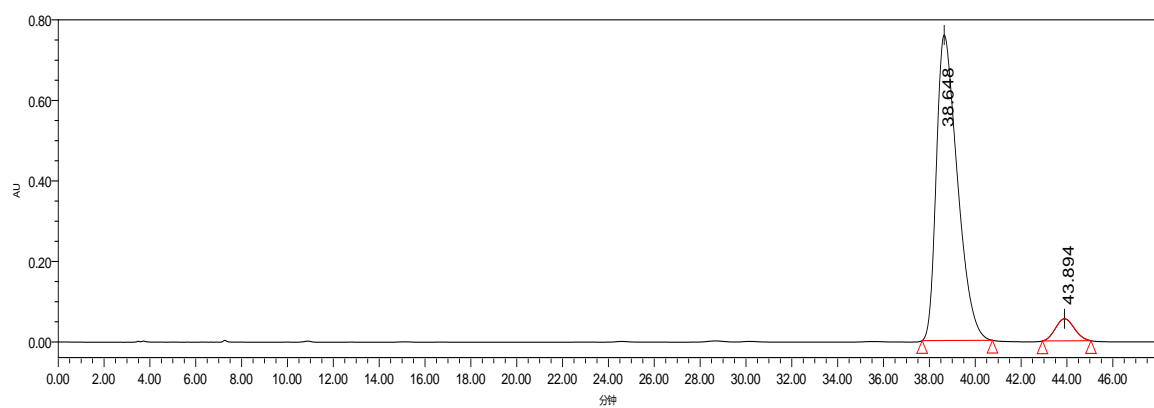

| Peak | Ret Time [min] | Area     | % Area | Height |
|------|----------------|----------|--------|--------|
| 1    | 38.648         | 48676496 | 94.60  | 760992 |
| 2    | 43.894         | 2780814  | 5.40   | 51902  |

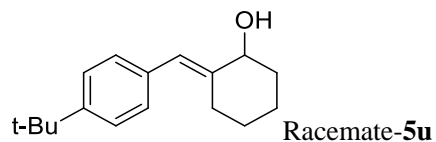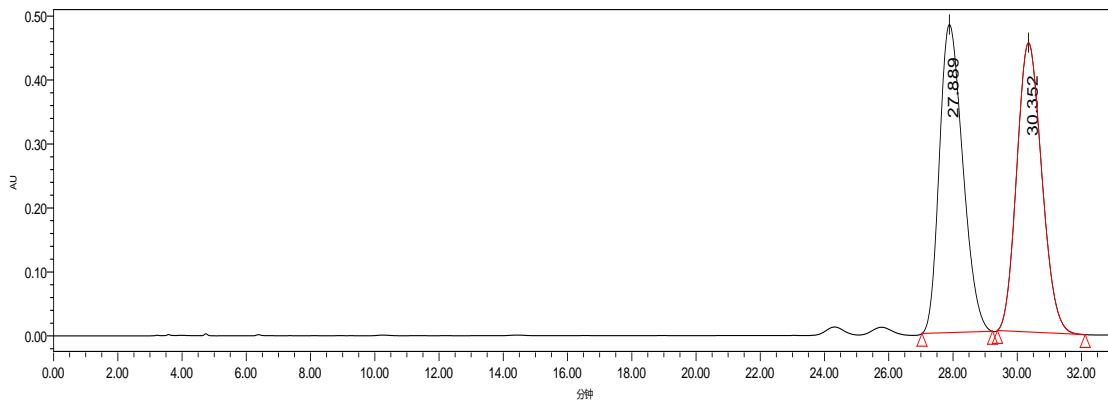

| Peak | Ret Time [min] | Area     | % Area | Height |
|------|----------------|----------|--------|--------|
| 1    | 27.889         | 24412830 | 49.99  | 481718 |
| 2    | 30.352         | 24418997 | 50.01  | 452043 |

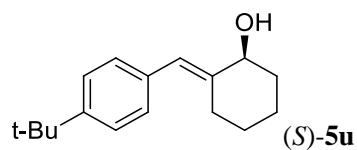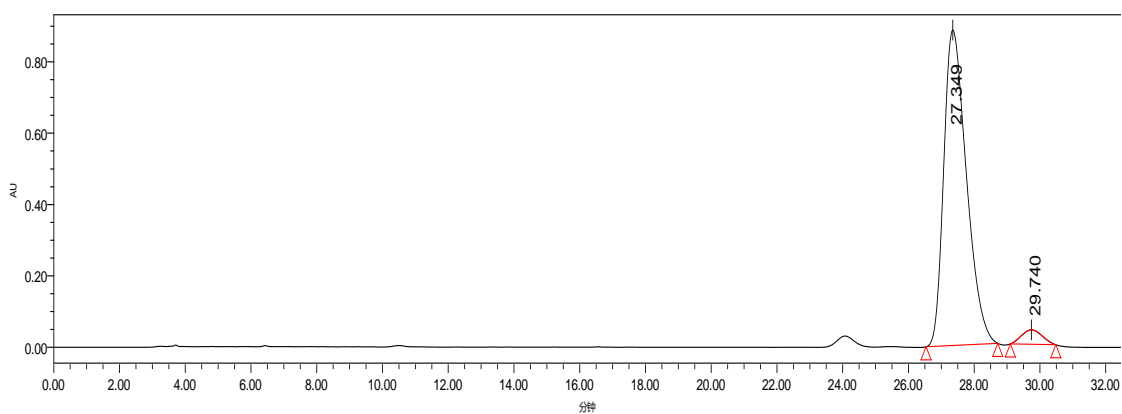

| Peak | Ret Time [min] | Area     | % Area | Height |
|------|----------------|----------|--------|--------|
| 1    | 27.349         | 42399827 | 96.39  | 884544 |
| 2    | 29.740         | 1589307  | 3.61   | 38243  |

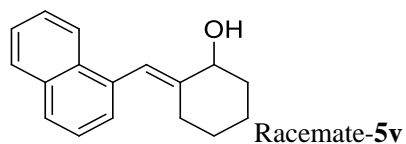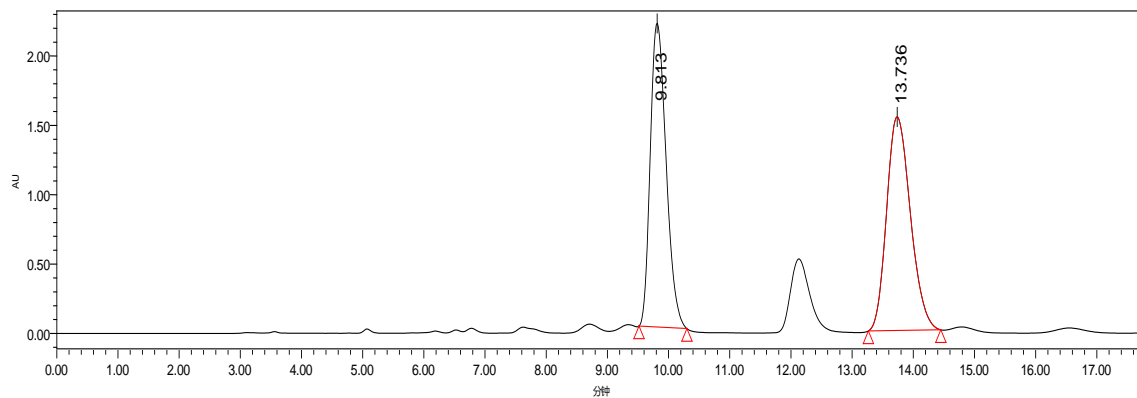

| Peak | Ret Time [min] | Area     | % Area | Height  |
|------|----------------|----------|--------|---------|
| 1    | 9.813          | 40199623 | 49.59  | 2191365 |
| 2    | 13.736         | 40864347 | 50.41  | 1541108 |

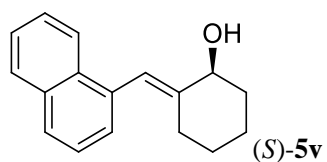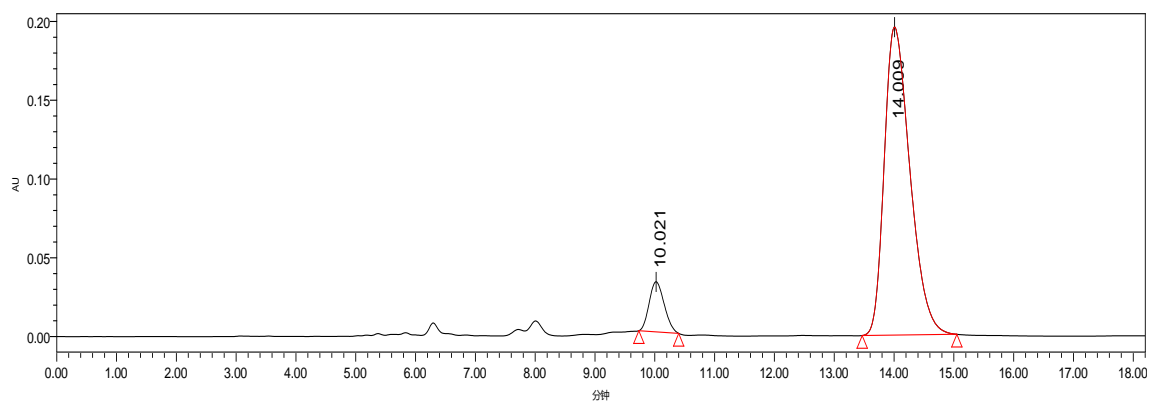

| Peak | Ret Time [min] | Area    | % Area | Height |
|------|----------------|---------|--------|--------|
| 1    | 10.021         | 528859  | 8.27   | 30895  |
| 2    | 14.009         | 5865084 | 91.73  | 195756 |

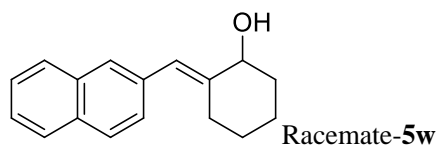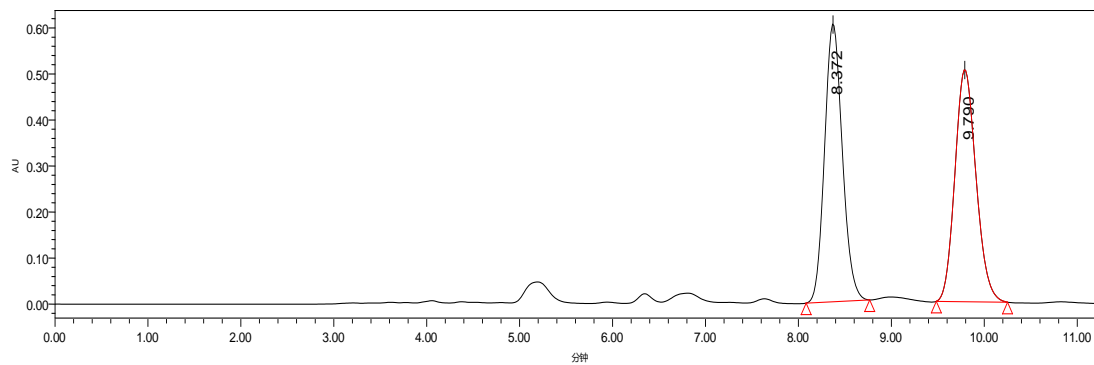

| Peak | Ret Time [min] | Area    | % Area | Height |
|------|----------------|---------|--------|--------|
| 1    | 8.372          | 8022270 | 50.21  | 604494 |
| 2    | 9.790          | 7956540 | 49.79  | 504831 |

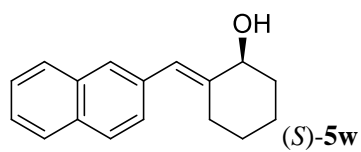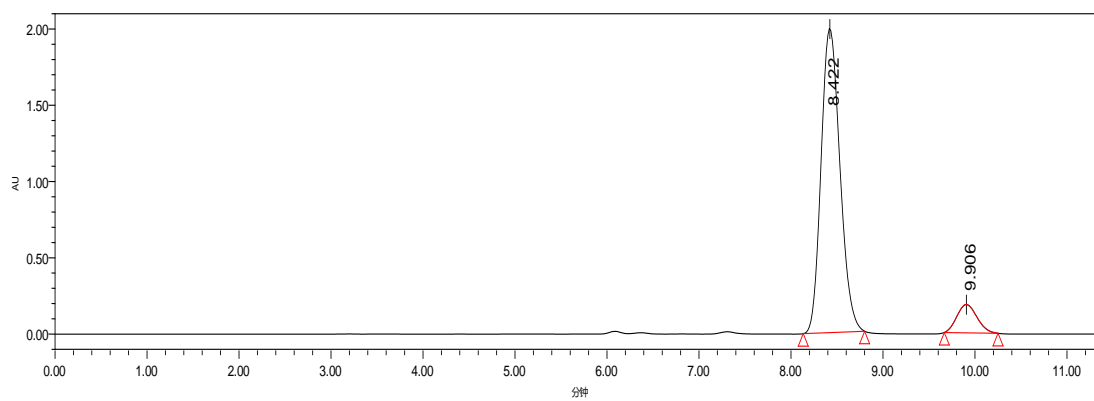

| Peak | Ret Time [min] | Area     | % Area | Height  |
|------|----------------|----------|--------|---------|
| 1    | 8.422          | 28353940 | 91.64  | 1995150 |
| 2    | 9.906          | 2586007  | 8.36   | 178886  |



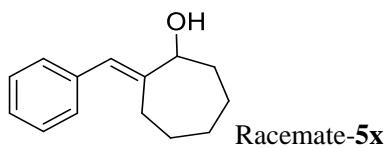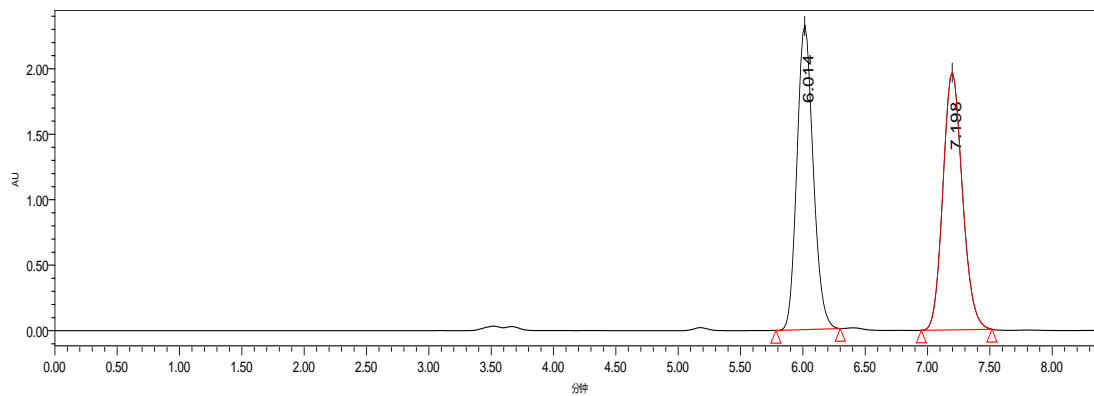

| Peak | Ret Time [min] | Area     | % Area | Height  |
|------|----------------|----------|--------|---------|
| 1    | 6.014          | 21078766 | 49.65  | 2323508 |
| 2    | 7.198          | 21378717 | 50.35  | 1967614 |

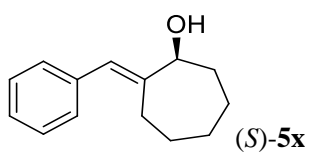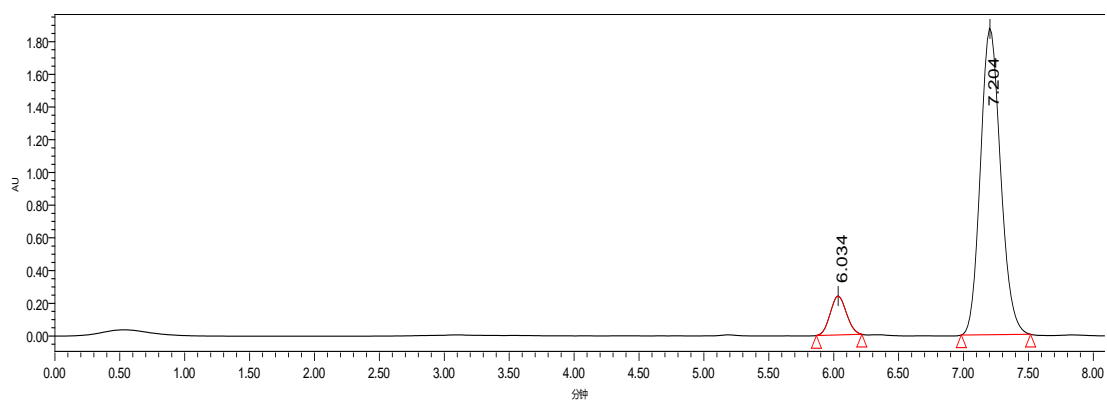

| Peak | Ret Time [min] | Area     | % Area | Height  |
|------|----------------|----------|--------|---------|
| 1    | 6.034          | 1662364  | 7.60   | 215134  |
| 2    | 7.204          | 20201744 | 92.40  | 1877168 |

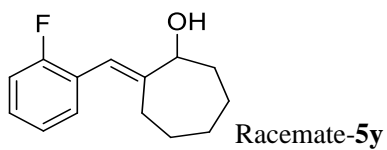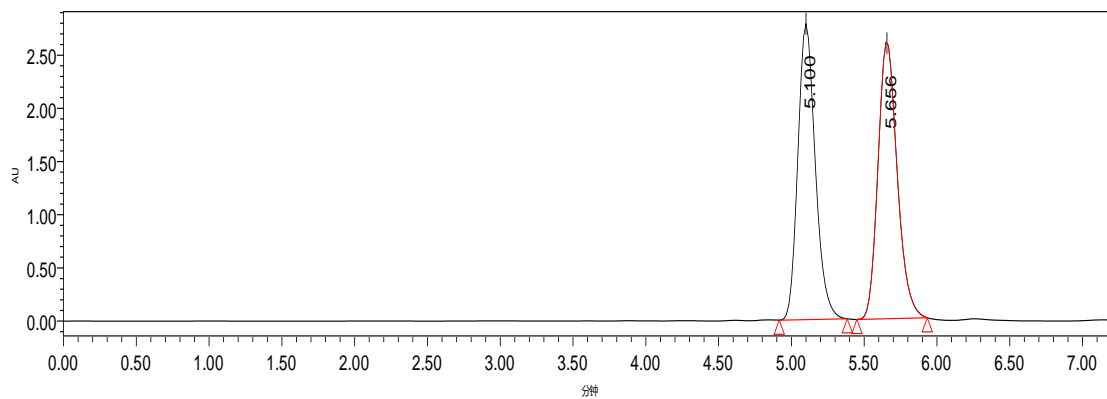

| Peak | Ret Time [min] | Area     | % Area | Height  |
|------|----------------|----------|--------|---------|
| 1    | 5.100          | 23417123 | 49.70  | 2766796 |
| 2    | 5.656          | 23699824 | 50.30  | 2617282 |

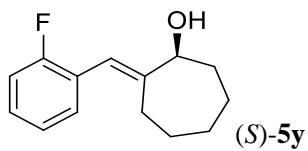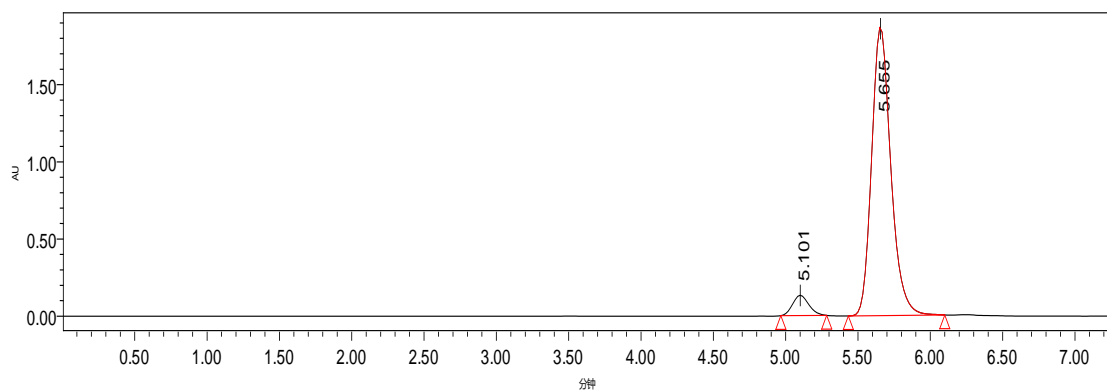

| Peak | Ret Time [min] | Area     | % Area | Height  |
|------|----------------|----------|--------|---------|
| 1    | 5.101          | 862314   | 4.81   | 121686  |
| 2    | 5.655          | 17073546 | 95.19  | 1869363 |

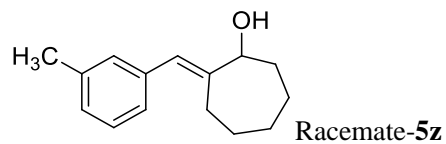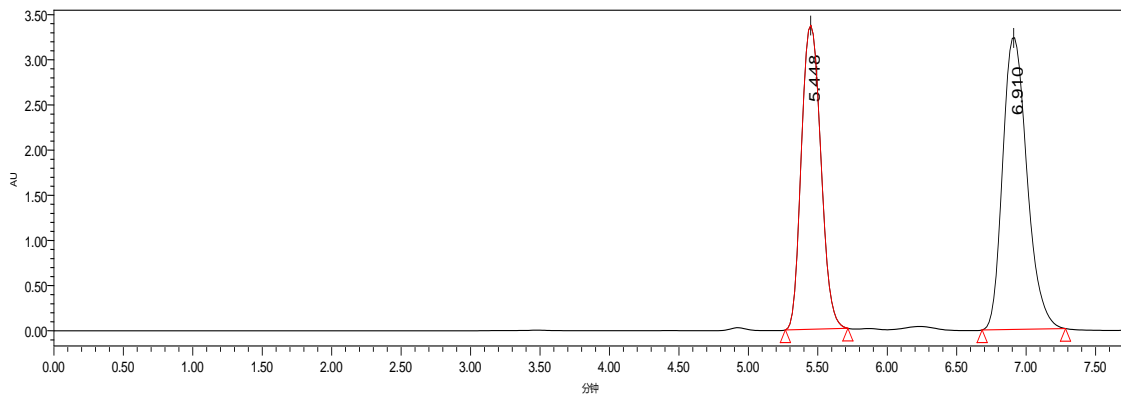

| Peak | Ret Time [min] | Area     | % Area | Height  |
|------|----------------|----------|--------|---------|
| 1    | 5.448          | 32580682 | 49.70  | 3361851 |
| 2    | 6.910          | 32976954 | 50.30  | 3020364 |

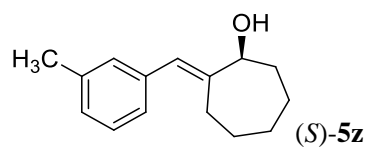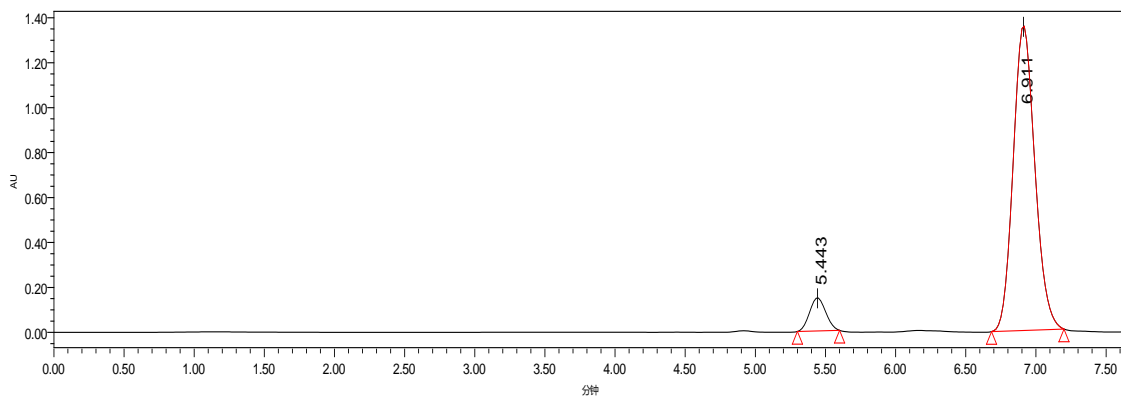

| Peak | Ret Time [min] | Area     | % Area | Height  |
|------|----------------|----------|--------|---------|
| 1    | 5.443          | 1098062  | 6.99   | 142107  |
| 2    | 6.911          | 14618536 | 93.01  | 1357609 |

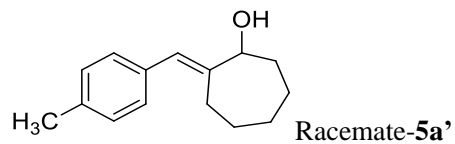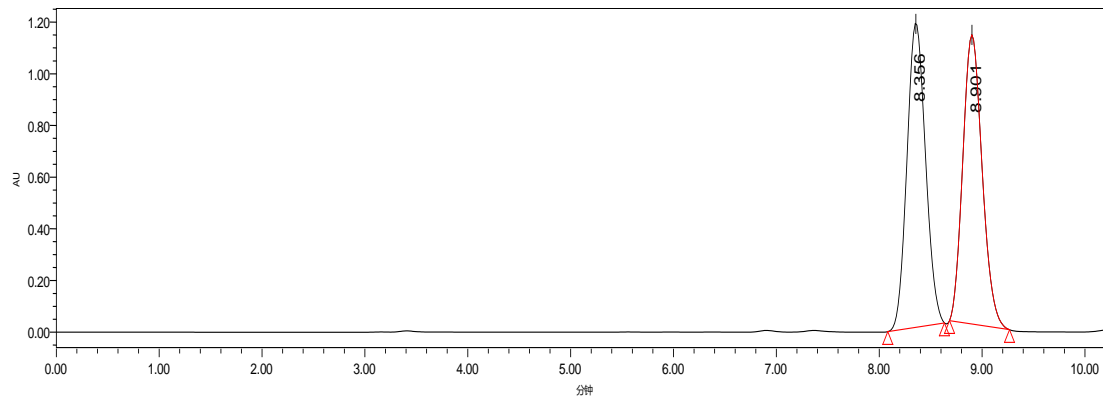

| Peak | Ret Time [min] | Area     | % Area | Height  |
|------|----------------|----------|--------|---------|
| 1    | 8.356          | 14778213 | 50.33  | 1179599 |
| 2    | 8.901          | 14586676 | 49.67  | 1119881 |

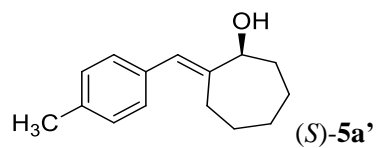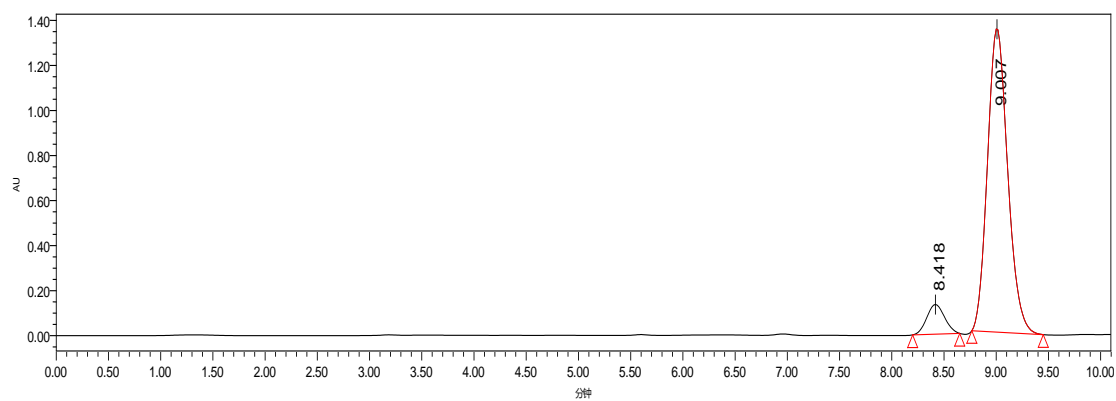

| Peak | Ret Time [min] | Area     | % Area | Height  |
|------|----------------|----------|--------|---------|
| 1    | 8.418          | 1565516  | 7.92   | 131881  |
| 2    | 9.007          | 18192640 | 92.08  | 1350147 |

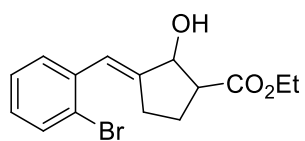

Racemate-7

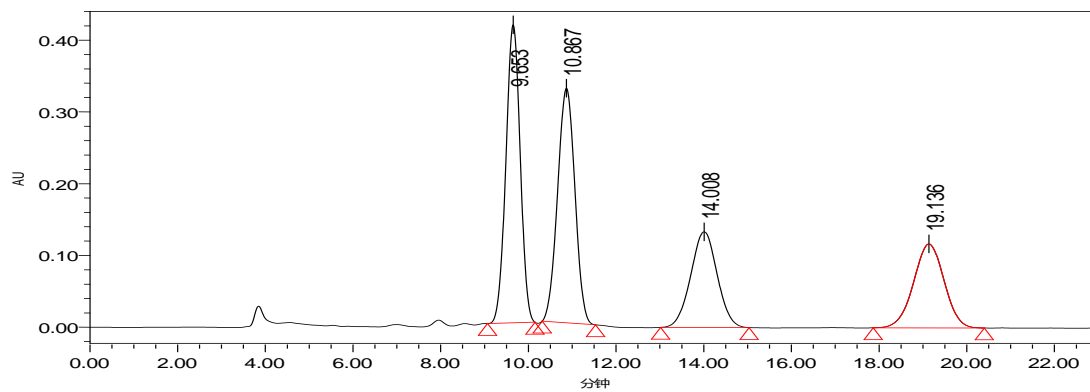

| Peak | Ret Time [min] | Area    | % Area | Height | Type |
|------|----------------|---------|--------|--------|------|
| 1    | 9.653          | 9447018 | 31.81  | 415354 | bb   |
| 2    | 10.867         | 8984743 | 30.25  | 327048 | bb   |
| 3    | 14.008         | 5598461 | 18.85  | 133285 | bb   |
| 4    | 19.136         | 5669274 | 19.09  | 117068 | bb   |

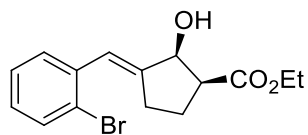

(*S,S*)-7

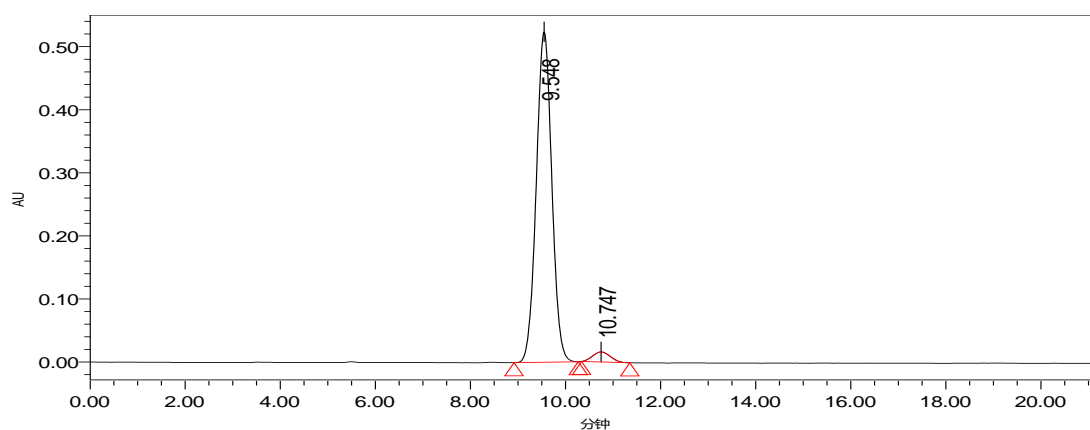

| Peak | Ret Time [min] | Area     | % Area | Height | Type |
|------|----------------|----------|--------|--------|------|
| 1    | 9.548          | 11880217 | 96.97  | 523901 | bb   |
| 2    | 10.747         | 371570   | 3.03   | 15263  | bb   |
